# Supplementary material for: Unveiling promising breast cancer biomarkers: an integrative approach combining bioinformatics analysis and experimental verification
Source: BMC Cancer. 2024 Jan 31;24:155. doi: 10.1186/s12885-024-11913-7 (PMC10829368; doi:10.1186/s12885-024-11913-7)
Supplement: Supplementary file 11 — Additional file 11. Gene ontology and biological pathway of co-expressed genes with CHRNA6. [file 12885_2024_11913_MOESM11_ESM.xlsx]

## Sheet: Dataset(CHRNA6 Co-expressed2)
List of Co-expressed genes with CHRNA6
Name of dataset: CHRNA6 Co-expressed2
No. of identified items: 145 of 150
No. of unidentified items: 5
ID type: GeneSymbol
Number of mapped gene: 145
Is dataset quantitative :NO
Mapped items:
Dataset item (Gene symbol )		Entrez ID	Gene symbol	Description	Alternate names	Chromosome	Map location
TEX14		56155	TEX14	testis expressed 14	CT113	17	17q22
PAK1		5058	PAK1	p21 protein (Cdc42/Rac)-activated kinase 1	PAKalpha	11	11q13-q14
FOXI2		399823	FOXI2	forkhead box I2	-	10	10q26.2
CCDC177		56936	CCDC177	coiled-coil domain containing 177	C14orf162|PLPL	14	14q24.1
AQP11		282679	AQP11	aquaporin 11	AQPX1	11	11q14.1
AFP		174	AFP	alpha-fetoprotein	AFPD|FETA|HPAFP	4	4q13.3
SLC22A17		51310	SLC22A17	solute carrier family 22, member 17	24p3R|BOCT|BOIT|NGALR|NGALR2|NGALR3|hBOIT	14	14q11.2
CYP4A22		284541	CYP4A22	cytochrome P450, family 4, subfamily A, polypeptide 22	-	1	1p33
GDPD4		220032	GDPD4	glycerophosphodiester phosphodiesterase domain containing 4	GDE6	11	11q13.5
FGFR3		2261	FGFR3	fibroblast growth factor receptor 3	ACH|CD333|CEK2|HSFGFR3EX|JTK4	4	4p16.3
RAB6A		5870	RAB6A	RAB6A, member RAS oncogene family	RAB6	11	11q13.3
MYO7A		4647	MYO7A	myosin VIIA	DFNA11|DFNB2|MYOVIIA|MYU7A|NSRD2|USH1B	11	11q13.5
ESRRB		2103	ESRRB	estrogen-related receptor beta	DFNB35|ERR2|ERRb|ESRL2|NR3B2	14	14q24.3
CYP4X1		260293	CYP4X1	cytochrome P450, family 4, subfamily X, polypeptide 1	CYPIVX1	1	1p33|1
KAT6A		7994	KAT6A	K(lysine) acetyltransferase 6A	MOZ|MRD32|MYST-3|MYST3|RUNXBP2|ZC2HC6A|ZNF220	8	8p11
GP2		2813	GP2	glycoprotein 2 (zymogen granule membrane)	ZAP75	16	16p12
ATP2A3		489	ATP2A3	ATPase, Ca++ transporting, ubiquitous	SERCA3	17	17p13.3
ADRA1B		147	ADRA1B	adrenoceptor alpha 1B	ADRA1|ALPHA1BAR	5	5q33.3
OR2G6		391211	OR2G6	olfactory receptor, family 2, subfamily G, member 6	-	1	1q44
COL28A1		340267	COL28A1	collagen, type XXVIII, alpha 1	COL28	7	7p21.3
CCDC170		80129	CCDC170	coiled-coil domain containing 170	C6orf97|bA282P11.1	6	6q25.1
KLC2		64837	KLC2	kinesin light chain 2	-	11	11q13.2
AFF3		3899	AFF3	AF4/FMR2 family, member 3	LAF4|MLLT2-like	2	2q11.2-q12
CNTN3		5067	CNTN3	contactin 3 (plasmacytoma associated)	BIG-1|PANG|PCS	3	3p12.3
KIF12		113220	KIF12	kinesin family member 12	-	9	9q32
RASSF6		166824	RASSF6	Ras association (RalGDS/AF-6) domain family member 6	-	4	4q13.3
CCND1		595	CCND1	cyclin D1	BCL1|D11S287E|PRAD1|U21B31	11	11q13
RGS8		85397	RGS8	regulator of G-protein signaling 8	-	1	1q25
LONRF2		164832	LONRF2	LON peptidase N-terminal domain and ring finger 2	RNF192	2	2q11.2
GPC3		2719	GPC3	glypican 3	DGSX|GTR2-2|MXR7|OCI-5|SDYS|SGB|SGBS|SGBS1	X	Xq26.1
INTS4		92105	INTS4	integrator complex subunit 4	INT4|MST093	11	11q14.1
BMP2K		55589	BMP2K	BMP2 inducible kinase	BIKE|HRIHFB2017	4	4q21.21
CCDC74B		91409	CCDC74B	coiled-coil domain containing 74B	-	2	2q21.1
RAB1B		81876	RAB1B	RAB1B, member RAS oncogene family	-	11	11q12
LETM2		137994	LETM2	leucine zipper-EF-hand containing transmembrane protein 2	-	8	8p11.23
NEU3		10825	NEU3	sialidase 3 (membrane sialidase)	SIAL3	11	11q13.5
DENND1B		163486	DENND1B	DENN/MADD domain containing 1B	C1ORF18|C1orf218|FAM31B	1	1q31.3
OR2T34		127068	OR2T34	olfactory receptor, family 2, subfamily T, member 34	-	1	1q44
NOVA1		4857	NOVA1	neuro-oncological ventral antigen 1	Nova-1	14	14q
BBS1		582	BBS1	Bardet-Biedl syndrome 1	BBS2L2	11	11q13
PCDH20		64881	PCDH20	protocadherin 20	PCDH13	13	13q21
MUS81		80198	MUS81	MUS81 structure-specific endonuclease subunit	SLX3	11	11q13
SLC4A8		9498	SLC4A8	solute carrier family 4, sodium bicarbonate cotransporter, member 8	NBC3|NDCBE	12	12q13.13
FAM168A		23201	FAM168A	family with sequence similarity 168, member A	KIAA0280|TCRP1	11	11q13.4
SF3B2		10992	SF3B2	splicing factor 3b, subunit 2, 145kDa	Cus1|SAP145|SF3B145|SF3b1|SF3b150	11	11q13.1
MGAT4A		11320	MGAT4A	mannosyl (alpha-1,3-)-glycoprotein beta-1,4-N-acetylglucosaminyltransferase, isozyme A	GNT-IV|GNT-IVA|GnT-4a	2	2q12
FOXD4L4		349334	FOXD4L4	forkhead box D4-like 4	FOXD4L2|FOXD4b|bA460E7.2	9	9q21.11
RGS21		431704	RGS21	regulator of G-protein signaling 21	-	1	1q31.2
FIBP		9158	FIBP	fibroblast growth factor (acidic) intracellular binding protein	FGFIBP|FIBP-1	11	11q13.1
ITGB8		3696	ITGB8	integrin, beta 8	-	7	7p21.1
TMEM26		219623	TMEM26	transmembrane protein 26	-	10	10q21.2
ZNF703		80139	ZNF703	zinc finger protein 703	NLZ1|ZEPPO1|ZNF503L|ZPO1	8	8p11.23
ANKRD13D		338692	ANKRD13D	ankyrin repeat domain 13 family, member D	-	11	11q13.2
TCEAL1		9338	TCEAL1	transcription elongation factor A (SII)-like 1	SIIR|WEX9|p21|pp21	X	Xq22.1
HMGCLL1		54511	HMGCLL1	3-hydroxymethyl-3-methylglutaryl-CoA lyase-like 1	bA418P12.1|er-cHL	6	6p12.1
TMTC2		160335	TMTC2	transmembrane and tetratricopeptide repeat containing 2	IBDBP1	12	12q21.31
BARHL1		56751	BARHL1	BarH-like homeobox 1	-	9	9q34
NR2E3		10002	NR2E3	nuclear receptor subfamily 2, group E, member 3	ESCS|PNR|RNR|RP37|rd7	15	15q23
CABP4		57010	CABP4	calcium binding protein 4	CRSD|CSNB2B	11	11q13.2
NAGS		162417	NAGS	N-acetylglutamate synthase	AGAS|ARGA	17	17q21.31
PON1		5444	PON1	paraoxonase 1	ESA|MVCD5|PON	7	7q21.3
TRIM6-TRIM34		445372	TRIM6-TRIM34	TRIM6-TRIM34 readthrough	IFP1|RNF21|TRIM34	11	11p15
RSF1		51773	RSF1	remodeling and spacing factor 1	HBXAP|RSF-1|XAP8|p325	11	11q14.1
GDPD5		81544	GDPD5	glycerophosphodiester phosphodiesterase domain containing 5	GDE2|PP1665	11	11q13.4-q13.5
FCHSD2		9873	FCHSD2	FCH and double SH3 domains 2	NWK|SH3MD3	11	11q13.4
RELT		84957	RELT	RELT tumor necrosis factor receptor	TNFRSF19L|TRLT	11	11q13.4
TNRC18		84629	TNRC18	trinucleotide repeat containing 18	CAGL79|TNRC18A	7	7p22.1
CFL1		1072	CFL1	cofilin 1 (non-muscle)	CFL|HEL-S-15|cofilin	11	11q13
ZDHHC11		79844	ZDHHC11	zinc finger, DHHC-type containing 11	ZNF399	5	5p15.33
EGLN2		112398	EGLN2	egl-9 family hypoxia-inducible factor 2	EIT6|HIF-PH1|HIFPH1|HPH-1|HPH-3|PHD1	19	19q13.2
ADARB2		105	ADARB2	adenosine deaminase, RNA-specific, B2 (non-functional)	ADAR3|RED2	10	10p15.3
UPP2		151531	UPP2	uridine phosphorylase 2	UDRPASE2|UP2|UPASE2	2	2q24.1
COL2A1		1280	COL2A1	collagen, type II, alpha 1	ANFH|AOM|COL11A3|SEDC|STL1	12	12q13.11
NUMA1		4926	NUMA1	nuclear mitotic apparatus protein 1	NMP-22|NUMA	11	11q13
ARRB1		408	ARRB1	arrestin, beta 1	ARB1|ARR1	11	11q13
GLCE		26035	GLCE	glucuronic acid epimerase	HSEPI	15	15q23
DPY19L2		283417	DPY19L2	dpy-19-like 2 (C. elegans)	SPATA34|SPGF9	12	12q14.2
RNF169		254225	RNF169	ring finger protein 169	-	11	11q13.4
OR2T5		401993	OR2T5	olfactory receptor, family 2, subfamily T, member 5	OR1-62	1	1q44
TPPP		11076	TPPP	tubulin polymerization promoting protein	TPPP/p25|TPPP1|p24|p25|p25alpha	5	5p15.3
ANK1		286	ANK1	ankyrin 1, erythrocytic	ANK|SPH1|SPH2	8	8p11.1
PELI3		246330	PELI3	pellino E3 ubiquitin protein ligase family member 3	-	11	11q13.2
MCC		4163	MCC	mutated in colorectal cancers	MCC1	5	5q21
LRRN1		57633	LRRN1	leucine rich repeat neuronal 1	FIGLER3|NLRR-1	3	3p26.2
RANBP3L		202151	RANBP3L	RAN binding protein 3-like	-	5	5p13.2
ARHGEF17		9828	ARHGEF17	Rho guanine nucleotide exchange factor (GEF) 17	P164RHOGEF|TEM4|p164-RhoGEF	11	11q13.4
CDYL2		124359	CDYL2	chromodomain protein, Y-like 2	PCCP1	16	16q23.2
ATG16L2		89849	ATG16L2	autophagy related 16-like 2	ATG16B|WDR80	11	11q13.4
RAI2		10742	RAI2	retinoic acid induced 2	-	X	Xp22
SEMA3F		6405	SEMA3F	sema domain, immunoglobulin domain (Ig), short basic domain, secreted, (semaphorin) 3F	SEMA-IV|SEMA4|SEMAK	3	3p21.3
KDM4B		23030	KDM4B	lysine (K)-specific demethylase 4B	JMJD2B|TDRD14B	19	19p13.3
IGFBP5		3488	IGFBP5	insulin-like growth factor binding protein 5	IBP5	2	2q35
CTSF		8722	CTSF	cathepsin F	CATSF|CLN13	11	11q13
NHS		4810	NHS	Nance-Horan syndrome (congenital cataracts and dental anomalies)	CTRCT40|CXN|SCML1	X	Xp22.13
HAL		3034	HAL	histidine ammonia-lyase	HIS|HSTD	12	12q22-q24.1
ADAM28		10863	ADAM28	ADAM metallopeptidase domain 28	ADAM 28|MDC-L|MDCL|eMDC II|eMDCII	8	8p21.2
FFAR1		2864	FFAR1	free fatty acid receptor 1	FFA1R|GPCR40|GPR40	19	19q13.1
ST6GALNAC5		81849	ST6GALNAC5	ST6 (alpha-N-acetyl-neuraminyl-2,3-beta-galactosyl-1,3)-N-acetylgalactosaminide alpha-2,6-sialyltransferase 5	SIAT7E|ST6GalNAcV	1	1p31.1
ITPR2		3709	ITPR2	inositol 1,4,5-trisphosphate receptor, type 2	ANHD|CFAP48|INSP3R2|IP3R2	12	12p11
GATA3		2625	GATA3	GATA binding protein 3	HDR|HDRS	10	10p15
OR6B3		150681	OR6B3	olfactory receptor, family 6, subfamily B, member 3	OR6B3P|OR6B3Q	2	2q37.3
ARAP1		116985	ARAP1	ArfGAP with RhoGAP domain, ankyrin repeat and PH domain 1	CENTD2	11	11q13.4
DRAP1		10589	DRAP1	DR1-associated protein 1 (negative cofactor 2 alpha)	NC2-alpha	11	11q13.3
ALB		213	ALB	albumin	ANALBA|FDAH|PRO0883|PRO0903|PRO1341	4	4q13.3
FAM169A		26049	FAM169A	family with sequence similarity 169, member A	SLAP75	5	5q13.3
RNF128		79589	RNF128	ring finger protein 128, E3 ubiquitin protein ligase	GRAIL	X	Xq22.3
THAP1		55145	THAP1	THAP domain containing, apoptosis associated protein 1	DYT6	8	8p11.21
F3		2152	F3	coagulation factor III (thromboplastin, tissue factor)	CD142|TF|TFA	1	1p22-p21
RBM4B		83759	RBM4B	RNA binding motif protein 4B	RBM30|RBM4L|ZCCHC15|ZCCHC21B|ZCRB3B	11	11q13
B4GAT1		11041	B4GAT1	beta-1,4-glucuronyltransferase 1	B3GN-T1|B3GNT1|B3GNT6|BETA3GNTI|MDDGA13|iGAT|iGNT	11	11q13.2
DOK6		220164	DOK6	docking protein 6	DOK5L|HsT3226	18	18q22.2
GLDN		342035	GLDN	gliomedin	CLOM|COLM|CRG-L2|CRGL2|UNC-112	15	15q21.2
EIF1AD		84285	EIF1AD	eukaryotic translation initiation factor 1A domain containing	haponin	11	11q13.1
RHOD		29984	RHOD	ras homolog family member D	ARHD|RHOHP1|RHOM|Rho	11	11q14.3
XRRA1		143570	XRRA1	X-ray radiation resistance associated 1	-	11	11q13.4
PTPRT		11122	PTPRT	protein tyrosine phosphatase, receptor type, T	RPTPrho	20	20q12-q13
DLGAP1		9229	DLGAP1	discs, large (Drosophila) homolog-associated protein 1	DAP-1|DAP-1-ALPHA|DAP-1-BETA|DAP1|DLGAP1A|DLGAP1B|GKAP|SAPAP1	18	18p11.31
STXBP5		134957	STXBP5	syntaxin binding protein 5 (tomosyn)	LGL3|LLGL3|Nbla04300	6	6q24.3
AP5B1		91056	AP5B1	adaptor-related protein complex 5, beta 1 subunit	AP-5|PP1030	11	11q13.1
KRBA2		124751	KRBA2	KRAB-A domain containing 2	-	17	17p13.1
ZNF281		23528	ZNF281	zinc finger protein 281	ZBP-99|ZNP-99	1	1q32.1
TLE3		7090	TLE3	transducin-like enhancer of split 3	ESG|ESG3|GRG3|HsT18976	15	15q22
JADE2		23338	JADE2	jade family PHD finger 2	JADE-2|PHF15	5	5q31.1
CCS		9973	CCS	copper chaperone for superoxide dismutase	-	11	11q13
SORCS1		114815	SORCS1	sortilin-related VPS10 domain containing receptor 1	hSorCS	10	10q23-q25
FAM110B		90362	FAM110B	family with sequence similarity 110, member B	C8orf72	8	8q12.1
RAD9A		5883	RAD9A	RAD9 checkpoint clamp component A	RAD9	11	11q13.1-q13.2
TP53TG5		27296	TP53TG5	TP53 target 5	C20orf10|CLG01	20	20q13.12
ARNTL		406	ARNTL	aryl hydrocarbon receptor nuclear translocator-like	BMAL1|BMAL1c|JAP3|MOP3|PASD3|TIC|bHLHe5	11	11p15
ULK2		9706	ULK2	unc-51 like autophagy activating kinase 2	ATG1B|Unc51.2	17	17p11.2
NKX2-8		26257	NKX2-8	NK2 homeobox 8	NKX2.8|NKX2H|Nkx2-9	14	14q13.3
CHTOP		26097	CHTOP	chromatin target of PRMT1	C1orf77|FL-SRAG|FOP|SRAG|SRAG-3|SRAG-5|pp7704	1	1q21.3
GOLGA7		51125	GOLGA7	golgin A7	GCP16|GOLGA3AP1|GOLGA7A|HSPC041	8	8p11.21
PHLDB2		90102	PHLDB2	pleckstrin homology-like domain, family B, member 2	LL5b|LL5beta	3	3q13.2
ARMT1		79624	ARMT1	acidic residue methyltransferase 1	C6orf211	6	6q25.1
IFNA17		3451	IFNA17	interferon, alpha 17	IFN-alphaI|IFNA|INFA|LEIF2C1	9	9p22
CHST10		9486	CHST10	carbohydrate sulfotransferase 10	HNK-1ST|HNK1ST	2	2q11.2
CCDC74A		90557	CCDC74A	coiled-coil domain containing 74A	-	2	2q21.1
MOV10L1		54456	MOV10L1	Mov10 RISC complex RNA helicase like 1	CHAMP|DJ402G11.8	22	22q13.33
SH3BP5L		80851	SH3BP5L	SH3-binding domain protein 5-like	-	1	1q44
RBM4		5936	RBM4	RNA binding motif protein 4	LARK|RBM4A|ZCCHC21|ZCRB3A	11	11q13
WNK3		65267	WNK3	WNK lysine deficient protein kinase 3	PRKWNK3	X	Xp11.22
ADGRG2		10149	ADGRG2	adhesion G protein-coupled receptor G2	EDDM6|GPR64|HE6|TM7LN2	X	Xp22.13
SART1		9092	SART1	squamous cell carcinoma antigen recognized by T cells 1	Ara1|HOMS1|SART1259|SNRNP110|Snu66	11	11q13.1
ACER3		55331	ACER3	alkaline ceramidase 3	APHC|PHCA	11	11q13.5

## Sheet: Cellular component
Cellular component of Co-expressed genes with CHRNA6
Analysis: Cellular component
Dataset name: CHRNA6 Co-expressed2
Number of genes in the dataset: 145
Number of genes in the dataset (which are available in Cellular component database) :111
Number of genes in background: 14553
Is analysis quantitative: No
						Corrected p-values
Cellular component	No. of genes in the dataset	No. of genes in the background dataset	Percentage of genes	Fold enrichment	P-value (Hypergeometric test)	Bonferroni method	BH method	Q-value (Storey-Tibshirani method)	genes mapped (from input data set)
Plasma membrane	28	3479	25.2252	1.05548	0.407638	1	1	1	PAK1; FGFR3; RAB6A; MYO7A; GP2; ADRA1B; RGS8; GPC3; NEU3; SLC4A8; ITGB8; PON1; CFL1; ARRB1; ANK1; MCC; SEMA3F; ADAM28; FFAR1; ITPR2; F3; DOK6; RHOD; PTPRT; STXBP5; SORCS1; PHLDB2; ADGRG2;
Integral to membrane	17	1702	15.3153	1.31019	0.148638	1	1	1	AQP11; SLC22A17; GDPD4; FGFR3; OR2G6; OR2T34; TMEM26; ZDHHC11; OR2T5; ANK1; MCC; LRRN1; OR6B3; F3; PTPRT; GOLGA7; ADGRG2;
Integral to plasma membrane	7	934	6.30631	0.983914	0.574671	1	1	1	SLC22A17; FGFR3; ADRA1B; GPC3; NEU3; FFAR1; ADGRG2;
Golgi aparatus	12	897	10.8108	1.75524	0.0405571	1	1	1	PAK1; RAB6A; KLC2; RAB1B; MGAT4A; GLCE; ARAP1; RNF128; B4GAT1; GOLGA7; CHST10; ACER3;
Nucleus	47	5847	42.3423	1.05402	0.353804	1	1	1	TEX14; FGFR3; ESRRB; KAT6A; ATP2A3; KLC2; AFF3; CCND1; RGS8; BMP2K; NOVA1; MUS81; SF3B2; FOXD4L4; FIBP; TCEAL1; BARHL1; NR2E3; RSF1; CFL1; EGLN2; NUMA1; ARRB1; RNF169; TPPP; MCC; CDYL2; IGFBP5; NHS; GATA3; ARAP1; DRAP1; ALB; THAP1; XRRA1; KRBA2; ZNF281; TLE3; CCS; RAD9A; TP53TG5; ARNTL; NKX2-8; CHTOP; RBM4; ADGRG2; SART1;
Perinuclear region of cytoplasm	1	119	0.900901	1.11257	0.599425	1	1	1	TPPP;
Nucleolus	6	1257	5.40541	0.626796	0.925657	1	1	1	SF3B2; FOXD4L4; ADARB2; NUMA1; RAD9A; RBM4;
Mitochondrion	8	1259	7.20721	0.834054	0.75473	1	1	1	ATP2A3; RAB1B; FIBP; NAGS; CFL1; NUMA1; PTPRT; FAM110B;
Cytosol	11	1178	9.90991	1.22526	0.286465	1	1	1	PAK1; MYO7A; KLC2; CCND1; RAB1B; CFL1; UPP2; NUMA1; ARHGEF17; HAL; SART1;
Membrane fraction	3	346	2.7027	1.14043	0.493833	1	1	1	FIBP; ARRB1; CHST10;
Cytoplasm	39	5684	35.1351	0.899729	0.828209	1	1	1	PAK1; AFP; FGFR3; RAB6A; MYO7A; GP2; KLC2; CCND1; NOVA1; BBS1; SF3B2; RSF1; CFL1; EGLN2; UPP2; NUMA1; ARRB1; TPPP; ANK1; MCC; SEMA3F; IGFBP5; HAL; ARAP1; ALB; RBM4B; XRRA1; STXBP5; TLE3; JADE2; CCS; FAM110B; RAD9A; TP53TG5; ARNTL; ULK2; GOLGA7; PHLDB2; SART1;
Exosomes	14	2043	12.6126	0.898997	0.708372	1	1	1	TEX14; RAB6A; KIF12; RAB1B; MGAT4A; ITGB8; PON1; CFL1; NUMA1; CTSF; ALB; JADE2; GOLGA7; ADGRG2;
Chromatin	1	32	0.900901	4.13644	0.217508	1	1	1	ARRB1;
Lysosome	14	1620	12.6126	1.13373	0.351869	1	1	1	RAB6A; GPC3; RAB1B; GDPD5; CFL1; ARRB1; CTSF; ITPR2; ALB; F3; RHOD; STXBP5; AP5B1; GOLGA7;
Endoplasmic reticulum	8	1104	7.20721	0.951153	0.612146	1	1	1	CYP4X1; ATP2A3; RAB1B; FIBP; TMTC2; CABP4; RNF128; ACER3;
Secretory granule	1	50	0.900901	2.64762	0.318511	1	1	1	GP2;
Endosome	3	303	2.7027	1.30227	0.408054	1	1	1	ARRB1; RNF128; RHOD;
Cell surface	2	205	1.8018	1.28532	0.465232	1	1	1	AQP11; PTPRT;
Spectrin-associated cytoskeleton	1	5	0.900901	26.4286	0.0375642	1	1	1	ANK1;
Extracellular	13	1825	11.7117	0.93455	0.6473	1	1	1	AFP; FGFR3; GP2; COL28A1; GPC3; PON1; CFL1; COL2A1; SEMA3F; IGFBP5; ALB; F3; IFNA17;
Extracellular region	5	442	4.5045	1.48592	0.248196	1	1	1	CABP4; PON1; COL2A1; IGFBP5; ALB;
Integrin complex	1	22	0.900901	6.01578	0.155124	1	1	1	ITGB8;
Membrane	2	350	1.8018	0.752846	0.750683	1	1	1	FIBP; SORCS1;
Extracellular space	4	404	3.6036	1.3012	0.371294	1	1	1	PON1; SEMA3F; ALB; F3;
Extracellular matrix	1	120	0.900901	1.1033	0.602506	1	1	1	F3;
Endoplasmic reticulum membrane	1	150	0.900901	0.882657	0.68476	1	1	1	ACER3;
Nucleoplasm	3	449	2.7027	0.878823	0.670286	1	1	1	CCND1; NUMA1; SART1;
Centrosome	2	656	1.8018	0.401676	0.963193	1	1	1	CFL1; FAM110B;
Soluble fraction	2	180	1.8018	1.46383	0.400069	1	1	1	ARRB1; CCS;
Integral to Golgi membrane	2	19	1.8018	13.8613	0.00905828	1	0.887712	1	B4GAT1; ACER3;
Cytoskeleton	4	427	3.6036	1.23111	0.411147	1	1	1	CFL1; TPPP; ANK1; ALB;
Intracellular	1	151	0.900901	0.876812	0.68719	1	1	1	CCND1;
Platelet alpha granule lumen	1	35	0.900901	3.78199	0.235317	1	1	1	ALB;
Microtubule	2	129	1.8018	2.04251	0.25826	1	1	1	NUMA1; TPPP;
Integrator complex	1	13	0.900901	10.1774	0.0947789	1	1	1	INTS4;
Sarcoplasmic reticulum membrane	1	6	0.900901	22.0312	0.0449075	1	1	1	ITPR2;
Protein complex	2	65	1.8018	4.05328	0.0879918	1	1	1	KLC2; ALB;
Spherical high-density lipoprotein particle	1	8	0.900901	16.5303	0.059428	1	1	1	PON1;
Spindle	1	30	0.900901	4.41211	0.205408	1	1	1	NUMA1;
Transcription factor complex	1	43	0.900901	3.07852	0.280867	1	1	1	ARNTL;
Nuclear membrane	1	78	0.900901	1.69731	0.45053	1	1	1	ATP2A3;
Late endosome	1	40	0.900901	3.30936	0.264109	1	1	1	RNF128;
Spindle pole	1	24	0.900901	5.51468	0.167983	1	1	1	NUMA1;
Microsome	4	156	3.6036	3.36963	0.031479	1	1	1	KLC2; FIBP; CABP4; CFL1;
Microtubule cytoskeleton	1	47	0.900901	2.81658	0.302623	1	1	1	TPPP;
Cell junction	1	38	0.900901	3.48349	0.252724	1	1	1	KLC2;
Lysosomal membrane	1	14	0.900901	9.45092	0.10169	1	1	1	MYO7A;
Plasma membrane enriched fraction	1	4	0.900901	33.0193	0.030165	1	1	1	ITPR2;
Spliceosomal complex	1	46	0.900901	2.8778	0.297246	1	1	1	SF3B2;
High-density lipoprotein particle	1	11	0.900901	12.0261	0.0807994	1	1	1	PON1;
Basolateral plasma membrane	1	40	0.900901	3.30936	0.264109	1	1	1	ANK1;
Integral to endoplasmic reticulum membrane	1	31	0.900901	4.26983	0.211481	1	1	1	ACER3;
Photoreceptor outer segment	1	5	0.900901	26.4286	0.0375642	1	1	1	MYO7A;
Heterotrimeric G-protein complex	1	11	0.900901	12.0261	0.0807994	1	1	1	ARRB1;
Histone acetyltransferase complex	1	5	0.900901	26.4286	0.0375642	1	1	1	JADE2;
Spindle microtubule	1	24	0.900901	5.51468	0.167983	1	1	1	NUMA1;
Cytoplasmic vesicle	6	160	5.40541	4.924	0.00140814	1	0.367994	1	FGFR3; RAB6A; RAB1B; ARRB1; STXBP5; PHLDB2;
Cyclin-dependent protein kinase holoenzyme complex	1	7	0.900901	18.8884	0.0521953	1	1	1	CCND1;
Photoreceptor inner segment	1	4	0.900901	33.0193	0.030165	1	1	1	MYO7A;
Collagen type II	1	1	0.900901	131.096	0.00762729	1	0.854257	1	COL2A1;
BBSome	1	7	0.900901	18.8884	0.0521953	1	1	1	BBS1;
Others	1	51	0.900901	2.59571	0.323727	1	1	1	PHLDB2;
Platelet dense tubular network membrane	1	3	0.900901	43.9892	0.0227093	1	1	1	ITPR2;
Synapse	4	33	3.6036	15.9254	0.000110599	0.0867098	0.0867098	0.546139	MYO7A; PCDH20; CABP4; DLGAP1;
RSF complex	1	2	0.900901	65.8743	0.0151969	1	1	1	RSF1;
MOZ/MORF histone acetyltransferase complex	1	8	0.900901	16.5303	0.059428	1	1	1	KAT6A;
Cajal body	1	21	0.900901	6.30211	0.148621	1	1	1	SART1;
Sarcoplasmic reticulum	2	32	1.8018	8.23192	0.0246404	1	1	1	ATP2A3; ANK1;
Cell projection	1	41	0.900901	3.22866	0.269738	1	1	1	PAK1;
Type III intermediate filament	1	1	0.900901	131.096	0.00762729	1	0.854257	1	UPP2;
Integral to organelle membrane	1	1	0.900901	131.096	0.00762729	1	0.854257	1	SLC22A17;
Terminal button	1	1	0.900901	131.096	0.00762729	1	0.854257	1	CABP4;
Perinuclear vesicle (None)	2	5	1.8018	52.5956	0.000567965	0.445284	0.222642	1	FGFR3; KLC2;

## Sheet: Molecular function
Molecular function of Co-expressed genes with CHRNA6
Analysis: Molecular function
Dataset name: CHRNA6 Co-expressed2
Number of genes in the dataset: 145
Number of genes in the dataset (which are available in Molecular function database) :144
Number of genes in background: 18125
Is analysis quantitative: No
						Corrected p-values
Molecular function	No. of genes in the dataset	No. of genes in the background dataset	Percentage of genes	Fold enrichment	P-value (Hypergeometric test)	Bonferroni method	BH method	Q-value (Storey-Tibshirani method)	genes mapped (from input data set)
Molecular function unknown	43	5685	29.8611	0.95219	0.681553	1	1	1	FOXI2; CCDC177; GDPD4; GP2; CCDC170; CNTN3; RASSF6; GPC3; CCDC74B; LETM2; DENND1B; BBS1; FAM168A; FIBP; TMEM26; ZNF703; TMTC2; NAGS; TRIM6-TRIM34; GDPD5; FCHSD2; RELT; TNRC18; ZDHHC11; DPY19L2; PELI3; MCC; LRRN1; RANBP3L; ATG16L2; RAI2; KDM4B; NHS; EIF1AD; XRRA1; DLGAP1; AP5B1; FAM110B; TP53TG5; CHTOP; ARMT1; CCDC74A; SART1;
Acyltransferase activity	1	80	0.694444	1.58878	0.472457	1	1	1	KAT6A;
Cell adhesion molecule activity	2	356	1.38889	0.710591	0.777941	1	1	1	PCDH20; IGFBP5;
Transporter activity	5	576	3.47222	1.0947	0.484464	1	1	1	AFP; ITPR2; ALB; STXBP5; GOLGA7;
ATPase activity	1	111	0.694444	1.1451	0.588566	1	1	1	ATP2A3;
Catalytic activity	1	532	0.694444	0.238939	0.986529	1	1	1	CYP4X1;
Transferase activity	2	156	1.38889	1.62155	0.352263	1	1	1	MGAT4A; B4GAT1;
GTPase activator activity	3	144	2.08333	2.63063	0.107179	1	1	1	RGS8; RGS21; ARAP1;
Oxidoreductase activity	1	161	0.694444	0.789504	0.724716	1	1	1	CYP4A22;
Ion channel activity	1	66	0.694444	1.92574	0.409864	1	1	1	SLC22A17;
Hydrolase activity	3	203	2.08333	1.8661	0.218968	1	1	1	NEU3; PON1; ACER3;
Receptor binding	1	129	0.694444	0.985334	0.643935	1	1	1	SEMA3F;
Structural molecule activity	2	269	1.38889	0.940401	0.633128	1	1	1	NUMA1; GLDN;
Structural constituent of cytoskeleton	1	137	0.694444	0.927801	0.666104	1	1	1	TPPP;
Cytoskeletal protein binding	2	218	1.38889	1.16039	0.518861	1	1	1	CFL1; PHLDB2;
Deaminase activity	1	19	0.694444	6.6869	0.140694	1	1	1	ADARB2;
Metallopeptidase activity	1	101	0.694444	1.25847	0.554194	1	1	1	ADAM28;
G-protein coupled receptor activity	7	736	4.86111	1.19873	0.368538	1	1	1	ADRA1B; OR2G6; OR2T34; OR2T5; FFAR1; OR6B3; ADGRG2;
Protein serine/threonine kinase activity	3	301	2.08333	1.25855	0.429291	1	1	1	PAK1; BMP2K; WNK3;
Lyase activity	2	21	1.38889	12.0408	0.0119237	1	1	1	HMGCLL1; HAL;
Transcription regulator activity	10	832	6.94444	1.51423	0.126341	1	1	1	ESRRB; INTS4; TCEAL1; RSF1; RNF169; DRAP1; KRBA2; ZNF281; TLE3; JADE2;
Extracellular matrix structural constituent	2	166	1.38889	1.52387	0.380791	1	1	1	COL28A1; COL2A1;
Receptor activity	1	361	0.694444	0.352118	0.94545	1	1	1	ITGB8;
Ligand-dependent nuclear receptor activity	1	35	0.694444	3.6309	0.243795	1	1	1	NR2E3;
Transcription factor activity	6	842	4.16667	0.898344	0.664422	1	1	1	AFF3; FOXD4L4; BARHL1; GATA3; ARNTL; NKX2-8;
Receptor signaling complex scaffold activity	3	322	2.08333	1.17648	0.472854	1	1	1	ARRB1; ANK1; DOK6;
Calcium ion binding	1	185	0.694444	0.687087	0.773097	1	1	1	CABP4;
Transmembrane receptor protein tyrosine kinase activity	1	56	0.694444	2.26956	0.360692	1	1	1	FGFR3;
Ubiquitin-specific protease activity	2	377	1.38889	0.67101	0.804447	1	1	1	EGLN2; RNF128;
Growth factor activity	1	110	0.694444	1.15551	0.585251	1	1	1	ULK2;
Binding	1	22	0.694444	5.77546	0.161035	1	1	1	FGFR3;
Protein binding	1	182	0.694444	0.698412	0.767545	1	1	1	SH3BP5L;
RNA binding	5	366	3.47222	1.72278	0.166939	1	1	1	NOVA1; SF3B2; RBM4B; MOV10L1; RBM4;
Water channel activity	1	14	0.694444	9.07337	0.105698	1	1	1	AQP11;
GTPase activity	3	222	2.08333	1.70639	0.259032	1	1	1	RAB6A; RAB1B; RHOD;
DNA binding	4	654	2.77778	0.771695	0.767745	1	1	1	LONRF2; CDYL2; THAP1; RAD9A;
Chaperone activity	1	126	0.694444	1.00879	0.63525	1	1	1	CCS;
Auxiliary transport protein activity	1	333	0.694444	0.381724	0.9315	1	1	1	SLC4A8;
Motor activity	3	79	2.08333	4.79479	0.0250463	1	1	1	MYO7A; KLC2; KIF12;
Kinase binding	1	16	0.694444	7.93991	0.119863	1	1	1	CCND1;
Cysteine-type peptidase activity	1	46	0.694444	2.76283	0.307453	1	1	1	CTSF;
Guanyl-nucleotide exchange factor activity	1	112	0.694444	1.13488	0.591855	1	1	1	ARHGEF17;
Protein threonine/tyrosine kinase activity	1	28	0.694444	4.53831	0.200294	1	1	1	TEX14;
Cytokine activity	1	107	0.694444	1.18791	0.575145	1	1	1	IFNA17;
Transmembrane receptor activity	1	52	0.694444	2.44411	0.339903	1	1	1	SORCS1;
Deoxyribonuclease activity	1	17	0.694444	7.47313	0.126862	1	1	1	MUS81;
Cofactor binding	1	1	0.694444	125.859	0.00794483	1	1	1	F3;
Racemase and epimerase activity	1	11	0.694444	11.5457	0.0840252	1	1	1	GLCE;
Phosphorylase activity	1	20	0.694444	6.35272	0.147528	1	1	1	UPP2;
Sulfotransferase activity	1	53	0.694444	2.398	0.345162	1	1	1	CHST10;
Ubiquitin binding	1	9	0.694444	14.1085	0.0692876	1	1	1	ANKRD13D;
Receptor signaling protein tyrosine phosphatase activity	1	16	0.694444	7.93991	0.119863	1	1	1	PTPRT;
Sialyltransferase activity	1	19	0.694444	6.6869	0.140694	1	1	1	ST6GALNAC5;

## Sheet: Biological process
Biological process of Co-expressed genes with CHRNA6
Analysis: Biological process
Dataset name: CHRNA6 Co-expressed2
Number of genes in the dataset: 145
Number of genes in the dataset (which are available in Biological process database) :144
Number of genes in background: 18124
Is analysis quantitative: No
						Corrected p-values
Biological process	No. of genes in the dataset	No. of genes in the background dataset	Percentage of genes	Fold enrichment	P-value (Hypergeometric test)	Bonferroni method	BH method	Q-value (Storey-Tibshirani method)	genes mapped (from input data set)
Biological_process unknown	38	4731	26.3889	1.01113	0.500782	1	1	1	FOXI2; CCDC177; GDPD4; FGFR3; GP2; CCDC170; CNTN3; RASSF6; CCDC74B; LETM2; DENND1B; BBS1; FAM168A; TMEM26; ZNF703; ANKRD13D; TMTC2; TRIM6-TRIM34; GDPD5; FCHSD2; RELT; TNRC18; ZDHHC11; DPY19L2; LRRN1; RANBP3L; ATG16L2; RAI2; KDM4B; NHS; EIF1AD; DLGAP1; AP5B1; CHTOP; ARMT1; CCDC74A; WNK3; SART1;
Protein metabolism	7	1323	4.86111	0.666832	0.908367	1	1	1	NEU3; EGLN2; CTSF; ADAM28; RNF128; F3; CCS;
Metabolism	12	1683	8.33333	0.898086	0.695467	1	1	1	CYP4A22; CYP4X1; MGAT4A; HMGCLL1; NAGS; PON1; GLCE; HAL; ST6GALNAC5; B4GAT1; CHST10; ACER3;
Energy pathways	12	1633	8.33333	0.925584	0.654631	1	1	1	CYP4A22; CYP4X1; MGAT4A; HMGCLL1; NAGS; PON1; GLCE; HAL; ST6GALNAC5; B4GAT1; CHST10; ACER3;
Cell growth and/or maintenance	10	1125	6.94444	1.1198	0.404102	1	1	1	MYO7A; KAT6A; COL28A1; KLC2; KIF12; CFL1; COL2A1; NUMA1; TPPP; GLDN;
Transport	5	1215	3.47222	0.518943	0.968309	1	1	1	AQP11; AFP; SLC4A8; ALB; GOLGA7;
Cell communication	37	3713	25.6944	1.25445	0.0760994	1	1	1	TEX14; PAK1; RAB6A; ADRA1B; OR2G6; CCND1; RGS8; GPC3; BMP2K; RAB1B; OR2T34; FIBP; ITGB8; CABP4; ARRB1; OR2T5; ANK1; PELI3; MCC; ARHGEF17; SEMA3F; IGFBP5; FFAR1; ITPR2; OR6B3; ARAP1; DOK6; RHOD; PTPRT; STXBP5; SORCS1; TP53TG5; ULK2; PHLDB2; IFNA17; SH3BP5L; ADGRG2;
Signal transduction	37	3934	25.6944	1.18398	0.144025	1	1	1	TEX14; PAK1; RAB6A; ADRA1B; OR2G6; CCND1; RGS8; GPC3; BMP2K; RAB1B; OR2T34; RGS21; FIBP; ITGB8; CABP4; ARRB1; OR2T5; ANK1; PELI3; MCC; ARHGEF17; SEMA3F; IGFBP5; FFAR1; ITPR2; OR6B3; ARAP1; DOK6; RHOD; PTPRT; STXBP5; SORCS1; TP53TG5; ULK2; PHLDB2; IFNA17; ADGRG2;
Regulation of nucleobase, nucleoside, nucleotide and nucleic acid metabolism	25	2828	17.3611	1.113	0.312664	1	1	1	ESRRB; KAT6A; LONRF2; INTS4; NOVA1; MUS81; SF3B2; FOXD4L4; TCEAL1; BARHL1; RSF1; ADARB2; UPP2; RNF169; CDYL2; DRAP1; RBM4B; KRBA2; ZNF281; TLE3; JADE2; RAD9A; NKX2-8; MOV10L1; RBM4;
Ion transport	2	48	1.38889	5.26897	0.055766	1	1	1	SLC22A17; ATP2A3;
Regulation of circadian rhythm	1	1	0.694444	125.852	0.00794527	1	0.471419	1	ARNTL;
Cell cycle	1	22	0.694444	5.77515	0.161043	1	1	1	FAM110B;
Apoptosis	2	220	1.38889	1.14978	0.52379	1	1	1	RASSF6; THAP1;
Regulation of gene expression, epigenetic	3	66	2.08333	5.73876	0.0156111	1	0.694695	1	AFF3; NR2E3; GATA3;
Cell adhesion	1	54	0.694444	2.35347	0.350395	1	1	1	PCDH20;
Cell proliferation	1	39	0.694444	3.25842	0.267602	1	1	1	XRRA1;
Cell differentiation	1	29	0.694444	4.38163	0.206667	1	1	1	XRRA1;
Cell development	1	13	0.694444	9.77025	0.0985363	1	1	1	XRRA1;
Cell-cell signaling	1	16	0.694444	7.93947	0.119869	1	1	1	SH3BP5L;
Enzyme linked receptor protein signaling pathway	1	1	0.694444	125.852	0.00794527	1	0.471419	1	FGFR3;
Cellular morphogenesis during differentiation	1	3	0.694444	42.2296	0.0236482	1	0.841876	1	FGFR3;
G-protein signaling, coupled to cyclic nucleotide second messenger	1	1	0.694444	125.852	0.00794527	1	0.471419	1	RGS21;

## Sheet: Biological pathway
Biological pathway of Co-expressed genes with CHRNA6
Analysis: Biological pathway
Dataset name: CHRNA6 Co-expressed2
Number of genes in the dataset: 145
Number of genes in the dataset (which are available in Biological pathway database) :49
Number of genes in background: 6290
Is analysis quantitative: No
						Corrected p-values
Biological pathway	No. of genes in the dataset	No. of genes in the background dataset	Percentage of genes	Fold enrichment	P-value (Hypergeometric test)	Bonferroni method	BH method	Q-value (Storey-Tibshirani method)	genes mapped (from input data set)
Developmental Biology	4	432	8.16327	1.19129	0.437133	1	1	1	PAK1; CFL1; ANK1; DRAP1;
Axon guidance	3	219	6.12245	1.76388	0.242605	1	1	1	PAK1; CFL1; ANK1;
Semaphorin interactions	2	64	4.08163	4.03009	0.0883788	1	1	1	PAK1; CFL1;
Sema3A PAK dependent Axon repulsion	2	15	4.08163	17.1863	0.00585164	1	1	1	PAK1; CFL1;
CHL1 interactions	1	5	2.04082	25.8732	0.0383606	1	1	1	ANK1;
Signal transduction by L1	2	35	4.08163	7.36836	0.0300415	1	1	1	PAK1; ANK1;
NrCAM interactions	1	7	2.04082	18.4914	0.0532978	1	1	1	ANK1;
Neurofascin interactions	1	9	2.04082	14.3868	0.0680077	1	1	1	ANK1;
L1CAM interactions	2	79	4.08163	3.26498	0.125667	1	1	1	PAK1; ANK1;
Interaction between L1 and Ankyrins	1	12	2.04082	10.7931	0.0896537	1	1	1	ANK1;
Reduction of cytosolic Ca++ levels	1	10	2.04082	12.9495	0.0752785	1	1	1	ATP2A3;
Platelet calcium homeostasis	1	16	2.04082	8.09649	0.11775	1	1	1	ATP2A3;
Platelet activation, signaling and aggregation	2	138	4.08163	1.86918	0.29219	1	1	1	CFL1; ARRB1;
Signaling by NODAL	1	16	2.04082	8.09649	0.11775	1	1	1	DRAP1;
Hemostasis	7	375	14.2857	2.39906	0.0248904	1	1	1	ATP2A3; KLC2; CFL1; ARRB1; GATA3; F3; IFNA17;
Platelet homeostasis	1	40	2.04082	3.23981	0.269337	1	1	1	ATP2A3;
Platelet degranulation	1	28	2.04082	4.6278	0.197041	1	1	1	CFL1;
Response to elevated platelet cytosolic Ca2+	1	39	2.04082	3.32286	0.263565	1	1	1	CFL1;
Formation of Fibrin Clot (Clotting Cascade)	1	33	2.04082	3.92683	0.227978	1	1	1	F3;
Extrinsic Pathway	1	5	2.04082	25.8732	0.0383606	1	1	1	F3;
Thrombin signalling through proteinase activated receptors (PARs)	1	17	2.04082	7.6205	0.124641	1	1	1	ARRB1;
Factors involved in megakaryocyte development and platelet production	3	119	6.12245	3.24601	0.0649077	1	1	1	KLC2; GATA3; IFNA17;
Kinesins	1	21	2.04082	6.16967	0.151679	1	1	1	KLC2;
FGFR3 ligand binding and activation	1	2	2.04082	64.4899	0.0155208	1	1	1	FGFR3;
FGFR3b ligand binding and activation	1	2	2.04082	64.4899	0.0155208	1	1	1	FGFR3;
FGFR3c ligand binding and activation	1	2	2.04082	64.4899	0.0155208	1	1	1	FGFR3;
FGFR ligand binding and activation	1	14	2.04082	9.2523	0.10381	1	1	1	FGFR3;
Signaling by FGFR	1	95	2.04082	1.36433	0.526968	1	1	1	FGFR3;
Signal Transduction	9	1208	18.3673	0.95724	0.616864	1	1	1	FGFR3; ADRA1B; OR2G6; OR2T34; ITGB8; COL2A1; OR2T5; FFAR1; OR6B3;
Recruitment of NuMA to mitotic centrosomes	1	12	2.04082	10.7931	0.0896537	1	1	1	NUMA1;
Ubiquitin-dependent degradation of Cyclin D	1	66	2.04082	1.96371	0.404801	1	1	1	CCND1;
Ubiquitin-dependent degradation of Cyclin D1	1	66	2.04082	1.96371	0.404801	1	1	1	CCND1;
Mitotic G2-G2/M phases	1	99	2.04082	1.30921	0.54176	1	1	1	NUMA1;
G2/M Transition	1	96	2.04082	1.35012	0.530709	1	1	1	NUMA1;
Recruitment of mitotic centrosome proteins and complexes	1	70	2.04082	1.85152	0.423328	1	1	1	NUMA1;
Centrosome maturation	1	70	2.04082	1.85152	0.423328	1	1	1	NUMA1;
S Phase	1	121	2.04082	1.07119	0.615372	1	1	1	CCND1;
G1 Phase	1	31	2.04082	4.1801	0.215746	1	1	1	CCND1;
Mitotic G1-G1/S phases	1	140	2.04082	0.925825	0.669523	1	1	1	CCND1;
Cell Cycle, Mitotic	2	317	4.08163	0.813748	0.715475	1	1	1	CCND1; NUMA1;
Cyclin D associated events in G1	1	31	2.04082	4.1801	0.215746	1	1	1	CCND1;
mRNA Splicing - Minor Pathway	1	42	2.04082	3.08557	0.28075	1	1	1	SF3B2;
mRNA Splicing - Major Pathway	1	107	2.04082	1.21133	0.569999	1	1	1	SF3B2;
mRNA Splicing	1	107	2.04082	1.21133	0.569999	1	1	1	SF3B2;
Processing of Capped Intron-Containing Pre-mRNA	1	138	2.04082	0.939242	0.664195	1	1	1	SF3B2;
mRNA Processing	1	157	2.04082	0.825583	0.711594	1	1	1	SF3B2;
Regulation of Insulin-like Growth Factor (IGF) Activity by Insulin-like Growth Factor Binding Proteins (IGFBPs)	1	14	2.04082	9.2523	0.10381	1	1	1	IGFBP5;
Diabetes pathways	1	216	2.04082	0.600087	0.820741	1	1	1	IGFBP5;
Nucleosome assembly	1	35	2.04082	3.70251	0.240024	1	1	1	RSF1;
Deposition of New CENPA-containing Nucleosomes at the Centromere	1	35	2.04082	3.70251	0.240024	1	1	1	RSF1;
Chromosome Maintenance	1	69	2.04082	1.87835	0.41875	1	1	1	RSF1;
Signaling by GPCR	6	800	12.2449	0.964152	0.604576	1	1	1	ADRA1B; OR2G6; OR2T34; OR2T5; FFAR1; OR6B3;
GPCR ligand binding	2	336	4.08163	0.767733	0.7456	1	1	1	ADRA1B; FFAR1;
Class A/1 (Rhodopsin-like receptors)	2	274	4.08163	0.941448	0.636652	1	1	1	ADRA1B; FFAR1;
GPCR downstream signaling	6	530	12.2449	1.45532	0.228266	1	1	1	ADRA1B; OR2G6; OR2T34; OR2T5; FFAR1; OR6B3;
G alpha (12/13) signalling events	1	21	2.04082	6.16967	0.151679	1	1	1	ADRA1B;
G alpha (q) signalling events	2	120	4.08163	2.14954	0.239911	1	1	1	ADRA1B; FFAR1;
Olfactory Signaling Pathway	4	349	8.16327	1.4746	0.287883	1	1	1	OR2G6; OR2T34; OR2T5; OR6B3;
Amine ligand-binding receptors	1	36	2.04082	3.59969	0.245977	1	1	1	ADRA1B;
Adrenoceptors	1	9	2.04082	14.3868	0.0680077	1	1	1	ADRA1B;
Free fatty acid receptors	1	4	2.04082	32.3254	0.0308056	1	1	1	FFAR1;
Adaptive Immune System	1	237	2.04082	0.546917	0.848823	1	1	1	PAK1;
TCR signaling	1	47	2.04082	2.75739	0.308524	1	1	1	PAK1;
Immune System	3	522	6.12245	0.740038	0.785168	1	1	1	PAK1; PELI3; IFNA17;
Formation and Maturation of mRNA Transcript	1	185	2.04082	0.700637	0.769727	1	1	1	SF3B2;
Integrin cell surface interactions	2	72	4.08163	3.58237	0.107814	1	1	1	ITGB8; COL2A1;
Gene Expression	1	378	2.04082	0.342914	0.952588	1	1	1	SF3B2;
Sphingolipid metabolism	1	29	2.04082	4.46828	0.203324	1	1	1	ACER3;
Bile acid and bile salt metabolism	1	27	2.04082	4.79914	0.190709	1	1	1	ALB;
Recycling of bile acids and salts	1	11	2.04082	11.7734	0.0824937	1	1	1	ALB;
Metabolism	3	823	6.12245	0.469384	0.964181	1	1	1	NAGS; HAL; FFAR1;
G1/S DNA Damage Checkpoints	1	76	2.04082	1.70536	0.450065	1	1	1	CCND1;
Cell Cycle Checkpoints	2	118	4.08163	2.18597	0.234124	1	1	1	CCND1; RAD9A;
N-Glycan antennae elongation	1	9	2.04082	14.3868	0.0680077	1	1	1	MGAT4A;
G2/M Checkpoints	1	43	2.04082	3.01383	0.286391	1	1	1	RAD9A;
p53-Independent G1/S DNA damage checkpoint	1	70	2.04082	1.85152	0.423328	1	1	1	CCND1;
Ubiquitin Mediated Degradation of Phosphorylated Cdc25A	1	69	2.04082	1.87835	0.41875	1	1	1	CCND1;
p53-Independent DNA Damage Response	1	70	2.04082	1.85152	0.423328	1	1	1	CCND1;
Activation of ATR in response to replication stress	1	37	2.04082	3.50243	0.251885	1	1	1	RAD9A;
Asparagine N-linked glycosylation	1	77	2.04082	1.68322	0.454402	1	1	1	MGAT4A;
N-glycan antennae elongation in the medial/trans-Golgi	1	12	2.04082	10.7931	0.0896537	1	1	1	MGAT4A;
Transport to the Golgi and subsequent modification	1	28	2.04082	4.6278	0.197041	1	1	1	MGAT4A;
Post-translational protein modification	1	114	2.04082	1.13696	0.593305	1	1	1	MGAT4A;
Metabolism of proteins	1	259	2.04082	0.500462	0.873617	1	1	1	MGAT4A;
trans-Golgi Network Vesicle Budding	1	33	2.04082	3.92683	0.227978	1	1	1	ARRB1;
Clathrin derived vesicle budding	1	33	2.04082	3.92683	0.227978	1	1	1	ARRB1;
Golgi Associated Vesicle Biogenesis	1	27	2.04082	4.79914	0.190709	1	1	1	ARRB1;
Lysosome Vesicle Biogenesis	1	15	2.04082	8.63589	0.110807	1	1	1	ARRB1;
Membrane Trafficking	1	84	2.04082	1.54297	0.483833	1	1	1	ARRB1;
Regulation of Insulin Secretion	1	48	2.04082	2.69995	0.313951	1	1	1	FFAR1;
Integration of energy metabolism	1	83	2.04082	1.56156	0.479726	1	1	1	FFAR1;
Urea cycle	1	9	2.04082	14.3868	0.0680077	1	1	1	NAGS;
Incretin Synthesis, Secretion, and Inactivation	1	21	2.04082	6.16967	0.151679	1	1	1	FFAR1;
Synthesis, Secretion, and Inactivation of Glucagon-like Peptide-1 (GLP-1)	1	18	2.04082	7.19738	0.131479	1	1	1	FFAR1;
Synthesis, Secretion, and Inactivation of Glucose-dependent Insulinotropic Polypeptide (GIP)	1	13	2.04082	9.96347	0.096759	1	1	1	FFAR1;
Regulation of Insulin Secretion by Free Fatty Acids	1	1	2.04082	128.341	0.00779014	1	1	1	FFAR1;
Regulation of Insulin Secretion by Fatty Acids Bound to GPR40 (FFAR1)	1	1	2.04082	128.341	0.00779014	1	1	1	FFAR1;
Metabolism of amino acids and derivatives	2	188	4.08163	1.37209	0.433207	1	1	1	NAGS; HAL;
Histidine catabolism	1	4	2.04082	32.3254	0.0308056	1	1	1	HAL;
BMAL1:CLOCK/NPAS2 Activates Gene Expression	1	23	2.04082	5.63341	0.16489	1	1	1	ARNTL;
Circadian Clock	1	32	2.04082	4.04951	0.221886	1	1	1	ARNTL;
Lipoprotein metabolism	1	27	2.04082	4.79914	0.190709	1	1	1	ALB;
HDL-mediated lipid transport	1	15	2.04082	8.63589	0.110807	1	1	1	ALB;
Cell-Cell communication	1	117	2.04082	1.10781	0.60291	1	1	1	PAK1;
Transmembrane transport of small molecules	3	378	6.12245	1.02195	0.571806	1	1	1	ATP2A3; SLC4A8; ALB;
Transport of inorganic cations/anions and amino acids/oligopeptides	1	94	2.04082	1.37884	0.523197	1	1	1	SLC4A8;
Bicarbonate transporters	1	9	2.04082	14.3868	0.0680077	1	1	1	SLC4A8;
SLC-mediated transmembrane transport	2	247	4.08163	1.04436	0.579273	1	1	1	SLC4A8; ALB;
DSCAM interactions	1	9	2.04082	14.3868	0.0680077	1	1	1	PAK1;
Ion channel transport	1	46	2.04082	2.81732	0.303054	1	1	1	ATP2A3;
Lipid digestion, mobilization, and transport	1	46	2.04082	2.81732	0.303054	1	1	1	ALB;
Metabolism of lipids and lipoproteins	2	257	4.08163	1.00372	0.601242	1	1	1	ALB; ACER3;
Ion transport by P-type ATPases	1	29	2.04082	4.46828	0.203324	1	1	1	ATP2A3;
Transport of vitamins, nucleosides, and related molecules	1	30	2.04082	4.31939	0.209559	1	1	1	ALB;
Transport of organic anions	1	10	2.04082	12.9495	0.0752785	1	1	1	ALB;
CD28 co-stimulation	1	36	2.04082	3.59969	0.245977	1	1	1	PAK1;
CD28 dependent Vav1 pathway	1	18	2.04082	7.19738	0.131479	1	1	1	PAK1;
Generation of second messenger molecules	1	19	2.04082	6.81877	0.138264	1	1	1	PAK1;
Costimulation by the CD28 family	1	52	2.04082	2.4923	0.335246	1	1	1	PAK1;
Regulation of Apoptosis	1	75	2.04082	1.7281	0.445695	1	1	1	CCND1;
Regulation of activated PAK-2p34 by proteasome mediated degradation	1	66	2.04082	1.96371	0.404801	1	1	1	CCND1;
Apoptosis	1	158	2.04082	0.820358	0.713898	1	1	1	CCND1;
Innate Immune System	1	183	2.04082	0.708293	0.765987	1	1	1	IFNA17;
RIG-I/MDA5 mediated induction of IFN-alpha/beta pathways	1	67	2.04082	1.93441	0.409486	1	1	1	IFNA17;
TRAF6 mediated IRF7 activation	1	25	2.04082	5.18292	0.177899	1	1	1	IFNA17;
Cytokine Signaling in Immune system	2	193	4.08163	1.33654	0.446593	1	1	1	PELI3; IFNA17;
Interferon alpha/beta signaling	1	77	2.04082	1.68322	0.454402	1	1	1	IFNA17;
Interferon Signaling	1	98	2.04082	1.32257	0.538105	1	1	1	IFNA17;
Regulation of IFNA signaling	1	38	2.04082	3.41028	0.257747	1	1	1	IFNA17;
Interleukin-1 signaling	1	39	2.04082	3.32286	0.263565	1	1	1	PELI3;
Signaling by Interleukins	1	92	2.04082	1.40881	0.515567	1	1	1	PELI3;
salvage pathways of pyrimidine ribonucleotides	1	15	2.04082	8.63589	0.110807	1	1	1	UPP2;
glycerol degradation I	2	9	4.08163	28.6311	0.00206702	1	1	1	GDPD4; GDPD5;
histidine degradation III	1	7	2.04082	18.4914	0.0532978	1	1	1	HAL;
leucine degradation I	1	7	2.04082	18.4914	0.0532978	1	1	1	HMGCLL1;
acetone degradation I (to methylglyoxal)	1	7	2.04082	18.4914	0.0532978	1	1	1	CYP4X1;
melatonin degradation I	1	3	2.04082	43.0647	0.0231925	1	1	1	CYP4X1;
superpathway of melatonin degradation	1	5	2.04082	25.8732	0.0383606	1	1	1	CYP4X1;
bupropion degradation	1	4	2.04082	32.3254	0.0308056	1	1	1	CYP4X1;
nicotine degradation II	1	11	2.04082	11.7734	0.0824937	1	1	1	CYP4X1;
nicotine degradation III	1	6	2.04082	21.5682	0.0458578	1	1	1	CYP4X1;
Wnt signaling network	1	200	2.04082	0.648091	0.795974	1	1	1	CCND1;
CXCR3-mediated signaling events	1	37	2.04082	3.50243	0.251885	1	1	1	ARRB1;
Regulation of cytoplasmic and nuclear SMAD2/3 signaling	4	305	8.16327	1.68732	0.212406	1	1	1	PAK1; CCND1; GATA3; RNF128;
Validated targets of C-MYC transcriptional repression	1	63	2.04082	2.05721	0.390523	1	1	1	CCND1;
EphrinA-EPHA pathway	1	43	2.04082	3.01383	0.286391	1	1	1	PAK1;
Circadian rhythm pathway	1	16	2.04082	8.09649	0.11775	1	1	1	ARNTL;
Syndecan-1-mediated signaling events	10	1297	20.4082	0.990507	0.571552	1	1	1	PAK1; AFP; FGFR3; CCND1; ARRB1; GATA3; ARAP1; RNF128; ULK2; IFNA17;
Downstream signaling in na&#xef;ve CD8+ T cells	1	65	2.04082	1.99392	0.400078	1	1	1	IFNA17;
Regulation of CDC42 activity	9	768	18.3673	1.50565	0.136288	1	1	1	PAK1; AFP; CCND1; CFL1; ARHGEF17; GATA3; ARAP1; RNF128; IFNA17;
Notch-mediated HES/HEY network	2	94	4.08163	2.74403	0.165982	1	1	1	CCND1; GATA3;
Glypican pathway	11	1335	22.449	1.05845	0.47267	1	1	1	PAK1; AFP; FGFR3; CCND1; GPC3; ARRB1; GATA3; ARAP1; RNF128; ULK2; IFNA17;
GMCSF-mediated signaling events	10	1289	20.4082	0.996654	0.562852	1	1	1	PAK1; AFP; FGFR3; CCND1; ARRB1; GATA3; ARAP1; RNF128; ULK2; IFNA17;
IL27-mediated signaling events	1	26	2.04082	4.98365	0.184328	1	1	1	GATA3;
Insulin Pathway	10	1285	20.4082	0.999756	0.55848	1	1	1	PAK1; AFP; FGFR3; CCND1; ARRB1; GATA3; ARAP1; RNF128; ULK2; IFNA17;
C-MYC pathway	1	149	2.04082	0.869907	0.692494	1	1	1	CCND1;
Stabilization and expansion of the E-cadherin adherens junction	2	275	4.08163	0.938025	0.638659	1	1	1	FGFR3; CCND1;
FOXA transcription factor networks	2	81	4.08163	3.18437	0.130893	1	1	1	AFP; ALB;
Glypican 3 network	2	206	4.08163	1.2522	0.480589	1	1	1	CCND1; GPC3;
Nectin adhesion pathway	10	1292	20.4082	0.99434	0.566121	1	1	1	PAK1; AFP; FGFR3; CCND1; ARRB1; GATA3; ARAP1; RNF128; ULK2; IFNA17;
FGF signaling pathway	1	48	2.04082	2.69995	0.313951	1	1	1	FGFR3;
Neurotrophic factor-mediated Trk receptor signaling	1	101	2.04082	1.28329	0.548986	1	1	1	CCND1;
TRAIL signaling pathway	11	1325	22.449	1.06644	0.461695	1	1	1	PAK1; AFP; FGFR3; CCND1; NUMA1; ARRB1; GATA3; ARAP1; RNF128; ULK2; IFNA17;
LPA receptor mediated events	1	100	2.04082	1.29612	0.545387	1	1	1	ADRA1B;
IGF1 pathway	10	1288	20.4082	0.997428	0.56176	1	1	1	PAK1; AFP; FGFR3; CCND1; ARRB1; GATA3; ARAP1; RNF128; ULK2; IFNA17;
PLK1 signaling events	1	104	2.04082	1.24627	0.559616	1	1	1	PAK1;
ATF-2 transcription factor network	1	59	2.04082	2.19666	0.370964	1	1	1	CCND1;
CDC42 signaling events	9	755	18.3673	1.53158	0.126178	1	1	1	PAK1; AFP; CCND1; CFL1; ARHGEF17; GATA3; ARAP1; RNF128; IFNA17;
Signaling events mediated by Hepatocyte Growth Factor Receptor (c-Met)	10	1290	20.4082	0.995881	0.563943	1	1	1	PAK1; AFP; FGFR3; CCND1; ARRB1; GATA3; ARAP1; RNF128; ULK2; IFNA17;
Glypican 1 network	10	1296	20.4082	0.991271	0.570468	1	1	1	PAK1; AFP; FGFR3; CCND1; ARRB1; GATA3; ARAP1; RNF128; ULK2; IFNA17;
N-cadherin signaling events	2	251	4.08163	1.02771	0.588162	1	1	1	FGFR3; CCND1;
PDGF receptor signaling network	10	1290	20.4082	0.995881	0.563943	1	1	1	PAK1; AFP; FGFR3; CCND1; ARRB1; GATA3; ARAP1; RNF128; ULK2; IFNA17;
EphrinB-EPHB pathway	1	60	2.04082	2.16005	0.375911	1	1	1	PAK1;
Integrin family cell surface interactions	13	1375	26.5306	1.21433	0.261082	1	1	1	PAK1; AFP; FGFR3; CCND1; ITGB8; COL2A1; ARRB1; ADAM28; GATA3; ARAP1; RNF128; ULK2; IFNA17;
IL1-mediated signaling events	4	234	8.16327	2.19926	0.107958	1	1	1	PAK1; CCND1; GATA3; RNF128;
Caspase cascade in apoptosis	1	52	2.04082	2.4923	0.335246	1	1	1	NUMA1;
Calcineurin-regulated NFAT-dependent transcription in lymphocytes	2	49	4.08163	5.26354	0.055446	1	1	1	GATA3; RNF128;
Fanconi anemia pathway	1	48	2.04082	2.69995	0.313951	1	1	1	RAD9A;
S1P2 pathway	1	26	2.04082	4.98365	0.184328	1	1	1	PAK1;
Coregulation of Androgen receptor activity	1	61	2.04082	2.12465	0.380819	1	1	1	CCND1;
Regulation of Telomerase	2	68	4.08163	3.79306	0.0979557	1	1	1	CCND1; RAD9A;
Internalization of ErbB1	10	1285	20.4082	0.999756	0.55848	1	1	1	PAK1; AFP; FGFR3; CCND1; ARRB1; GATA3; ARAP1; RNF128; ULK2; IFNA17;
TGF-beta receptor signaling	4	305	8.16327	1.68732	0.212406	1	1	1	PAK1; CCND1; GATA3; RNF128;
FOXA2 and FOXA3 transcription factor networks	2	43	4.08163	5.99782	0.0438398	1	1	1	AFP; ALB;
Posttranslational regulation of adherens junction stability and dissassembly	2	231	4.08163	1.11669	0.54238	1	1	1	FGFR3; CCND1;
Signaling events mediated by VEGFR1 and VEGFR2	10	1293	20.4082	0.993571	0.567209	1	1	1	PAK1; AFP; FGFR3; CCND1; ARRB1; GATA3; ARAP1; RNF128; ULK2; IFNA17;
Beta1 integrin cell surface interactions	12	1348	24.4898	1.14345	0.352894	1	1	1	PAK1; AFP; FGFR3; CCND1; COL2A1; ARRB1; ADAM28; GATA3; ARAP1; RNF128; ULK2; IFNA17;
Urokinase-type plasminogen activator (uPA) and uPAR-mediated signaling	10	1285	20.4082	0.999756	0.55848	1	1	1	PAK1; AFP; FGFR3; CCND1; ARRB1; GATA3; ARAP1; RNF128; ULK2; IFNA17;
TCR signaling in na&#xef;ve CD8+ T cells	1	127	2.04082	1.02059	0.633349	1	1	1	IFNA17;
Signaling by Aurora kinases	1	98	2.04082	1.32257	0.538105	1	1	1	PAK1;
Validated nuclear estrogen receptor alpha network	1	64	2.04082	2.02507	0.395319	1	1	1	CCND1;
Polo-like kinase signaling events in the cell cycle	1	109	2.04082	1.18911	0.576789	1	1	1	PAK1;
IFN-gamma pathway	10	1293	20.4082	0.993571	0.567209	1	1	1	PAK1; AFP; FGFR3; CCND1; ARRB1; GATA3; ARAP1; RNF128; ULK2; IFNA17;
Regulation of RAC1 activity	5	205	10.2041	3.13638	0.020873	1	1	1	PAK1; CCND1; CFL1; ARHGEF17; ARAP1;
PAR1-mediated thrombin signaling events	10	1296	20.4082	0.991271	0.570468	1	1	1	PAK1; AFP; FGFR3; CCND1; ARRB1; GATA3; ARAP1; RNF128; ULK2; IFNA17;
Noncanonical Wnt signaling pathway	1	182	2.04082	0.712185	0.764094	1	1	1	CCND1;
Regulation of p38-alpha and p38-beta	3	164	6.12245	2.35539	0.134886	1	1	1	PAK1; GATA3; RNF128;
Alpha4 beta1 integrin signaling events	1	33	2.04082	3.92683	0.227978	1	1	1	ADAM28;
PDGFR-beta signaling pathway	10	1285	20.4082	0.999756	0.55848	1	1	1	PAK1; AFP; FGFR3; CCND1; ARRB1; GATA3; ARAP1; RNF128; ULK2; IFNA17;
Canonical Wnt signaling pathway	1	155	2.04082	0.836235	0.706931	1	1	1	CCND1;
HIF-2-alpha transcription factor network	1	34	2.04082	3.81137	0.234024	1	1	1	EGLN2;
E-cadherin signaling in the nascent adherens junction	2	275	4.08163	0.938025	0.638659	1	1	1	FGFR3; CCND1;
EPHB forward signaling	1	40	2.04082	3.23981	0.269337	1	1	1	PAK1;
Integrin-linked kinase signaling	6	654	12.2449	1.17939	0.401418	1	1	1	PAK1; AFP; CCND1; GATA3; RNF128; IFNA17;
Regulation of nuclear beta catenin signaling and target gene transcription	1	135	2.04082	0.960112	0.656044	1	1	1	CCND1;
p38 MAPK signaling pathway	4	189	8.16327	2.72287	0.0586367	1	1	1	PAK1; CCND1; GATA3; RNF128;
EGF receptor (ErbB1) signaling pathway	10	1285	20.4082	0.999756	0.55848	1	1	1	PAK1; AFP; FGFR3; CCND1; ARRB1; GATA3; ARAP1; RNF128; ULK2; IFNA17;
p75(NTR)-mediated signaling	1	178	2.04082	0.728188	0.756373	1	1	1	CCND1;
Thrombin/protease-activated receptor (PAR) pathway	10	1297	20.4082	0.990507	0.571552	1	1	1	PAK1; AFP; FGFR3; CCND1; ARRB1; GATA3; ARAP1; RNF128; ULK2; IFNA17;
Class I PI3K signaling events	10	1285	20.4082	0.999756	0.55848	1	1	1	PAK1; AFP; FGFR3; CCND1; ARRB1; GATA3; ARAP1; RNF128; ULK2; IFNA17;
Arf6 signaling events	10	1285	20.4082	0.999756	0.55848	1	1	1	PAK1; AFP; FGFR3; CCND1; ARRB1; GATA3; ARAP1; RNF128; ULK2; IFNA17;
Plasma membrane estrogen receptor signaling	10	1298	20.4082	0.989744	0.572635	1	1	1	PAK1; AFP; FGFR3; CCND1; ARRB1; GATA3; ARAP1; RNF128; ULK2; IFNA17;
FAS (CD95) signaling pathway	1	130	2.04082	0.997037	0.642027	1	1	1	NUMA1;
C-MYB transcription factor network	2	84	4.08163	3.07066	0.138827	1	1	1	CCND1; GATA3;
p73 transcription factor network	1	78	2.04082	1.66164	0.458704	1	1	1	AFP;
FOXM1 transcription factor network	1	42	2.04082	3.08557	0.28075	1	1	1	CCND1;
IL3-mediated signaling events	10	1292	20.4082	0.99434	0.566121	1	1	1	PAK1; AFP; FGFR3; CCND1; ARRB1; GATA3; ARAP1; RNF128; ULK2; IFNA17;
AP-1 transcription factor network	6	621	12.2449	1.24206	0.353715	1	1	1	PAK1; AFP; CCND1; GATA3; RNF128; IFNA17;
Signaling events regulated by Ret tyrosine kinase	1	69	2.04082	1.87835	0.41875	1	1	1	DOK6;
Hypoxic and oxygen homeostasis regulation of HIF-1-alpha	1	80	2.04082	1.62011	0.467211	1	1	1	EGLN2;
Glucocorticoid receptor signaling	2	85	4.08163	3.03454	0.141496	1	1	1	AFP; GATA3;
mTOR signaling pathway	10	1285	20.4082	0.999756	0.55848	1	1	1	PAK1; AFP; FGFR3; CCND1; ARRB1; GATA3; ARAP1; RNF128; ULK2; IFNA17;
RAC1 signaling pathway	5	205	10.2041	3.13638	0.020873	1	1	1	PAK1; CCND1; CFL1; ARHGEF17; ARAP1;
ErbB receptor signaling network	10	1308	20.4082	0.982177	0.583414	1	1	1	PAK1; AFP; FGFR3; CCND1; ARRB1; GATA3; ARAP1; RNF128; ULK2; IFNA17;
Signaling events mediated by focal adhesion kinase	10	1285	20.4082	0.999756	0.55848	1	1	1	PAK1; AFP; FGFR3; CCND1; ARRB1; GATA3; ARAP1; RNF128; ULK2; IFNA17;
VEGF and VEGFR signaling network	10	1301	20.4082	0.987461	0.575879	1	1	1	PAK1; AFP; FGFR3; CCND1; ARRB1; GATA3; ARAP1; RNF128; ULK2; IFNA17;
Glucocorticoid receptor regulatory network	2	80	4.08163	3.22417	0.128273	1	1	1	AFP; GATA3;
Alpha9 beta1 integrin signaling events	10	1302	20.4082	0.986703	0.576959	1	1	1	PAK1; AFP; FGFR3; CCND1; ARRB1; GATA3; ARAP1; RNF128; ULK2; IFNA17;
IL8- and CXCR1-mediated signaling events	1	28	2.04082	4.6278	0.197041	1	1	1	ARRB1;
Syndecan-2-mediated signaling events	1	77	2.04082	1.68322	0.454402	1	1	1	FGFR3;
ALK1 pathway	4	324	8.16327	1.58837	0.244316	1	1	1	PAK1; CCND1; GATA3; RNF128;
Arf6 downstream pathway	10	1285	20.4082	0.999756	0.55848	1	1	1	PAK1; AFP; FGFR3; CCND1; ARRB1; GATA3; ARAP1; RNF128; ULK2; IFNA17;
Role of Calcineurin-dependent NFAT signaling in lymphocytes	2	95	4.08163	2.71515	0.16875	1	1	1	GATA3; RNF128;
Validated transcriptional targets of AP1 family members Fra1 and Fra2	4	134	8.16327	3.84038	0.0199105	1	1	1	CCND1; GATA3; RNF128; IFNA17;
CXCR4-mediated signaling events	2	190	4.08163	1.35765	0.438581	1	1	1	PAK1; CFL1;
S1P1 pathway	10	1285	20.4082	0.999756	0.55848	1	1	1	PAK1; AFP; FGFR3; CCND1; ARRB1; GATA3; ARAP1; RNF128; ULK2; IFNA17;
Netrin-mediated signaling events	1	32	2.04082	4.04951	0.221886	1	1	1	PAK1;
EPHA2 forward signaling	1	19	2.04082	6.81877	0.138264	1	1	1	PAK1;
ATM pathway	2	307	4.08163	0.840253	0.698488	1	1	1	AFP; RAD9A;
TNF receptor signaling pathway	5	299	10.2041	2.1504	0.0815235	1	1	1	PAK1; CCND1; NUMA1; GATA3; RNF128;
p53 pathway	1	189	2.04082	0.685809	0.777033	1	1	1	AFP;
ErbB1 downstream signaling	10	1285	20.4082	0.999756	0.55848	1	1	1	PAK1; AFP; FGFR3; CCND1; ARRB1; GATA3; ARAP1; RNF128; ULK2; IFNA17;
EGFR-dependent Endothelin signaling events	10	1286	20.4082	0.998979	0.559575	1	1	1	PAK1; AFP; FGFR3; CCND1; ARRB1; GATA3; ARAP1; RNF128; ULK2; IFNA17;
Syndecan-4-mediated signaling events	1	209	2.04082	0.620185	0.810291	1	1	1	CCND1;
IL8-mediated signaling events	1	38	2.04082	3.41028	0.257747	1	1	1	ARRB1;
ATR signaling pathway	2	250	4.08163	1.03182	0.585952	1	1	1	AFP; RAD9A;
Regulation of nuclear SMAD2/3 signaling	4	305	8.16327	1.68732	0.212406	1	1	1	PAK1; CCND1; GATA3; RNF128;
ALK1 signaling events	4	321	8.16327	1.60322	0.239199	1	1	1	PAK1; CCND1; GATA3; RNF128;
Angiopoietin receptor Tie2-mediated signaling	1	50	2.04082	2.59198	0.324681	1	1	1	PAK1;
Arf6 trafficking events	10	1285	20.4082	0.999756	0.55848	1	1	1	PAK1; AFP; FGFR3; CCND1; ARRB1; GATA3; ARAP1; RNF128; ULK2; IFNA17;
E-cadherin signaling events	2	280	4.08163	0.921275	0.648568	1	1	1	FGFR3; CCND1;
Androgen-mediated signaling	1	130	2.04082	0.997037	0.642027	1	1	1	CCND1;
Endothelins	10	1304	20.4082	0.98519	0.579114	1	1	1	PAK1; AFP; FGFR3; CCND1; ARRB1; GATA3; ARAP1; RNF128; ULK2; IFNA17;
Beta5 beta6 beta7 and beta8 integrin cell surface interactions	1	17	2.04082	7.6205	0.124641	1	1	1	ITGB8;
Presenilin action in Notch and Wnt signaling	1	46	2.04082	2.81732	0.303054	1	1	1	CCND1;
Regulation of retinoblastoma protein	1	66	2.04082	1.96371	0.404801	1	1	1	CCND1;
Notch signaling pathway	2	94	4.08163	2.74403	0.165982	1	1	1	CCND1; GATA3;
IL5-mediated signaling events	10	1289	20.4082	0.996654	0.562852	1	1	1	PAK1; AFP; FGFR3; CCND1; ARRB1; GATA3; ARAP1; RNF128; ULK2; IFNA17;
Direct p53 effectors	1	138	2.04082	0.939242	0.664195	1	1	1	AFP;
IL12-mediated signaling events	1	111	2.04082	1.16769	0.583472	1	1	1	GATA3;
Sphingosine 1-phosphate (S1P) pathway	10	1308	20.4082	0.982177	0.583414	1	1	1	PAK1; AFP; FGFR3; CCND1; ARRB1; GATA3; ARAP1; RNF128; ULK2; IFNA17;
Regulation of Androgen receptor activity	1	108	2.04082	1.20012	0.573407	1	1	1	CCND1;
Proteoglycan syndecan-mediated signaling events	10	1342	20.4082	0.957293	0.61926	1	1	1	PAK1; AFP; FGFR3; CCND1; ARRB1; GATA3; ARAP1; RNF128; ULK2; IFNA17;
IL8- and CXCR2-mediated signaling events	1	34	2.04082	3.81137	0.234024	1	1	1	ARRB1;
Signaling mediated by p38-gamma and p38-delta	1	11	2.04082	11.7734	0.0824937	1	1	1	CCND1;
BMP receptor signaling	4	226	8.16327	2.27711	0.0980975	1	1	1	PAK1; CCND1; GATA3; RNF128;
Aurora A signaling	1	64	2.04082	2.02507	0.395319	1	1	1	PAK1;
RhoA signaling pathway	5	205	10.2041	3.13638	0.020873	1	1	1	PAK1; CCND1; CFL1; ARHGEF17; ARAP1;
Class I PI3K signaling events mediated by Akt	10	1285	20.4082	0.999756	0.55848	1	1	1	PAK1; AFP; FGFR3; CCND1; ARRB1; GATA3; ARAP1; RNF128; ULK2; IFNA17;
LKB1 signaling events	10	1305	20.4082	0.984435	0.580191	1	1	1	PAK1; AFP; FGFR3; CCND1; ARRB1; GATA3; ARAP1; RNF128; ULK2; IFNA17;
Regulation of RhoA activity	5	205	10.2041	3.13638	0.020873	1	1	1	PAK1; CCND1; CFL1; ARHGEF17; ARAP1;
Trk receptor signaling mediated by PI3K and PLC-gamma	1	63	2.04082	2.05721	0.390523	1	1	1	CCND1;
AndrogenReceptor	1	78	2.04082	1.66164	0.458704	1	1	1	CCND1;
Alpha6Beta4Integrin	1	48	2.04082	2.69995	0.313951	1	1	1	PAK1;
TNF alpha/NF-kB	1	171	2.04082	0.757995	0.742261	1	1	1	MCC;
TGFBR	1	125	2.04082	1.03692	0.62745	1	1	1	CCND1;
Mesenchymal-to-epithelial transition	3	223	6.12245	1.73224	0.251007	1	1	1	FGFR3; RNF128; RHOD;
Epithelial-to-mesenchymal transition	1	185	2.04082	0.700637	0.769727	1	1	1	IGFBP5;

## Sheet: Protein domain
Protein domain of Co-expressed genes with CHRNA6
Analysis: Protein domain
Dataset name: CHRNA6 Co-expressed2
Number of genes in the dataset: 145
Number of genes in the dataset (which are available in Protein domain database) :119
Number of genes in background: 14847
Is analysis quantitative: No
						Corrected p-values
Protein domain	No. of genes in the dataset	No. of genes in the background dataset	Percentage of genes	Fold enrichment	P-value (Hypergeometric test)	Bonferroni method	BH method	Q-value (Storey-Tibshirani method)	genes mapped (from input data set)
coiled coil region	28	2968	23.5294	1.17734	0.194759	1	1	1	TEX14; CCDC177; MYO7A; KAT6A; CCDC170; KLC2; KIF12; CCDC74B; LETM2; SF3B2; MGAT4A; FCHSD2; RELT; TNRC18; NUMA1; RNF169; ANK1; MCC; ATG16L2; ITPR2; THAP1; KRBA2; TLE3; PHLDB2; CCDC74A; SH3BP5L; WNK3; SART1;
signal peptide	30	3668	25.2101	1.02068	0.484347	1	1	1	AFP; SLC22A17; CYP4A22; FGFR3; GP2; COL28A1; CNTN3; GPC3; ITGB8; TMEM26; TMTC2; RELT; COL2A1; NUMA1; ANK1; LRRN1; SEMA3F; IGFBP5; CTSF; ADAM28; ST6GALNAC5; ALB; RNF128; F3; PTPRT; SORCS1; IFNA17; CHST10; MOV10L1; ACER3;
transmembrane domain	37	4771	31.0924	0.967753	0.630222	1	1	1	AQP11; SLC22A17; CYP4A22; GDPD4; FGFR3; CYP4X1; GP2; ATP2A3; ADRA1B; OR2G6; LETM2; OR2T34; PCDH20; SLC4A8; MGAT4A; ITGB8; TMEM26; TMTC2; GDPD5; RELT; ZDHHC11; GLCE; DPY19L2; OR2T5; LRRN1; ADAM28; FFAR1; ITPR2; OR6B3; RNF128; F3; B4GAT1; GLDN; PTPRT; SORCS1; ADGRG2; ACER3;
TPR	3	93	2.52101	4.03731	0.0387127	1	1	1	KLC2; LONRF2; TMTC2;
MyTH4	1	8	0.840336	15.7306	0.0623648	1	1	1	MYO7A;
RhoGAP	1	65	0.840336	1.93819	0.40798	1	1	1	ARAP1;
IG	4	340	3.36134	1.47132	0.290467	1	1	1	FGFR3; CNTN3; SEMA3F; PTPRT;
H15	1	13	0.840336	9.685	0.0993679	1	1	1	KAT6A;
ZnF_C2H2	2	799	1.68067	0.313834	0.989459	1	1	1	ZNF703; ZNF281;
CA	1	114	0.840336	1.10518	0.601849	1	1	1	PCDH20;
EFh	2	144	1.68067	1.74124	0.321233	1	1	1	CABP4; MCC;
UIM	1	22	0.840336	5.72475	0.162361	1	1	1	ANKRD13D;
S_TKc	4	307	3.36134	1.62947	0.232349	1	1	1	PAK1; BMP2K; ULK2; WNK3;
RRM	2	221	1.68067	1.13459	0.531248	1	1	1	RBM4B; RBM4;
Sema	1	30	0.840336	4.19866	0.214676	1	1	1	SEMA3F;
PSI	2	44	1.68067	5.69771	0.0484402	1	1	1	ITGB8; SEMA3F;
RING	5	311	4.20168	2.00964	0.1049	1	1	1	KAT6A; LONRF2; TRIM6-TRIM34; RNF169; RNF128;
SH3	2	216	1.68067	1.16085	0.518934	1	1	1	MYO7A; FCHSD2;
LRRNT	1	99	0.840336	1.27262	0.550375	1	1	1	LRRN1;
LRR	2	233	1.68067	1.07616	0.559926	1	1	1	LRRN1; XRRA1;
LRR_TYP	1	132	0.840336	0.954487	0.655957	1	1	1	LRRN1;
LRRCT	1	90	0.840336	1.39987	0.516378	1	1	1	LRRN1;
IGc2	3	211	2.52101	1.77959	0.239515	1	1	1	FGFR3; CNTN3; LRRN1;
KH	1	40	0.840336	3.14926	0.275534	1	1	1	NOVA1;
IG_like	1	128	0.840336	0.984313	0.644601	1	1	1	FGFR3;
ANK	3	249	2.52101	1.50801	0.322134	1	1	1	TEX14; ANKRD13D; ANK1;
FN3	3	187	2.52101	2.00797	0.18953	1	1	1	CNTN3; LRRN1; PTPRT;
KRAB	1	376	0.840336	0.335102	0.953339	1	1	1	KRBA2;
PAS	1	32	0.840336	3.93633	0.22724	1	1	1	ARNTL;
HLH	1	116	0.840336	1.08613	0.608255	1	1	1	ARNTL;
ZnF_C4	2	46	1.68067	5.45004	0.0524567	1	1	1	ESRRB; NR2E3;
HOLI	2	48	1.68067	5.223	0.0565877	1	1	1	ESRRB; NR2E3;
WD40	3	269	2.52101	1.3959	0.36601	1	1	1	ATG16L2; STXBP5; TLE3;
RGS	2	35	1.68067	7.16242	0.0319114	1	1	1	RGS8; RGS21;
EGF	2	208	1.68067	1.2055	0.498795	1	1	1	ITGB8; ADAM28;
Cation_ATPase_N	1	18	0.840336	6.99622	0.134923	1	1	1	ATP2A3;
VWA	2	84	1.68067	2.98484	0.145784	1	1	1	COL28A1; ITGB8;
VWC	1	38	0.840336	3.31497	0.263749	1	1	1	COL2A1;
RanBD	1	13	0.840336	9.685	0.0993679	1	1	1	RANBP3L;
SPRY	1	77	0.840336	1.63618	0.462726	1	1	1	TRIM6-TRIM34;
IQ	1	84	0.840336	1.49984	0.49231	1	1	1	MYO7A;
CYCLIN	1	37	0.840336	3.40454	0.257785	1	1	1	CCND1;
HOX	2	234	1.68067	1.07156	0.562259	1	1	1	BARHL1; NKX2-8;
FH	2	48	1.68067	5.223	0.0565877	1	1	1	FOXI2; FOXD4L4;
B41	1	51	0.840336	2.47014	0.337087	1	1	1	MYO7A;
RAB	2	64	1.68067	3.91745	0.093226	1	1	1	RAB6A; RAB1B;
PH	3	278	2.52101	1.35071	0.385635	1	1	1	ARAP1; DOK6; PHLDB2;
Arrestin_C	1	10	0.840336	12.5876	0.0773435	1	1	1	ARRB1;
BBOX	1	72	0.840336	1.74978	0.440553	1	1	1	TRIM6-TRIM34;
PAC	1	26	0.840336	4.84436	0.188937	1	1	1	ARNTL;
Cyclin_C	1	17	0.840336	7.40752	0.127925	1	1	1	CCND1;
TyrKc	1	88	0.840336	1.43168	0.508484	1	1	1	FGFR3;
PTPc	1	37	0.840336	3.40454	0.257785	1	1	1	PTPRT;
JmjC	1	33	0.840336	3.81708	0.233447	1	1	1	KDM4B;
GPS	1	33	0.840336	3.81708	0.233447	1	1	1	ADGRG2;
INB	1	8	0.840336	15.7306	0.0623648	1	1	1	ITGB8;
CHROMO	1	34	0.840336	3.70485	0.239605	1	1	1	CDYL2;
STYKc	1	48	0.840336	2.62449	0.320834	1	1	1	TEX14;
ZU5	1	9	0.840336	13.9847	0.0698841	1	1	1	ANK1;
DEATH	1	27	0.840336	4.66501	0.195449	1	1	1	ANK1;
DSRM	1	20	0.840336	6.29694	0.148751	1	1	1	ADARB2;
ADEAMc	1	6	0.840336	20.9654	0.0471449	1	1	1	ADARB2;
TUDOR	1	27	0.840336	4.66501	0.195449	1	1	1	KDM4B;
PHD	4	92	3.36134	5.43707	0.00637623	1	1	1	KAT6A; RSF1; KDM4B; JADE2;
IFabd	1	17	0.840336	7.40752	0.127925	1	1	1	IFNA17;
P4Hc	1	16	0.840336	7.8702	0.120871	1	1	1	EGLN2;
SAM	1	92	0.840336	1.36944	0.524147	1	1	1	ARAP1;
ZnF_C2HC	2	42	1.68067	5.96896	0.0445427	1	1	1	RBM4B; RBM4;
small_GTPase	1	35	0.840336	3.59902	0.245713	1	1	1	RAB6A;
RA	1	31	0.840336	4.06327	0.220983	1	1	1	RASSF6;
MYSc	1	38	0.840336	3.31497	0.263749	1	1	1	MYO7A;
RhoGEF	1	67	0.840336	1.88034	0.417474	1	1	1	ARHGEF17;
MAM	1	17	0.840336	7.40752	0.127925	1	1	1	PTPRT;
TNFR	1	26	0.840336	4.84436	0.188937	1	1	1	RELT;
OLF	1	13	0.840336	9.685	0.0993679	1	1	1	GLDN;
SAP	1	23	0.840336	5.47596	0.169085	1	1	1	SF3B2;
uDENN	1	15	0.840336	8.39453	0.11376	1	1	1	DENND1B;
DENN	1	16	0.840336	7.8702	0.120871	1	1	1	DENND1B;
dDENN	1	16	0.840336	7.8702	0.120871	1	1	1	DENND1B;
HhH1	1	7	0.840336	17.9746	0.0547852	1	1	1	MUS81;
PBD	1	14	0.840336	8.99371	0.106593	1	1	1	PAK1;
DISIN	1	21	0.840336	5.99723	0.155583	1	1	1	ADAM28;
ACR	1	23	0.840336	5.47596	0.169085	1	1	1	ADAM28;
KU	1	17	0.840336	7.40752	0.127925	1	1	1	COL28A1;
RHO	1	20	0.840336	6.29694	0.148751	1	1	1	RHOD;
BAH	1	11	0.840336	11.4443	0.0847437	1	1	1	TNRC18;
ArfGap	1	28	0.840336	4.49846	0.201909	1	1	1	ARAP1;
ADF	1	10	0.840336	12.5876	0.0773435	1	1	1	CFL1;
Pept_C1	1	13	0.840336	9.685	0.0993679	1	1	1	CTSF;
ZP	1	15	0.840336	8.39453	0.11376	1	1	1	GP2;
PTBI	1	12	0.840336	10.4914	0.092085	1	1	1	DOK6;
IRS	1	14	0.840336	8.99371	0.106593	1	1	1	DOK6;
KISc	1	44	0.840336	2.86303	0.298546	1	1	1	KIF12;
JmjN	1	9	0.840336	13.9847	0.0698841	1	1	1	KDM4B;
TY	1	17	0.840336	7.40752	0.127925	1	1	1	IGFBP5;
COLFI	1	11	0.840336	11.4443	0.0847437	1	1	1	COL2A1;
ZnF_GATA	1	12	0.840336	10.4914	0.092085	1	1	1	GATA3;
DM3	1	12	0.840336	10.4914	0.092085	1	1	1	THAP1;
THAP	1	12	0.840336	10.4914	0.092085	1	1	1	THAP1;
IB	1	18	0.840336	6.99622	0.134923	1	1	1	IGFBP5;
PKD	1	9	0.840336	13.9847	0.0698841	1	1	1	SORCS1;
Inhibitor_I29	1	7	0.840336	17.9746	0.0547852	1	1	1	CTSF;
eIF1a	1	3	0.840336	41.8611	0.0238546	1	1	1	EIF1AD;
MIR	1	10	0.840336	12.5876	0.0773435	1	1	1	ITPR2;
ALBUMIN	2	4	1.68067	62.5327	0.000378231	0.366884	0.366884	1	AFP; ALB;
ERCC4	1	5	0.840336	25.1501	0.0394434	1	1	1	MUS81;
VPS10	1	5	0.840336	25.1501	0.0394434	1	1	1	SORCS1;
FoP_duplication	1	2	0.840336	62.6875	0.0159665	1	1	1	CHTOP;
PSP	1	2	0.840336	62.6875	0.0159665	1	1	1	SF3B2;

## Sheet: Site of expression
Site of expression of Co-expressed genes with CHRNA6
Analysis: Site of expression
Dataset name: CHRNA6 Co-expressed2
Number of genes in the dataset: 145
Number of genes in the dataset (which are available in Site of expression database) :141
Number of genes in background: 18297
Is analysis quantitative: No
						Corrected p-values
Site of expression	No. of genes in the dataset	No. of genes in the background dataset	Percentage of genes	Fold enrichment	P-value (Hypergeometric test)	Bonferroni method	BH method	Q-value (Storey-Tibshirani method)	genes mapped (from input data set)
T cells	9	1726	6.38298	0.677348	0.92433	1	1	1	INTS4; SF3B2; CFL1; NUMA1; GATA3; ALB; CHTOP; RBM4; SART1;
Monocyte	14	2842	9.92908	0.639651	0.980069	1	1	1	RAB6A; ATP2A3; KLC2; RAB1B; SF3B2; PON1; CFL1; NUMA1; ANK1; ITPR2; ARAP1; ALB; CHTOP; RBM4;
MDA468	6	760	4.25532	1.02609	0.534557	1	1	1	SF3B2; CFL1; NUMA1; SEMA3F; IGFBP5; ALB;
Small intestine	73	8360	51.773	1.1332	0.0854569	1	1	1	TEX14; PAK1; AFP; SLC22A17; FGFR3; RAB6A; MYO7A; KAT6A; GP2; ATP2A3; KIF12; CCND1; GPC3; BMP2K; RAB1B; LETM2; NOVA1; FAM168A; MGAT4A; RGS21; FIBP; ITGB8; TMEM26; ZNF703; TCEAL1; HMGCLL1; TMTC2; BARHL1; NAGS; PON1; RSF1; EGLN2; ADARB2; UPP2; COL2A1; NUMA1; ARRB1; ANK1; PELI3; LRRN1; ARHGEF17; SEMA3F; IGFBP5; CTSF; NHS; ADAM28; ITPR2; GATA3; ARAP1; DRAP1; ALB; F3; B4GAT1; DOK6; RHOD; XRRA1; PTPRT; …
Breast cancer	62	7467	43.9716	1.07757	0.247175	1	1	1	TEX14; PAK1; AFP; SLC22A17; FGFR3; RAB6A; MYO7A; KAT6A; GP2; ATP2A3; CNTN3; KIF12; CCND1; GPC3; BMP2K; RAB1B; LETM2; NOVA1; MGAT4A; FIBP; ITGB8; TMEM26; ZNF703; HMGCLL1; TMTC2; BARHL1; PON1; RSF1; EGLN2; ADARB2; UPP2; NUMA1; ARRB1; ANK1; LRRN1; ARHGEF17; SEMA3F; IGFBP5; CTSF; NHS; ITPR2; GATA3; ARAP1; DRAP1; ALB; F3; B4GAT1; RHOD; PTPRT; KRBA2; CCS; SORCS1; FAM110B; RAD9A; ULK2; CHTOP; ARMT1; CHS…
Thyroid cancer	58	7281	41.1348	1.03381	0.402982	1	1	1	TEX14; PAK1; AFP; SLC22A17; RAB6A; MYO7A; KAT6A; GP2; ATP2A3; CNTN3; KIF12; CCND1; GPC3; BMP2K; RAB1B; LETM2; NOVA1; MGAT4A; FIBP; ITGB8; TMEM26; ZNF703; HMGCLL1; TMTC2; BARHL1; PON1; RSF1; EGLN2; ADARB2; UPP2; NUMA1; ARRB1; ANK1; LRRN1; ARHGEF17; SEMA3F; IGFBP5; CTSF; NHS; GATA3; ARAP1; DRAP1; ALB; F3; B4GAT1; RHOD; PTPRT; KRBA2; CCS; SORCS1; FAM110B; RAD9A; ULK2; CHTOP; ARMT1; CHST10; WNK3; SAR…
Colon	69	8429	48.9362	1.06235	0.273463	1	1	1	TEX14; PAK1; AFP; SLC22A17; FGFR3; RAB6A; MYO7A; KAT6A; GP2; ATP2A3; KIF12; CCND1; GPC3; BMP2K; RAB1B; LETM2; NOVA1; FAM168A; MGAT4A; RGS21; FIBP; ITGB8; TMEM26; ZNF703; TCEAL1; HMGCLL1; TMTC2; BARHL1; PON1; RSF1; EGLN2; ADARB2; UPP2; COL2A1; NUMA1; ANK1; PELI3; MCC; LRRN1; CDYL2; SEMA3F; IGFBP5; CTSF; NHS; ITPR2; GATA3; ARAP1; DRAP1; ALB; F3; B4GAT1; RHOD; PTPRT; KRBA2; ZNF281; JADE2; CCS; SORCS…
Parathyroid gland	50	5997	35.461	1.08206	0.274835	1	1	1	TEX14; PAK1; AFP; SLC22A17; FGFR3; RAB6A; KAT6A; GP2; ATP2A3; KIF12; GPC3; BMP2K; RAB1B; NOVA1; MGAT4A; FIBP; ITGB8; ZNF703; HMGCLL1; TMTC2; BARHL1; PON1; RSF1; EGLN2; ADARB2; NUMA1; ARRB1; ANK1; LRRN1; ARHGEF17; IGFBP5; CTSF; NHS; ITPR2; ARAP1; DRAP1; F3; B4GAT1; PTPRT; KRBA2; CCS; SORCS1; FAM110B; ULK2; CHTOP; ARMT1; CHST10; MOV10L1; WNK3; ADGRG2;
Cervix, uterine	56	6391	39.7163	1.13717	0.134235	1	1	1	TEX14; PAK1; AFP; SLC22A17; RAB6A; MYO7A; KAT6A; GP2; ATP2A3; KIF12; CCND1; GPC3; BMP2K; RAB1B; LETM2; NOVA1; MGAT4A; FIBP; ITGB8; TMEM26; ZNF703; HMGCLL1; TMTC2; BARHL1; PON1; RSF1; EGLN2; ADARB2; UPP2; NUMA1; ARRB1; ANK1; LRRN1; SEMA3F; IGFBP5; CTSF; NHS; ITPR2; GATA3; ARAP1; DRAP1; ALB; F3; B4GAT1; RHOD; PTPRT; KRBA2; CCS; SORCS1; FAM110B; RAD9A; ULK2; CHTOP; ARMT1; CHST10; SART1;
Spleen	73	7887	51.773	1.20116	0.0231305	1	1	1	TEX14; PAK1; AFP; SLC22A17; RAB6A; MYO7A; KAT6A; GP2; ATP2A3; ADRA1B; AFF3; KIF12; CCND1; GPC3; BMP2K; RAB1B; NOVA1; FAM168A; MGAT4A; RGS21; ITGB8; TMEM26; ZNF703; TCEAL1; TMTC2; BARHL1; PON1; RSF1; FCHSD2; TNRC18; EGLN2; ADARB2; UPP2; NUMA1; ARRB1; DPY19L2; RNF169; PELI3; LRRN1; ARHGEF17; CDYL2; ATG16L2; KDM4B; IGFBP5; CTSF; NHS; ADAM28; FFAR1; ITPR2; GATA3; ARAP1; DRAP1; F3; B4GAT1; RHOD; PTPRT…
HUVEC	111	13061	78.7234	1.10285	0.0300889	1	1	1	TEX14; AFP; SLC22A17; GDPD4; FGFR3; RAB6A; MYO7A; ESRRB; KAT6A; GP2; ATP2A3; ADRA1B; OR2G6; COL28A1; CCDC170; KLC2; AFF3; CNTN3; KIF12; RASSF6; CCND1; RGS8; LONRF2; GPC3; INTS4; BMP2K; CCDC74B; LETM2; NEU3; NOVA1; BBS1; PCDH20; MUS81; SLC4A8; FAM168A; SF3B2; MGAT4A; RGS21; FIBP; ITGB8; ZNF703; ANKRD13D; TCEAL1; TMTC2; NR2E3; CABP4; PON1; RSF1; GDPD5; FCHSD2; RELT; TNRC18; ZDHHC11; EGLN2; ADARB2; …
Tonsils	57	7274	40.4255	1.01697	0.467061	1	1	1	TEX14; PAK1; AFP; SLC22A17; FGFR3; RAB6A; MYO7A; KAT6A; GP2; ATP2A3; KIF12; CCND1; GPC3; BMP2K; RAB1B; LETM2; NOVA1; MGAT4A; FIBP; ITGB8; TMEM26; HMGCLL1; TMTC2; BARHL1; PON1; RSF1; EGLN2; ADARB2; UPP2; NUMA1; ARRB1; ANK1; LRRN1; ARHGEF17; SEMA3F; IGFBP5; NHS; ITPR2; GATA3; ARAP1; DRAP1; ALB; F3; B4GAT1; RHOD; PTPRT; KRBA2; CCS; SORCS1; FAM110B; RAD9A; ULK2; CHTOP; ARMT1; CHST10; WNK3; SART1;
Jurkat A3	26	4200	18.4397	0.803564	0.919103	1	1	1	PAK1; KLC2; INTS4; SLC4A8; MGAT4A; FIBP; RSF1; FCHSD2; CFL1; NUMA1; RNF169; CTSF; NHS; DRAP1; ALB; FAM169A; F3; RBM4B; EIF1AD; AP5B1; TLE3; RAD9A; GOLGA7; ARMT1; RBM4; SART1;
Rectum	58	7113	41.1348	1.05823	0.318971	1	1	1	TEX14; PAK1; AFP; SLC22A17; FGFR3; RAB6A; MYO7A; KAT6A; GP2; ATP2A3; KIF12; GPC3; BMP2K; RAB1B; LETM2; NOVA1; MGAT4A; FIBP; ITGB8; TMEM26; ZNF703; HMGCLL1; TMTC2; BARHL1; PON1; RSF1; EGLN2; ADARB2; UPP2; COL2A1; NUMA1; ARRB1; ANK1; LRRN1; SEMA3F; IGFBP5; NHS; ITPR2; GATA3; ARAP1; DRAP1; ALB; F3; B4GAT1; RHOD; PTPRT; KRBA2; CCS; SORCS1; FAM110B; RAD9A; ULK2; CHTOP; PHLDB2; ARMT1; CHST10; WNK3; SAR…
Liver	94	11680	66.6667	1.04439	0.271209	1	1	1	TEX14; PAK1; AFP; SLC22A17; CYP4A22; GDPD4; FGFR3; RAB6A; MYO7A; KAT6A; GP2; ATP2A3; ADRA1B; KIF12; CCND1; LONRF2; GPC3; BMP2K; RAB1B; DENND1B; NOVA1; BBS1; SLC4A8; FAM168A; SF3B2; MGAT4A; RGS21; FIBP; TMEM26; ZNF703; ANKRD13D; TCEAL1; HMGCLL1; TMTC2; BARHL1; NAGS; PON1; RSF1; FCHSD2; TNRC18; CFL1; EGLN2; ADARB2; UPP2; COL2A1; NUMA1; ARRB1; RNF169; ANK1; PELI3; LRRN1; ARHGEF17; CDYL2; ATG16L2; SE…
CNS	2	74	1.41844	3.524	0.111382	1	1	1	GATA3; PTPRT;
CD4	10	1901	7.0922	0.68325	0.929801	1	1	1	RAB6A; ATP2A3; RAB1B; SF3B2; PON1; CFL1; NUMA1; ALB; EIF1AD; RBM4;
Skeletal muscles	68	9060	48.227	0.974034	0.652297	1	1	1	PAK1; AFP; RAB6A; MYO7A; KAT6A; ATP2A3; CNTN3; KIF12; GPC3; BMP2K; RAB1B; SLC4A8; FAM168A; MGAT4A; RGS21; FIBP; ITGB8; ZNF703; TCEAL1; HMGCLL1; TMTC2; BARHL1; PON1; RSF1; FCHSD2; TNRC18; CFL1; EGLN2; ADARB2; UPP2; NUMA1; ARRB1; RNF169; TPPP; ANK1; PELI3; LRRN1; ARHGEF17; ATG16L2; RAI2; KDM4B; CTSF; NHS; FFAR1; ITPR2; ARAP1; DRAP1; ALB; B4GAT1; RHOD; KRBA2; ZNF281; JADE2; CCS; SORCS1; FAM110B; TP5…
H293	43	6792	30.4965	0.821677	0.959007	1	1	1	PAK1; AFP; RAB6A; KAT6A; KLC2; LONRF2; GPC3; INTS4; BMP2K; RAB1B; MUS81; SF3B2; ZNF703; TCEAL1; PON1; RSF1; FCHSD2; CFL1; COL2A1; NUMA1; ARRB1; GLCE; ANK1; MCC; IGFBP5; CTSF; ITPR2; ARAP1; DRAP1; ALB; FAM169A; RBM4B; B4GAT1; EIF1AD; STXBP5; ZNF281; TLE3; CCS; RAD9A; CHTOP; ARMT1; RBM4; SART1;
Prostate	63	7923	44.6809	1.03193	0.401386	1	1	1	TEX14; PAK1; AFP; SLC22A17; FGFR3; RAB6A; MYO7A; KAT6A; GP2; ATP2A3; KIF12; GPC3; BMP2K; RAB1B; LETM2; NOVA1; FAM168A; MGAT4A; RGS21; FIBP; ITGB8; TMEM26; TCEAL1; HMGCLL1; TMTC2; BARHL1; PON1; RSF1; EGLN2; ADARB2; NUMA1; ARRB1; PELI3; ARHGEF17; CDYL2; SEMA3F; IGFBP5; CTSF; NHS; ADAM28; FFAR1; ITPR2; GATA3; ARAP1; DRAP1; ALB; F3; B4GAT1; DOK6; XRRA1; PTPRT; KRBA2; JADE2; CCS; FAM110B; RAD9A; TP53T…
Jurkat	22	2869	15.6028	0.995447	0.546013	1	1	1	AQP11; RAB6A; ATP2A3; KLC2; BMP2K; RAB1B; SF3B2; FIBP; TMEM26; CFL1; COL2A1; NUMA1; IGFBP5; ITPR2; ALB; F3; RBM4B; B4GAT1; GOLGA7; ARMT1; WNK3; SART1;
Bone marrow	60	7808	42.5532	0.997272	0.543938	1	1	1	TEX14; PAK1; AFP; SLC22A17; FGFR3; RAB6A; MYO7A; GP2; ATP2A3; KLC2; CNTN3; KIF12; CCND1; GPC3; BMP2K; RAB1B; NOVA1; SF3B2; MGAT4A; FIBP; ITGB8; HMGCLL1; TMTC2; BARHL1; PON1; RSF1; CFL1; EGLN2; ADARB2; UPP2; NUMA1; ARRB1; ANK1; LRRN1; ARHGEF17; IGFBP5; NHS; FFAR1; ITPR2; GATA3; ARAP1; DRAP1; ALB; F3; RBM4B; B4GAT1; RHOD; PTPRT; TLE3; CCS; SORCS1; FAM110B; RAD9A; ULK2; CHTOP; PHLDB2; ARMT1; CHST10;…
Lateral ventricle	50	6620	35.461	0.980231	0.602154	1	1	1	TEX14; PAK1; AFP; RAB6A; MYO7A; KAT6A; GP2; ATP2A3; KIF12; CCND1; GPC3; BMP2K; RAB1B; NOVA1; MGAT4A; FIBP; ITGB8; ZNF703; HMGCLL1; TMTC2; BARHL1; PON1; RSF1; EGLN2; ADARB2; UPP2; NUMA1; ARRB1; LRRN1; ARHGEF17; SEMA3F; IGFBP5; CTSF; NHS; ITPR2; GATA3; ARAP1; DRAP1; B4GAT1; RHOD; PTPRT; SORCS1; FAM110B; RAD9A; ULK2; CHTOP; ARMT1; CHST10; MOV10L1; SART1;
Colorectal cancer	62	7513	43.9716	1.07097	0.266919	1	1	1	TEX14; PAK1; AFP; SLC22A17; FGFR3; RAB6A; MYO7A; KAT6A; GP2; ATP2A3; CNTN3; KIF12; CCND1; GPC3; BMP2K; RAB1B; LETM2; NOVA1; MGAT4A; FIBP; ITGB8; TMEM26; ZNF703; HMGCLL1; TMTC2; BARHL1; PON1; RSF1; EGLN2; ADARB2; UPP2; NUMA1; ARRB1; ANK1; LRRN1; ARHGEF17; SEMA3F; IGFBP5; CTSF; NHS; ITPR2; GATA3; ARAP1; DRAP1; ALB; F3; B4GAT1; RHOD; PTPRT; KRBA2; CCS; SORCS1; FAM110B; RAD9A; ULK2; CHTOP; PHLDB2; AR…
Gall bladder	58	7295	41.1348	1.03183	0.410233	1	1	1	TEX14; PAK1; AFP; SLC22A17; RAB6A; MYO7A; KAT6A; GP2; ATP2A3; KIF12; CCND1; GPC3; BMP2K; RAB1B; LETM2; NOVA1; MGAT4A; FIBP; ITGB8; TMEM26; ZNF703; HMGCLL1; TMTC2; BARHL1; PON1; RSF1; EGLN2; ADARB2; UPP2; NUMA1; ARRB1; ANK1; LRRN1; ARHGEF17; RAI2; IGFBP5; CTSF; NHS; ITPR2; GATA3; ARAP1; DRAP1; F3; B4GAT1; RHOD; PTPRT; KRBA2; JADE2; CCS; SORCS1; FAM110B; RAD9A; ULK2; CHTOP; ARMT1; CHST10; WNK3; SAR…
Plasma	96	11971	68.0851	1.04068	0.283895	1	1	1	TEX14; PAK1; AFP; GDPD4; FGFR3; RAB6A; MYO7A; ESRRB; CYP4X1; KAT6A; GP2; ATP2A3; ADRA1B; OR2G6; CCDC170; KLC2; AFF3; CNTN3; GPC3; INTS4; BMP2K; CCDC74B; RAB1B; OR2T34; NOVA1; PCDH20; MUS81; SLC4A8; SF3B2; MGAT4A; ITGB8; ZNF703; BARHL1; NR2E3; NAGS; PON1; RSF1; GDPD5; FCHSD2; TNRC18; CFL1; ZDHHC11; EGLN2; COL2A1; NUMA1; ARRB1; GLCE; RNF169; TPPP; ANK1; PELI3; MCC; LRRN1; RANBP3L; ARHGEF17; CDYL2; …
Malignant carcinoid	54	7081	38.2979	0.989713	0.571005	1	1	1	TEX14; PAK1; AFP; SLC22A17; FGFR3; RAB6A; KAT6A; GP2; ATP2A3; CNTN3; KIF12; CCND1; GPC3; BMP2K; RAB1B; LETM2; NOVA1; MGAT4A; FIBP; TMEM26; ZNF703; HMGCLL1; TMTC2; BARHL1; PON1; RSF1; EGLN2; ADARB2; NUMA1; ARRB1; ANK1; LRRN1; IGFBP5; CTSF; NHS; ITPR2; GATA3; ARAP1; DRAP1; ALB; F3; B4GAT1; RHOD; PTPRT; JADE2; CCS; FAM110B; RAD9A; ULK2; CHTOP; ARMT1; CHST10; MOV10L1; SART1;
Ascites cancer cell	21	3509	14.8936	0.776912	0.92358	1	1	1	RAB6A; MYO7A; ATP2A3; BMP2K; RAB1B; SF3B2; ITGB8; RSF1; RELT; CFL1; COL2A1; NUMA1; ARRB1; IGFBP5; CTSF; ALB; RBM4B; RAD9A; CHTOP; RBM4; SART1;
Endometrial cancer	63	7460	44.6809	1.09597	0.193938	1	1	1	TEX14; PAK1; AFP; SLC22A17; FGFR3; RAB6A; MYO7A; KAT6A; GP2; ATP2A3; CNTN3; KIF12; CCND1; GPC3; BMP2K; RAB1B; LETM2; NOVA1; MGAT4A; FIBP; ITGB8; TMEM26; ZNF703; HMGCLL1; TMTC2; BARHL1; PON1; RSF1; EGLN2; ADARB2; UPP2; NUMA1; ARRB1; ANK1; LRRN1; ARHGEF17; SEMA3F; IGFBP5; CTSF; NHS; ITPR2; GATA3; ARAP1; DRAP1; ALB; F3; B4GAT1; RHOD; PTPRT; KRBA2; JADE2; CCS; SORCS1; FAM110B; RAD9A; ULK2; CHTOP; ARM…
Lung cancer	60	7435	42.5532	1.0473	0.350558	1	1	1	TEX14; PAK1; AFP; SLC22A17; FGFR3; RAB6A; MYO7A; KAT6A; GP2; ATP2A3; KIF12; CCND1; GPC3; BMP2K; RAB1B; LETM2; NOVA1; MGAT4A; FIBP; ITGB8; TMEM26; ZNF703; HMGCLL1; TMTC2; BARHL1; PON1; RSF1; EGLN2; ADARB2; UPP2; NUMA1; ARRB1; LRRN1; ARHGEF17; SEMA3F; IGFBP5; CTSF; NHS; ITPR2; GATA3; ARAP1; DRAP1; ALB; F3; B4GAT1; RHOD; PTPRT; KRBA2; CCS; SORCS1; FAM110B; RAD9A; ULK2; CHTOP; PHLDB2; ARMT1; CHST10; …
HCT116	21	2651	14.8936	1.02836	0.481983	1	1	1	PAK1; FGFR3; RAB6A; ATP2A3; KLC2; INTS4; RAB1B; SF3B2; NAGS; RSF1; CFL1; NUMA1; ITPR2; DRAP1; ALB; RBM4B; XRRA1; FAM110B; ARMT1; RBM4; SART1;
PC3	11	1294	7.80142	1.10403	0.413194	1	1	1	RAB6A; RAB1B; RELT; CFL1; EGLN2; COL2A1; SEMA3F; IGFBP5; CTSF; B4GAT1; PHLDB2;
MicroProt	4	440	2.83688	1.18253	0.440964	1	1	1	PON1; CFL1; IGFBP5; ALB;
Epididymis	56	7090	39.7163	1.02506	0.438023	1	1	1	TEX14; PAK1; AFP; SLC22A17; FGFR3; RAB6A; KAT6A; GP2; ATP2A3; CNTN3; KIF12; CCND1; GPC3; BMP2K; RAB1B; LETM2; NOVA1; FIBP; ITGB8; TMEM26; ZNF703; HMGCLL1; TMTC2; BARHL1; PON1; RSF1; EGLN2; ADARB2; UPP2; NUMA1; ANK1; LRRN1; ARHGEF17; IGFBP5; CTSF; ITPR2; GATA3; ARAP1; DRAP1; ALB; F3; B4GAT1; RHOD; PTPRT; KRBA2; JADE2; CCS; SORCS1; FAM110B; RAD9A; ULK2; CHTOP; ARMT1; CHST10; ADGRG2; SART1;
Cerebellum	61	7633	43.2624	1.03714	0.385163	1	1	1	TEX14; PAK1; AFP; SLC22A17; FGFR3; KAT6A; GP2; ATP2A3; CNTN3; KIF12; GPC3; BMP2K; RAB1B; NOVA1; MUS81; MGAT4A; FIBP; ITGB8; ZNF703; HMGCLL1; TMTC2; BARHL1; PON1; RSF1; TNRC18; EGLN2; ADARB2; NUMA1; ARRB1; RNF169; ANK1; LRRN1; ARHGEF17; SEMA3F; IGFBP5; CTSF; NHS; FFAR1; ITPR2; GATA3; ARAP1; DRAP1; ALB; F3; B4GAT1; DOK6; RHOD; PTPRT; KRBA2; JADE2; CCS; SORCS1; FAM110B; RAD9A; ULK2; CHTOP; ARMT1; CH…
Nasopharynx	55	6904	39.0071	1.03388	0.408004	1	1	1	TEX14; PAK1; AFP; SLC22A17; FGFR3; RAB6A; MYO7A; KAT6A; GP2; ATP2A3; CNTN3; KIF12; CCND1; GPC3; BMP2K; RAB1B; LETM2; NOVA1; MGAT4A; FIBP; ITGB8; TMEM26; ZNF703; HMGCLL1; TMTC2; BARHL1; RSF1; ADARB2; UPP2; NUMA1; ARRB1; LRRN1; ARHGEF17; SEMA3F; IGFBP5; NHS; ITPR2; GATA3; ARAP1; DRAP1; ALB; F3; B4GAT1; RHOD; PTPRT; KRBA2; CCS; SORCS1; FAM110B; RAD9A; ULK2; CHTOP; ARMT1; CHST10; SART1;
global_SCX_fractionated	10	2476	7.0922	0.52458	0.994637	1	1	1	KLC2; RAB1B; SF3B2; CFL1; NUMA1; ARAP1; RHOD; CHTOP; ARMT1; RBM4;
Hippocampus	60	7355	42.5532	1.05869	0.311905	1	1	1	PAK1; AFP; SLC22A17; FGFR3; RAB6A; MYO7A; KAT6A; GP2; ATP2A3; CNTN3; KIF12; CCND1; GPC3; BMP2K; RAB1B; NOVA1; MGAT4A; FIBP; ITGB8; HMGCLL1; TMTC2; BARHL1; PON1; RSF1; TNRC18; EGLN2; ADARB2; NUMA1; ARRB1; RNF169; ANK1; LRRN1; ARHGEF17; SEMA3F; IGFBP5; CTSF; NHS; ADAM28; FFAR1; ITPR2; GATA3; ARAP1; DRAP1; ALB; B4GAT1; RHOD; PTPRT; SORCS1; FAM110B; RAD9A; ARNTL; ULK2; CHTOP; ARMT1; CHST10; MOV10L1; …
HeLa	50	5789	35.461	1.12094	0.186453	1	1	1	TEX14; PAK1; FGFR3; RAB6A; GP2; OR2G6; CCDC170; KLC2; AFF3; RGS8; INTS4; BMP2K; RAB1B; PCDH20; SF3B2; FOXD4L4; FIBP; HMGCLL1; TRIM6-TRIM34; GDPD5; FCHSD2; TNRC18; CFL1; NUMA1; ANK1; LRRN1; ARHGEF17; CDYL2; SEMA3F; KDM4B; IGFBP5; ARAP1; DRAP1; ALB; RBM4B; PTPRT; DLGAP1; ZNF281; TLE3; CCS; FAM110B; ULK2; CHTOP; GOLGA7; PHLDB2; ARMT1; MOV10L1; RBM4; ADGRG2; SART1;
Malignant lymphoma	54	6586	38.2979	1.0641	0.312119	1	1	1	TEX14; PAK1; AFP; SLC22A17; RAB6A; MYO7A; KAT6A; GP2; ATP2A3; CNTN3; KIF12; CCND1; GPC3; BMP2K; RAB1B; LETM2; NOVA1; FIBP; ITGB8; TMEM26; ZNF703; HMGCLL1; TMTC2; BARHL1; PON1; RSF1; EGLN2; ADARB2; UPP2; NUMA1; ARRB1; LRRN1; ARHGEF17; IGFBP5; CTSF; NHS; ITPR2; GATA3; ARAP1; DRAP1; ALB; F3; B4GAT1; RHOD; PTPRT; CCS; SORCS1; FAM110B; RAD9A; ULK2; CHTOP; ARMT1; CHST10; SART1;
Prostate cancer	59	7214	41.844	1.0614	0.30598	1	1	1	TEX14; PAK1; AFP; SLC22A17; FGFR3; RAB6A; MYO7A; KAT6A; GP2; ATP2A3; CNTN3; KIF12; CCND1; GPC3; BMP2K; RAB1B; LETM2; NOVA1; MGAT4A; FIBP; ITGB8; TMEM26; ZNF703; HMGCLL1; TMTC2; BARHL1; PON1; RSF1; EGLN2; ADARB2; NUMA1; ARRB1; ANK1; LRRN1; ARHGEF17; IGFBP5; CTSF; NHS; ITPR2; GATA3; ARAP1; DRAP1; ALB; F3; B4GAT1; RHOD; PTPRT; KRBA2; JADE2; CCS; SORCS1; FAM110B; RAD9A; ULK2; CHTOP; ARMT1; CHST10; WN…
Skin	59	7292	41.844	1.05005	0.343498	1	1	1	TEX14; PAK1; AFP; FGFR3; RAB6A; MYO7A; KAT6A; GP2; ATP2A3; KIF12; CCND1; GPC3; BMP2K; RAB1B; LETM2; FIBP; ITGB8; TMEM26; ZNF703; HMGCLL1; TMTC2; BARHL1; PON1; RSF1; CFL1; EGLN2; ADARB2; UPP2; COL2A1; NUMA1; TPPP; ARHGEF17; SEMA3F; IGFBP5; CTSF; NHS; ITPR2; GATA3; ARAP1; DRAP1; ALB; F3; B4GAT1; RHOD; PTPRT; KRBA2; TLE3; JADE2; CCS; SORCS1; FAM110B; RAD9A; CHTOP; PHLDB2; ARMT1; CHST10; MOV10L1; SAR…
Placenta	88	10894	62.4113	1.04827	0.271708	1	1	1	TEX14; PAK1; AFP; SLC22A17; FGFR3; RAB6A; MYO7A; KAT6A; GP2; ATP2A3; KLC2; AFF3; CNTN3; KIF12; CCND1; GPC3; INTS4; BMP2K; RAB1B; LETM2; NEU3; NOVA1; BBS1; FAM168A; SF3B2; MGAT4A; RGS21; FIBP; ITGB8; TMEM26; ZNF703; TCEAL1; HMGCLL1; TMTC2; BARHL1; PON1; RSF1; GDPD5; CFL1; EGLN2; ADARB2; UPP2; NUMA1; ARRB1; GLCE; ANK1; PELI3; LRRN1; ARHGEF17; CDYL2; RAI2; SEMA3F; IGFBP5; CTSF; NHS; FFAR1; ITPR2; GA…
Lung	83	9992	58.8652	1.07797	0.175279	1	1	1	TEX14; PAK1; AFP; SLC22A17; RAB6A; KAT6A; GP2; ATP2A3; ADRA1B; COL28A1; AFF3; KIF12; GPC3; BMP2K; RAB1B; LETM2; NEU3; NOVA1; BBS1; FAM168A; MGAT4A; FOXD4L4; RGS21; FIBP; ITGB8; TMEM26; ZNF703; TCEAL1; HMGCLL1; TMTC2; BARHL1; PON1; RSF1; FCHSD2; TNRC18; EGLN2; ADARB2; UPP2; COL2A1; NUMA1; ARRB1; DPY19L2; RNF169; ANK1; PELI3; LRRN1; ARHGEF17; ATG16L2; RAI2; SEMA3F; KDM4B; IGFBP5; CTSF; NHS; ADAM28;…
Cerebral cortex	54	7099	38.2979	0.987203	0.580439	1	1	1	TEX14; PAK1; AFP; SLC22A17; FGFR3; RAB6A; KAT6A; GP2; ATP2A3; CNTN3; KIF12; GPC3; BMP2K; RAB1B; NOVA1; MGAT4A; FIBP; ITGB8; ZNF703; HMGCLL1; TMTC2; BARHL1; PON1; RSF1; EGLN2; ADARB2; UPP2; NUMA1; ARRB1; ANK1; LRRN1; ARHGEF17; SEMA3F; CTSF; NHS; ITPR2; GATA3; ARAP1; DRAP1; F3; B4GAT1; RHOD; PTPRT; JADE2; CCS; SORCS1; FAM110B; RAD9A; ULK2; CHTOP; ARMT1; CHST10; MOV10L1; SART1;
Ovarian cancer	63	7644	44.6809	1.06959	0.268049	1	1	1	TEX14; PAK1; AFP; SLC22A17; FGFR3; RAB6A; MYO7A; KAT6A; GP2; ATP2A3; CNTN3; KIF12; CCND1; GPC3; BMP2K; RAB1B; LETM2; NOVA1; MGAT4A; FIBP; ITGB8; TMEM26; ZNF703; HMGCLL1; TMTC2; BARHL1; PON1; RSF1; EGLN2; ADARB2; UPP2; NUMA1; ARRB1; ANK1; LRRN1; ARHGEF17; SEMA3F; IGFBP5; CTSF; NHS; ITPR2; GATA3; ARAP1; DRAP1; ALB; F3; B4GAT1; RHOD; PTPRT; KRBA2; JADE2; CCS; SORCS1; FAM110B; RAD9A; ULK2; CHTOP; PHL…
Kidney	90	10256	63.8298	1.13879	0.0365252	1	1	1	TEX14; PAK1; AFP; SLC22A17; CYP4A22; FGFR3; RAB6A; MYO7A; KAT6A; GP2; ATP2A3; ADRA1B; CNTN3; KIF12; CCND1; GPC3; BMP2K; RAB1B; LETM2; NEU3; NOVA1; BBS1; SLC4A8; FAM168A; MGAT4A; FOXD4L4; RGS21; FIBP; ITGB8; TMEM26; ZNF703; TCEAL1; HMGCLL1; TMTC2; BARHL1; NAGS; PON1; RSF1; FCHSD2; TNRC18; EGLN2; ADARB2; UPP2; COL2A1; NUMA1; ARRB1; RNF169; ANK1; PELI3; LRRN1; ARHGEF17; ATG16L2; RAI2; SEMA3F; KDM4B;…
H1688	7	1007	4.96454	0.903263	0.663797	1	1	1	SF3B2; MGAT4A; CFL1; NUMA1; B4GAT1; RBM4; SART1;
Sy5y	19	2490	13.4752	0.990629	0.555937	1	1	1	PAK1; KLC2; RAB1B; MUS81; SF3B2; CFL1; COL2A1; NUMA1; ARRB1; HAL; DRAP1; ALB; B4GAT1; TLE3; SORCS1; GOLGA7; SH3BP5L; RBM4; SART1;
Duodenum	61	7275	43.2624	1.08817	0.221008	1	1	1	TEX14; PAK1; AFP; SLC22A17; FGFR3; RAB6A; MYO7A; KAT6A; GP2; ATP2A3; KIF12; CCND1; GPC3; BMP2K; RAB1B; LETM2; NOVA1; MGAT4A; FIBP; ITGB8; TMEM26; ZNF703; HMGCLL1; TMTC2; BARHL1; PON1; RSF1; EGLN2; ADARB2; UPP2; COL2A1; NUMA1; ARRB1; LRRN1; ARHGEF17; SEMA3F; IGFBP5; CTSF; NHS; ITPR2; GATA3; ARAP1; DRAP1; ALB; F3; B4GAT1; RHOD; PTPRT; KRBA2; JADE2; CCS; SORCS1; FAM110B; RAD9A; ULK2; CHTOP; PHLDB2; …
Bronchus	55	6923	39.0071	1.03104	0.417979	1	1	1	TEX14; PAK1; AFP; SLC22A17; RAB6A; MYO7A; KAT6A; GP2; ATP2A3; CNTN3; KIF12; CCND1; GPC3; BMP2K; RAB1B; LETM2; NOVA1; MGAT4A; FIBP; ITGB8; TMEM26; HMGCLL1; TMTC2; BARHL1; PON1; RSF1; EGLN2; ADARB2; UPP2; NUMA1; ARRB1; ANK1; LRRN1; ARHGEF17; SEMA3F; IGFBP5; NHS; ITPR2; GATA3; ARAP1; DRAP1; F3; B4GAT1; RHOD; PTPRT; KRBA2; CCS; SORCS1; FAM110B; RAD9A; ULK2; CHTOP; ARMT1; CHST10; SART1;
Brain	66	7290	46.8085	1.17493	0.0545472	1	1	1	PAK1; FGFR3; RAB6A; MYO7A; CYP4X1; ATP2A3; KLC2; AFF3; CNTN3; RGS8; GPC3; BMP2K; RAB1B; NEU3; NOVA1; BBS1; FAM168A; MGAT4A; FOXD4L4; RGS21; FIBP; TCEAL1; RSF1; FCHSD2; TNRC18; CFL1; ADARB2; NUMA1; ARRB1; GLCE; RNF169; TPPP; ANK1; PELI3; LRRN1; ARHGEF17; ATG16L2; RAI2; SEMA3F; KDM4B; CTSF; NHS; ADAM28; FFAR1; ARAP1; ALB; F3; B4GAT1; DOK6; PTPRT; STXBP5; ZNF281; JADE2; CCS; SORCS1; RAD9A; TP53TG5; …
Stomach	64	8044	45.3901	1.03254	0.397252	1	1	1	TEX14; PAK1; AFP; SLC22A17; RAB6A; MYO7A; KAT6A; GP2; ATP2A3; CNTN3; KIF12; CCND1; GPC3; BMP2K; RAB1B; LETM2; NOVA1; MGAT4A; FIBP; ITGB8; TMEM26; ZNF703; HMGCLL1; TMTC2; BARHL1; PON1; RSF1; EGLN2; ADARB2; UPP2; COL2A1; NUMA1; ARRB1; ANK1; PELI3; LRRN1; ARHGEF17; SEMA3F; IGFBP5; CTSF; NHS; ADAM28; FFAR1; ITPR2; GATA3; ARAP1; DRAP1; ALB; F3; B4GAT1; RHOD; PTPRT; KRBA2; CCS; SORCS1; FAM110B; RAD9A; …
Pancreas	80	9936	56.7376	1.04487	0.310138	1	1	1	TEX14; PAK1; AFP; SLC22A17; FGFR3; RAB6A; MYO7A; KAT6A; GP2; ATP2A3; KIF12; CCND1; GPC3; BMP2K; RAB1B; LETM2; BBS1; FAM168A; SF3B2; MGAT4A; FOXD4L4; RGS21; FIBP; ITGB8; TMEM26; ZNF703; TCEAL1; HMGCLL1; TMTC2; BARHL1; PON1; RSF1; FCHSD2; TNRC18; CFL1; EGLN2; ADARB2; UPP2; NUMA1; ARRB1; RNF169; ANK1; LRRN1; ARHGEF17; ATG16L2; RAI2; SEMA3F; KDM4B; IGFBP5; CTSF; NHS; FFAR1; ITPR2; GATA3; ARAP1; DRAP1…
Lymph nodes	54	6700	38.2979	1.04599	0.368953	1	1	1	TEX14; PAK1; AFP; SLC22A17; FGFR3; RAB6A; MYO7A; KAT6A; GP2; ATP2A3; KIF12; GPC3; BMP2K; RAB1B; LETM2; NOVA1; MGAT4A; FIBP; TMEM26; ZNF703; HMGCLL1; TMTC2; BARHL1; PON1; RSF1; EGLN2; ADARB2; UPP2; NUMA1; ANK1; ARHGEF17; IGFBP5; NHS; ADAM28; ITPR2; GATA3; ARAP1; DRAP1; ALB; F3; B4GAT1; RHOD; PTPRT; CCS; SORCS1; FAM110B; RAD9A; ULK2; CHTOP; PHLDB2; ARMT1; CHST10; WNK3; SART1;
H358	9	1489	6.38298	0.785159	0.819815	1	1	1	AFP; SF3B2; CFL1; NUMA1; DRAP1; ALB; RBM4B; ULK2; SART1;
Fallopian tubes	55	6677	39.0071	1.06903	0.294517	1	1	1	TEX14; PAK1; AFP; SLC22A17; RAB6A; MYO7A; KAT6A; GP2; ATP2A3; CNTN3; KIF12; CCND1; GPC3; BMP2K; RAB1B; LETM2; NOVA1; MGAT4A; FIBP; ITGB8; TMEM26; ZNF703; HMGCLL1; TMTC2; BARHL1; PON1; RSF1; EGLN2; ADARB2; UPP2; NUMA1; ANK1; LRRN1; ARHGEF17; IGFBP5; CTSF; NHS; ITPR2; GATA3; ARAP1; DRAP1; F3; B4GAT1; RHOD; PTPRT; KRBA2; CCS; SORCS1; FAM110B; RAD9A; ULK2; CHTOP; ARMT1; CHST10; SART1;
Head & neck cancer	57	7062	40.4255	1.0475	0.356992	1	1	1	TEX14; PAK1; AFP; SLC22A17; FGFR3; RAB6A; MYO7A; KAT6A; GP2; ATP2A3; KIF12; CCND1; GPC3; BMP2K; RAB1B; LETM2; NOVA1; FIBP; ITGB8; TMEM26; ZNF703; HMGCLL1; TMTC2; BARHL1; PON1; RSF1; EGLN2; ADARB2; UPP2; NUMA1; ARRB1; ANK1; LRRN1; ARHGEF17; SEMA3F; IGFBP5; CTSF; NHS; GATA3; ARAP1; DRAP1; ALB; F3; B4GAT1; RHOD; PTPRT; KRBA2; JADE2; CCS; SORCS1; FAM110B; RAD9A; ULK2; CHTOP; ARMT1; CHST10; SART1;
Pancreatic cancer	65	8316	46.0993	1.01437	0.470896	1	1	1	TEX14; PAK1; AFP; SLC22A17; FGFR3; RAB6A; MYO7A; KAT6A; GP2; ATP2A3; CNTN3; KIF12; CCND1; GPC3; BMP2K; RAB1B; LETM2; NOVA1; SF3B2; MGAT4A; FIBP; ITGB8; TMEM26; ZNF703; HMGCLL1; TMTC2; BARHL1; PON1; RSF1; CFL1; EGLN2; ADARB2; UPP2; NUMA1; ARRB1; ANK1; LRRN1; ARHGEF17; SEMA3F; IGFBP5; CTSF; NHS; ITPR2; GATA3; ARAP1; DRAP1; ALB; F3; B4GAT1; RHOD; PTPRT; KRBA2; JADE2; CCS; SORCS1; FAM110B; RAD9A; ULK…
BT474	4	558	2.83688	0.932465	0.627374	1	1	1	SF3B2; CFL1; IGFBP5; ALB;
Seminal vesicle	49	6620	34.7518	0.96063	0.668507	1	1	1	TEX14; PAK1; AFP; SLC22A17; RAB6A; MYO7A; KAT6A; GP2; ATP2A3; KIF12; GPC3; BMP2K; RAB1B; LETM2; NOVA1; MGAT4A; FIBP; ITGB8; ZNF703; HMGCLL1; TMTC2; BARHL1; ADARB2; UPP2; NUMA1; ARRB1; ANK1; ARHGEF17; IGFBP5; CTSF; NHS; GATA3; ARAP1; DRAP1; ALB; F3; B4GAT1; PTPRT; KRBA2; CCS; SORCS1; FAM110B; RAD9A; ULK2; CHTOP; ARMT1; CHST10; WNK3; SART1;
Urinary bladder	59	7054	41.844	1.08547	0.235092	1	1	1	TEX14; PAK1; AFP; SLC22A17; FGFR3; RAB6A; MYO7A; GP2; ATP2A3; CNTN3; KIF12; CCND1; GPC3; BMP2K; RAB1B; LETM2; NOVA1; MGAT4A; FIBP; ITGB8; TMEM26; ZNF703; HMGCLL1; TMTC2; BARHL1; PON1; RSF1; EGLN2; ADARB2; UPP2; COL2A1; NUMA1; ARRB1; ANK1; LRRN1; ARHGEF17; SEMA3F; IGFBP5; CTSF; NHS; ITPR2; GATA3; ARAP1; DRAP1; ALB; F3; B4GAT1; RHOD; PTPRT; KRBA2; CCS; SORCS1; FAM110B; RAD9A; ULK2; CHTOP; ARMT1; CH…
K-562	18	2513	12.766	0.929929	0.668028	1	1	1	PAK1; FGFR3; ATP2A3; KLC2; BMP2K; RAB1B; SF3B2; FIBP; CFL1; NUMA1; ANK1; ADAM28; ITPR2; ARAP1; RBM4B; EIF1AD; ARMT1; SART1;
Salivary glands	55	6607	39.0071	1.08036	0.262493	1	1	1	TEX14; PAK1; AFP; SLC22A17; RAB6A; MYO7A; KAT6A; GP2; ATP2A3; KIF12; CCND1; GPC3; BMP2K; RAB1B; LETM2; NOVA1; SLC4A8; MGAT4A; FIBP; ITGB8; TMEM26; HMGCLL1; TMTC2; BARHL1; PON1; RSF1; EGLN2; ADARB2; UPP2; NUMA1; ARRB1; ANK1; LRRN1; SEMA3F; IGFBP5; CTSF; NHS; ADAM28; ITPR2; GATA3; ARAP1; DRAP1; ALB; B4GAT1; RHOD; PTPRT; KRBA2; CCS; FAM110B; RAD9A; ULK2; CHTOP; ARMT1; CHST10; WNK3;
Testis	85	10269	60.2837	1.07417	0.180517	1	1	1	TEX14; PAK1; AFP; SLC22A17; FGFR3; RAB6A; MYO7A; ESRRB; KAT6A; GP2; ATP2A3; KLC2; CNTN3; KIF12; CCND1; RGS8; GPC3; BMP2K; RAB1B; LETM2; NEU3; NOVA1; BBS1; FAM168A; MGAT4A; RGS21; FIBP; ITGB8; TMEM26; TCEAL1; HMGCLL1; TMTC2; BARHL1; PON1; RSF1; FCHSD2; TNRC18; CFL1; EGLN2; ADARB2; UPP2; NUMA1; ARRB1; DPY19L2; RNF169; ANK1; PELI3; LRRN1; ARHGEF17; CDYL2; ATG16L2; SEMA3F; KDM4B; IGFBP5; CTSF; NHS; A…
MDA231	1	336	0.70922	0.390031	0.927451	1	1	1	CFL1;
Urothelial cancer	61	7521	43.2624	1.05258	0.329749	1	1	1	TEX14; PAK1; AFP; SLC22A17; FGFR3; RAB6A; MYO7A; KAT6A; GP2; ATP2A3; CNTN3; KIF12; CCND1; GPC3; BMP2K; RAB1B; LETM2; NOVA1; MGAT4A; FIBP; ITGB8; TMEM26; ZNF703; HMGCLL1; TMTC2; BARHL1; PON1; RSF1; EGLN2; ADARB2; UPP2; NUMA1; ARRB1; ANK1; LRRN1; ARHGEF17; SEMA3F; IGFBP5; CTSF; NHS; GATA3; ARAP1; DRAP1; ALB; F3; B4GAT1; RHOD; PTPRT; KRBA2; CCS; SORCS1; FAM110B; RAD9A; ULK2; CHTOP; PHLDB2; ARMT1; CH…
R	12	1948	8.51064	0.799985	0.831815	1	1	1	KLC2; RAB1B; SF3B2; RSF1; CFL1; NUMA1; ANK1; ARAP1; EIF1AD; RAD9A; ARMT1; SART1;
Soft tissue	57	6969	40.4255	1.06148	0.311467	1	1	1	TEX14; PAK1; AFP; SLC22A17; RAB6A; MYO7A; KAT6A; GP2; ATP2A3; CNTN3; KIF12; CCND1; GPC3; BMP2K; RAB1B; LETM2; NOVA1; MGAT4A; ITGB8; ZNF703; HMGCLL1; TMTC2; BARHL1; PON1; RSF1; EGLN2; ADARB2; UPP2; COL2A1; NUMA1; ARRB1; ANK1; LRRN1; ARHGEF17; SEMA3F; IGFBP5; CTSF; NHS; ITPR2; GATA3; ARAP1; DRAP1; ALB; F3; B4GAT1; RHOD; PTPRT; KRBA2; CCS; FAM110B; RAD9A; ULK2; CHTOP; ARMT1; CHST10; WNK3; SART1;
Testis cancer	55	7248	39.0071	0.984811	0.590327	1	1	1	TEX14; PAK1; AFP; SLC22A17; FGFR3; RAB6A; MYO7A; KAT6A; GP2; ATP2A3; CNTN3; KIF12; GPC3; BMP2K; RAB1B; LETM2; NOVA1; MGAT4A; FIBP; ITGB8; TMEM26; ZNF703; HMGCLL1; TMTC2; BARHL1; PON1; RSF1; EGLN2; ADARB2; NUMA1; ARRB1; ANK1; LRRN1; ARHGEF17; IGFBP5; CTSF; NHS; GATA3; ARAP1; DRAP1; ALB; F3; B4GAT1; RHOD; PTPRT; CCS; SORCS1; FAM110B; RAD9A; ULK2; CHTOP; ARMT1; CHST10; ADGRG2; SART1;
Neutrophil	9	2031	6.38298	0.575629	0.979677	1	1	1	RAB1B; SF3B2; PON1; CFL1; NUMA1; ANK1; ALB; CHTOP; RBM4;
CD8	20	3327	14.1844	0.780411	0.914268	1	1	1	AFP; RAB6A; ATP2A3; KLC2; GPC3; RAB1B; SF3B2; PON1; CFL1; NUMA1; ANK1; ITPR2; DRAP1; ALB; RBM4B; EIF1AD; CHTOP; ARMT1; RBM4; SART1;
Stomach cancer	62	7399	43.9716	1.08747	0.219436	1	1	1	TEX14; PAK1; AFP; SLC22A17; RAB6A; MYO7A; KAT6A; GP2; ATP2A3; CNTN3; KIF12; CCND1; GPC3; BMP2K; RAB1B; LETM2; NOVA1; MGAT4A; FIBP; ITGB8; TMEM26; ZNF703; HMGCLL1; TMTC2; BARHL1; PON1; RSF1; EGLN2; ADARB2; UPP2; NUMA1; ARRB1; ANK1; LRRN1; ARHGEF17; SEMA3F; IGFBP5; CTSF; NHS; ITPR2; GATA3; ARAP1; DRAP1; ALB; F3; B4GAT1; RHOD; PTPRT; KRBA2; JADE2; CCS; SORCS1; FAM110B; RAD9A; ULK2; CHTOP; ARMT1; CHS…
Skin cancer	56	7029	39.7163	1.03395	0.40599	1	1	1	TEX14; PAK1; AFP; SLC22A17; FGFR3; RAB6A; MYO7A; KAT6A; GP2; ATP2A3; CNTN3; KIF12; CCND1; GPC3; BMP2K; RAB1B; LETM2; NOVA1; ITGB8; TMEM26; ZNF703; HMGCLL1; TMTC2; BARHL1; PON1; RSF1; EGLN2; ADARB2; UPP2; NUMA1; ANK1; LRRN1; ARHGEF17; SEMA3F; IGFBP5; CTSF; NHS; GATA3; ARAP1; DRAP1; ALB; F3; B4GAT1; RHOD; PTPRT; KRBA2; JADE2; CCS; SORCS1; FAM110B; RAD9A; ULK2; CHTOP; ARMT1; CHST10; SART1;
Adrenal glands	59	7554	41.844	1.01363	0.478367	1	1	1	TEX14; PAK1; AFP; SLC22A17; FGFR3; RAB6A; MYO7A; KAT6A; GP2; ATP2A3; KIF12; CCND1; GPC3; BMP2K; RAB1B; NEU3; NOVA1; MGAT4A; FIBP; ITGB8; ZNF703; HMGCLL1; TMTC2; BARHL1; PON1; RSF1; EGLN2; ADARB2; UPP2; NUMA1; ANK1; LRRN1; ARHGEF17; SEMA3F; IGFBP5; CTSF; NHS; ADAM28; ITPR2; GATA3; ARAP1; DRAP1; ALB; F3; B4GAT1; RHOD; PTPRT; KRBA2; JADE2; CCS; SORCS1; FAM110B; RAD9A; ULK2; CHTOP; ARMT1; CHST10; MOV…
TOV112D	8	1276	5.67376	0.814533	0.775066	1	1	1	SF3B2; RSF1; CFL1; NUMA1; CTSF; ALB; B4GAT1; RBM4;
LNCaP	8	1455	5.67376	0.714326	0.881191	1	1	1	GPC3; RELT; CFL1; NUMA1; ANK1; SEMA3F; B4GAT1; ARNTL;
Corpus, uterine	55	6997	39.0071	1.02014	0.457205	1	1	1	TEX14; PAK1; AFP; SLC22A17; RAB6A; MYO7A; KAT6A; GP2; ATP2A3; CNTN3; KIF12; GPC3; BMP2K; RAB1B; LETM2; NOVA1; MGAT4A; FIBP; TMEM26; ZNF703; HMGCLL1; TMTC2; BARHL1; PON1; RSF1; EGLN2; ADARB2; UPP2; NUMA1; ANK1; LRRN1; ARHGEF17; IGFBP5; CTSF; NHS; ITPR2; GATA3; ARAP1; DRAP1; ALB; F3; B4GAT1; RHOD; PTPRT; KRBA2; CCS; SORCS1; FAM110B; RAD9A; ULK2; CHTOP; ARMT1; CHST10; WNK3; ADGRG2;
Appendix	56	7004	39.7163	1.03765	0.393008	1	1	1	TEX14; PAK1; AFP; SLC22A17; RAB6A; MYO7A; KAT6A; GP2; ATP2A3; KIF12; GPC3; BMP2K; RAB1B; LETM2; MGAT4A; FIBP; ITGB8; TMEM26; ZNF703; HMGCLL1; TMTC2; BARHL1; PON1; RSF1; EGLN2; ADARB2; UPP2; COL2A1; NUMA1; ARRB1; ANK1; LRRN1; SEMA3F; IGFBP5; NHS; ITPR2; GATA3; ARAP1; DRAP1; ALB; F3; B4GAT1; RHOD; PTPRT; KRBA2; CCS; SORCS1; FAM110B; RAD9A; ULK2; CHTOP; PHLDB2; ARMT1; CHST10; WNK3; SART1;
Erythrocytes	10	1539	7.0922	0.843962	0.75751	1	1	1	BMP2K; RAB1B; FIBP; PON1; CFL1; ANK1; DRAP1; ALB; CCS; ARMT1;
HTB75	11	1277	7.80142	1.11872	0.396147	1	1	1	PCDH20; SF3B2; RSF1; CFL1; NUMA1; IGFBP5; CTSF; ALB; B4GAT1; RBM4; SART1;
Smooth muscle cells	47	5124	33.3333	1.19045	0.0948125	1	1	1	TEX14; PAK1; AFP; RAB6A; MYO7A; KAT6A; GP2; ATP2A3; KIF12; CCND1; GPC3; BMP2K; RAB1B; MGAT4A; FIBP; ZNF703; HMGCLL1; TMTC2; BARHL1; PON1; RSF1; ADARB2; UPP2; NUMA1; ANK1; LRRN1; ARHGEF17; IGFBP5; NHS; ITPR2; GATA3; ARAP1; DRAP1; ALB; B4GAT1; RHOD; PTPRT; KRBA2; JADE2; CCS; FAM110B; RAD9A; CHTOP; ARMT1; MOV10L1; WNK3; SART1;
Gastric juice	1	243	0.70922	0.539296	0.849297	1	1	1	ALB;
Urine	26	3267	18.4397	1.03305	0.46227	1	1	1	FGFR3; RAB6A; ATP2A3; KIF12; CCND1; GPC3; RAB1B; NEU3; ITGB8; PON1; RELT; CFL1; UPP2; ARRB1; ANK1; IGFBP5; CTSF; HAL; ITPR2; ALB; B4GAT1; GLDN; RHOD; JADE2; SORCS1; GOLGA7;
Heart	49	5507	34.7518	1.15478	0.132464	1	1	1	FGFR3; ATP2A3; AFF3; CNTN3; BBS1; SLC4A8; FAM168A; MGAT4A; FOXD4L4; RGS21; FIBP; TCEAL1; PON1; RSF1; FCHSD2; TNRC18; EGLN2; COL2A1; ARRB1; RNF169; ANK1; PELI3; ARHGEF17; ATG16L2; RAI2; KDM4B; CTSF; FFAR1; ITPR2; ARAP1; F3; B4GAT1; DOK6; RHOD; ZNF281; JADE2; CCS; SORCS1; TP53TG5; ARNTL; ULK2; GOLGA7; PHLDB2; CHST10; SH3BP5L; RBM4; WNK3; SART1; ACER3;
Amygdala	11	1204	7.80142	1.18655	0.323994	1	1	1	ATP2A3; CNTN3; TNRC18; ADARB2; RNF169; LRRN1; ADAM28; FFAR1; ARNTL; CHST10; SH3BP5L;
Red blood cells	1	166	0.70922	0.789437	0.724737	1	1	1	ANK1;
Thyroid gland	60	7306	42.5532	1.06579	0.289138	1	1	1	TEX14; PAK1; AFP; SLC22A17; FGFR3; RAB6A; MYO7A; KAT6A; GP2; ATP2A3; CNTN3; KIF12; CCND1; RGS8; GPC3; BMP2K; RAB1B; LETM2; NOVA1; MGAT4A; FIBP; ITGB8; TMEM26; ZNF703; HMGCLL1; TMTC2; BARHL1; PON1; RSF1; EGLN2; ADARB2; NUMA1; ARRB1; ANK1; LRRN1; ARHGEF17; IGFBP5; NHS; ITPR2; GATA3; ARAP1; DRAP1; ALB; F3; B4GAT1; RHOD; PTPRT; KRBA2; JADE2; CCS; SORCS1; FAM110B; RAD9A; ULK2; CHTOP; ARMT1; CHST10; MO…
H460	3	736	2.12766	0.530656	0.926542	1	1	1	CFL1; GLCE; B4GAT1;
Heart muscle	49	6191	34.7518	1.0272	0.440158	1	1	1	AFP; RAB6A; MYO7A; KAT6A; GP2; ATP2A3; CNTN3; KIF12; GPC3; BMP2K; RAB1B; MGAT4A; FIBP; ITGB8; TMEM26; ZNF703; HMGCLL1; TMTC2; BARHL1; PON1; RSF1; EGLN2; ADARB2; UPP2; COL2A1; NUMA1; ANK1; LRRN1; ARHGEF17; CTSF; NHS; ITPR2; GATA3; DRAP1; ALB; B4GAT1; RHOD; PTPRT; KRBA2; SORCS1; FAM110B; RAD9A; ULK2; CHTOP; ARMT1; CHST10; MOV10L1; WNK3; SART1;
B Cell	13	2254	9.21986	0.748948	0.898921	1	1	1	AFP; GDPD4; RAB6A; ATP2A3; KLC2; RAB1B; SF3B2; CFL1; NUMA1; ANK1; ITPR2; ALB; RBM4;
Spinal cord	13	1465	9.21986	1.1523	0.339555	1	1	1	ATP2A3; MGAT4A; TNRC18; RNF169; LRRN1; ADAM28; FFAR1; GATA3; ARAP1; DOK6; CCS; CHST10; SH3BP5L;
Malignant glioma	57	7169	40.4255	1.03186	0.411771	1	1	1	TEX14; PAK1; AFP; SLC22A17; FGFR3; RAB6A; MYO7A; KAT6A; GP2; ATP2A3; CNTN3; KIF12; CCND1; GPC3; BMP2K; RAB1B; NOVA1; FIBP; ITGB8; TMEM26; HMGCLL1; TMTC2; BARHL1; PON1; RSF1; EGLN2; ADARB2; UPP2; NUMA1; ARRB1; ANK1; LRRN1; ARHGEF17; SEMA3F; IGFBP5; CTSF; NHS; ITPR2; GATA3; ARAP1; DRAP1; ALB; F3; B4GAT1; RHOD; PTPRT; CCS; SORCS1; FAM110B; RAD9A; ULK2; CHTOP; PHLDB2; ARMT1; CHST10; WNK3; SART1;
Cervical cancer	62	7426	43.9716	1.08352	0.230237	1	1	1	TEX14; PAK1; AFP; SLC22A17; FGFR3; RAB6A; MYO7A; KAT6A; GP2; ATP2A3; CNTN3; KIF12; GPC3; BMP2K; RAB1B; LETM2; NOVA1; MGAT4A; FIBP; ITGB8; TMEM26; ZNF703; HMGCLL1; TMTC2; BARHL1; PON1; RSF1; EGLN2; ADARB2; UPP2; NUMA1; ARRB1; ANK1; LRRN1; ARHGEF17; SEMA3F; IGFBP5; CTSF; NHS; ITPR2; GATA3; ARAP1; DRAP1; ALB; F3; B4GAT1; RHOD; PTPRT; KRBA2; JADE2; CCS; SORCS1; FAM110B; RAD9A; ULK2; CHTOP; PHLDB2; AR…
Malignant melanoma	61	7459	43.2624	1.06133	0.300454	1	1	1	TEX14; PAK1; AFP; SLC22A17; RAB6A; MYO7A; KAT6A; GP2; ATP2A3; CNTN3; KIF12; CCND1; GPC3; BMP2K; RAB1B; LETM2; NOVA1; FIBP; ITGB8; TMEM26; ZNF703; HMGCLL1; TMTC2; BARHL1; PON1; RSF1; EGLN2; ADARB2; UPP2; NUMA1; ARRB1; ANK1; LRRN1; ARHGEF17; SEMA3F; IGFBP5; CTSF; NHS; ITPR2; GATA3; ARAP1; DRAP1; ALB; F3; B4GAT1; RHOD; PTPRT; KRBA2; JADE2; CCS; SORCS1; FAM110B; RAD9A; ULK2; CHTOP; PHLDB2; ARMT1; CHS…
Oesophagus	5	921	3.5461	0.705836	0.843679	1	1	1	SLC22A17; FGFR3; CCND1; TCEAL1; CTSF;
Embryonal carcinoma cells	7	1232	4.96454	0.738302	0.844847	1	1	1	FGFR3; RAB6A; GPC3; RAB1B; ITPR2; ALB; RBM4;
ES2	20	3527	14.1844	0.736157	0.954486	1	1	1	KLC2; RAB1B; SF3B2; ZNF703; RSF1; RELT; CFL1; COL2A1; NUMA1; ARRB1; RNF169; DRAP1; ALB; B4GAT1; EIF1AD; CCS; CHTOP; SH3BP5L; RBM4; SART1;
Ovary	66	8592	46.8085	0.996885	0.547277	1	1	1	PAK1; AQP11; AFP; SLC22A17; RAB6A; ESRRB; KAT6A; GP2; ATP2A3; KLC2; CNTN3; KIF12; GPC3; BMP2K; RAB1B; LETM2; NOVA1; FAM168A; SF3B2; MGAT4A; RGS21; TCEAL1; HMGCLL1; TMTC2; BARHL1; PON1; RSF1; FCHSD2; TNRC18; CFL1; EGLN2; ADARB2; NUMA1; RNF169; ANK1; LRRN1; ARHGEF17; CDYL2; ATG16L2; KDM4B; IGFBP5; CTSF; NHS; ADAM28; ITPR2; GATA3; ARAP1; DRAP1; ALB; B4GAT1; RHOD; XRRA1; PTPRT; JADE2; CCS; FAM110B; R…
Liver cancer	63	7697	44.6809	1.06223	0.291693	1	1	1	TEX14; PAK1; AFP; SLC22A17; FGFR3; RAB6A; MYO7A; KAT6A; GP2; ATP2A3; CNTN3; KIF12; CCND1; GPC3; BMP2K; RAB1B; LETM2; NOVA1; MGAT4A; FIBP; ITGB8; TMEM26; ZNF703; HMGCLL1; TMTC2; BARHL1; PON1; RSF1; EGLN2; ADARB2; UPP2; NUMA1; ARRB1; ANK1; LRRN1; ARHGEF17; SEMA3F; IGFBP5; CTSF; NHS; ITPR2; GATA3; ARAP1; DRAP1; ALB; F3; B4GAT1; RHOD; PTPRT; KRBA2; JADE2; CCS; SORCS1; FAM110B; RAD9A; ULK2; CHTOP; ARM…
Dendritic cells	7	1954	4.96454	0.465502	0.994865	1	1	1	RAB6A; ATP2A3; RAB1B; CFL1; ARRB1; ARAP1; ARMT1;
OVCAR3	26	3714	18.4397	0.908715	0.740195	1	1	1	PAK1; RAB6A; KLC2; CNTN3; INTS4; RAB1B; FAM168A; SF3B2; ITGB8; RSF1; RELT; CFL1; COL2A1; NUMA1; TPPP; DRAP1; ALB; F3; B4GAT1; EIF1AD; CCS; CHTOP; ARMT1; SH3BP5L; RBM4; SART1;
Huh7	24	2976	17.0213	1.04686	0.438536	1	1	1	PAK1; AQP11; AFP; GDPD4; KAT6A; ATP2A3; CCDC170; KLC2; GPC3; MUS81; TMTC2; NAGS; CFL1; NUMA1; ANK1; MCC; CDYL2; ITPR2; ALB; RBM4B; TLE3; SORCS1; RBM4; SART1;
Serum	60	7685	42.5532	1.01323	0.479229	1	1	1	TEX14; RAB6A; MYO7A; KAT6A; GP2; ATP2A3; ADRA1B; COL28A1; CCDC170; KLC2; AFF3; CNTN3; RGS8; BMP2K; RAB1B; MUS81; SLC4A8; SF3B2; ZNF703; PON1; RSF1; RELT; TNRC18; CFL1; ZDHHC11; COL2A1; NUMA1; ARRB1; DPY19L2; TPPP; ANK1; ATG16L2; KDM4B; IGFBP5; CTSF; HAL; ITPR2; GATA3; ARAP1; DRAP1; ALB; FAM169A; RNF128; THAP1; B4GAT1; EIF1AD; STXBP5; KRBA2; JADE2; CCS; RAD9A; ARNTL; ULK2; NKX2-8; PHLDB2; ARMT1; M…
Lens	5	1037	3.5461	0.626881	0.907301	1	1	1	BMP2K; CFL1; NHS; ALB; TLE3;
Breast	54	6413	38.2979	1.0928	0.233623	1	1	1	TEX14; PAK1; AFP; RAB6A; MYO7A; KAT6A; GP2; ATP2A3; KIF12; GPC3; BMP2K; RAB1B; NOVA1; MGAT4A; FIBP; ITGB8; TMEM26; ZNF703; HMGCLL1; TMTC2; BARHL1; PON1; RSF1; EGLN2; ADARB2; UPP2; NUMA1; ARRB1; LRRN1; ARHGEF17; SEMA3F; IGFBP5; CTSF; NHS; ITPR2; GATA3; ARAP1; DRAP1; ALB; F3; B4GAT1; RHOD; PTPRT; KRBA2; CCS; SORCS1; FAM110B; RAD9A; ULK2; CHTOP; ARMT1; CHST10; WNK3; SART1;
Hair	4	817	2.83688	0.636865	0.879981	1	1	1	CFL1; ALB; RBM4; SART1;
H520	7	843	4.96454	1.07899	0.475014	1	1	1	PAK1; SF3B2; CFL1; IGFBP5; ALB; B4GAT1; EIF1AD;
Nipple aspirate fluid	4	754	2.83688	0.690077	0.837868	1	1	1	GP2; PON1; CFL1; ALB;
Uterus	10	917	7.0922	1.41641	0.17032	1	1	1	FGFR3; ATP2A3; CCND1; NUMA1; PELI3; RAI2; IGFBP5; ADAM28; DOK6; SART1;
Tracheobronchial cells	1	47	0.70922	2.7878	0.305146	1	1	1	CFL1;
T24	2	123	1.41844	2.12024	0.244917	1	1	1	AFP; CFL1;
CPE_SCX_fractionated	8	2331	5.67376	0.445881	0.998248	1	1	1	KLC2; RAB1B; ITGB8; CFL1; NUMA1; ARAP1; ALB; RBM4;
CRC	27	4247	19.1489	0.825223	0.895912	1	1	1	PAK1; AFP; FGFR3; RAB6A; GP2; GPC3; RAB1B; SF3B2; TMTC2; RSF1; FCHSD2; RELT; CFL1; COL2A1; NUMA1; TPPP; ATG16L2; SEMA3F; IGFBP5; DRAP1; ALB; RBM4B; B4GAT1; CHTOP; ARMT1; RBM4; SART1;
Preadipocytes	6	510	4.25532	1.52907	0.201046	1	1	1	AFP; CFL1; COL2A1; IGFBP5; ALB; F3;
Fetal hepatocytes	44	3784	31.2057	1.50914	0.00208443	1	1	1	AQP11; AFP; SLC22A17; MYO7A; ESRRB; KAT6A; ATP2A3; ADRA1B; OR2G6; KLC2; AFF3; KIF12; BMP2K; SLC4A8; FIBP; ZNF703; BARHL1; NR2E3; TNRC18; CFL1; ZDHHC11; EGLN2; ADARB2; UPP2; NUMA1; ARRB1; DPY19L2; MCC; ARHGEF17; SEMA3F; ADAM28; FFAR1; ST6GALNAC5; ITPR2; ALB; RNF128; B4GAT1; DLGAP1; JADE2; PHLDB2; SH3BP5L; RBM4; WNK3; SART1;
Amniotic fluid	5	566	3.5461	1.14853	0.442797	1	1	1	AFP; GP2; PON1; IGFBP5; ALB;
Vulva/anal skin	53	6377	37.5887	1.07863	0.27385	1	1	1	TEX14; PAK1; AFP; SLC22A17; FGFR3; RAB6A; MYO7A; KAT6A; GP2; ATP2A3; CNTN3; KIF12; CCND1; GPC3; BMP2K; RAB1B; LETM2; ITGB8; TMEM26; ZNF703; HMGCLL1; TMTC2; BARHL1; PON1; RSF1; EGLN2; ADARB2; UPP2; COL2A1; NUMA1; LRRN1; SEMA3F; IGFBP5; CTSF; NHS; ITPR2; GATA3; ARAP1; ALB; B4GAT1; RHOD; PTPRT; KRBA2; CCS; SORCS1; FAM110B; RAD9A; ULK2; CHTOP; ARMT1; MOV10L1; WNK3; SART1;
	6	1183	4.25532	0.659199	0.899868	1	1	1	RAB6A; BMP2K; FIBP; ITPR2; ALB; GOLGA7;
HH4	19	2684	13.4752	0.919027	0.691811	1	1	1	PAK1; CCDC177; OR2G6; KLC2; LONRF2; GPC3; BMP2K; TMTC2; RSF1; CFL1; ADARB2; NUMA1; ARHGEF17; ATG16L2; CTSF; NHS; ALB; RBM4; ADGRG2;
Ramos	10	1566	7.0922	0.829411	0.776274	1	1	1	ATP2A3; AFF3; BMP2K; SF3B2; FIBP; NUMA1; ITPR2; ALB; GOLGA7; PHLDB2;
Leukocytes	24	2845	17.0213	1.09506	0.348167	1	1	1	PAK1; ATP2A3; RAB1B; FAM168A; MGAT4A; TCEAL1; RSF1; CFL1; NUMA1; ARRB1; ANK1; CDYL2; ADAM28; ARAP1; ALB; B4GAT1; XRRA1; JADE2; CCS; TP53TG5; GOLGA7; PHLDB2; CHST10; SART1;
Renal cancer	55	7121	39.0071	1.00238	0.523447	1	1	1	TEX14; PAK1; AFP; SLC22A17; RAB6A; MYO7A; KAT6A; GP2; ATP2A3; KIF12; CCND1; GPC3; BMP2K; RAB1B; LETM2; NOVA1; MGAT4A; FIBP; ITGB8; TMEM26; ZNF703; HMGCLL1; TMTC2; BARHL1; PON1; RSF1; EGLN2; ADARB2; NUMA1; ANK1; LRRN1; ARHGEF17; SEMA3F; IGFBP5; CTSF; NHS; ITPR2; GATA3; ARAP1; DRAP1; ALB; F3; B4GAT1; RHOD; PTPRT; CCS; SORCS1; FAM110B; RAD9A; ULK2; CHTOP; ARMT1; CHST10; ADGRG2; SART1;
Aorta	3	530	2.12766	0.736907	0.779399	1	1	1	ATP2A3; CFL1; ALB;
Thyroid	5	889	3.5461	0.731242	0.820872	1	1	1	SLC22A17; CNTN3; NOVA1; PON1; ARRB1;
hupo46_reference_cam	8	1042	5.67376	0.997449	0.555951	1	1	1	RAB1B; ITGB8; PON1; CFL1; ANK1; ITPR2; ALB; SART1;
Substantia nigra	9	1146	6.38298	1.02016	0.525945	1	1	1	ATP2A3; TNRC18; RNF169; LRRN1; ADAM28; FFAR1; ARNTL; CHST10; SH3BP5L;
Vagina	44	5307	31.2057	1.07605	0.310435	1	1	1	TEX14; PAK1; AFP; SLC22A17; FGFR3; RAB6A; MYO7A; KAT6A; ATP2A3; KIF12; CCND1; GPC3; BMP2K; RAB1B; NOVA1; ITGB8; ZNF703; HMGCLL1; TMTC2; BARHL1; PON1; RSF1; ADARB2; UPP2; NUMA1; SEMA3F; IGFBP5; ITPR2; GATA3; DRAP1; ALB; F3; B4GAT1; RHOD; PTPRT; KRBA2; CCS; SORCS1; FAM110B; RAD9A; CHTOP; CHST10; WNK3; SART1;
Monocytes	3	745	2.12766	0.524245	0.930215	1	1	1	ATP2A3; FFAR1; F3;
MDA-MB-468	7	770	4.96454	1.18128	0.382733	1	1	1	SF3B2; CFL1; NUMA1; ALB; RBM4B; ARMT1; RBM4;
Platelets	11	2168	7.80142	0.658956	0.954624	1	1	1	RAB6A; ATP2A3; RAB1B; PON1; CFL1; ARRB1; RAI2; ITPR2; ARAP1; ALB; CCS;
HL60	3	545	2.12766	0.716625	0.795244	1	1	1	DENND1B; ALB; F3;
TOV21G	6	904	4.25532	0.862644	0.702384	1	1	1	SF3B2; CFL1; NUMA1; CTSF; ALB; B4GAT1;
Oral mucosa	48	5861	34.0426	1.06289	0.333059	1	1	1	TEX14; PAK1; AFP; SLC22A17; FGFR3; RAB6A; MYO7A; KAT6A; GP2; ATP2A3; KIF12; CCND1; GPC3; BMP2K; RAB1B; NOVA1; ITGB8; ZNF703; HMGCLL1; TMTC2; BARHL1; PON1; RSF1; EGLN2; ADARB2; UPP2; NUMA1; ARHGEF17; SEMA3F; IGFBP5; NHS; GATA3; DRAP1; ALB; F3; RHOD; PTPRT; KRBA2; CCS; SORCS1; FAM110B; RAD9A; ULK2; CHTOP; ARMT1; CHST10; WNK3; SART1;
Esophagus	51	6034	36.1702	1.09693	0.234485	1	1	1	TEX14; PAK1; AFP; SLC22A17; FGFR3; RAB6A; MYO7A; KAT6A; GP2; ATP2A3; KIF12; CCND1; GPC3; BMP2K; RAB1B; MGAT4A; FIBP; ITGB8; ZNF703; HMGCLL1; TMTC2; BARHL1; RSF1; ADARB2; UPP2; NUMA1; LRRN1; ARHGEF17; SEMA3F; IGFBP5; CTSF; NHS; ITPR2; GATA3; ARAP1; DRAP1; ALB; B4GAT1; RHOD; PTPRT; KRBA2; CCS; SORCS1; FAM110B; RAD9A; ULK2; CHTOP; PHLDB2; CHST10; WNK3; SART1;
Corpus callosum	7	988	4.96454	0.920634	0.644041	1	1	1	CNTN3; TNRC18; RNF169; LRRN1; ARNTL; CHST10; SH3BP5L;
NB4	4	711	2.83688	0.731811	0.802603	1	1	1	CFL1; ITPR2; ALB; F3;
Mammary gland	8	760	5.67376	1.36755	0.232607	1	1	1	ESRRB; ATP2A3; GPC3; NUMA1; PELI3; ADAM28; ALB; DOK6;
19_proteinag	2	98	1.41844	2.66107	0.174623	1	1	1	PON1; ALB;
031003_BALF2	6	1102	4.25532	0.707651	0.858912	1	1	1	AFP; PON1; CFL1; NUMA1; ALB; ARMT1;
Tears	3	510	2.12766	0.765805	0.756736	1	1	1	CFL1; ALB; F3;
Cellzome_Abl_inhibitors_NatureBiotechnology_exp144	3	186	2.12766	2.09972	0.173354	1	1	1	ITPR2; ALB; PHLDB2;
CaOV3	22	3355	15.6028	0.851249	0.828849	1	1	1	PAK1; RAB6A; KLC2; RAB1B; SF3B2; PON1; FCHSD2; RELT; CFL1; COL2A1; NUMA1; ARRB1; TPPP; SEMA3F; IGFBP5; ALB; F3; B4GAT1; CCS; CHTOP; ARMT1; RBM4;
Cerebrospinal fluid	11	1059	7.80142	1.34902	0.193882	1	1	1	CNTN3; PON1; CFL1; NUMA1; LRRN1; IGFBP5; CTSF; ALB; B4GAT1; GLDN; SORCS1;
Melanoma	9	1826	6.38298	0.640253	0.949689	1	1	1	RAB6A; KIF12; RAB1B; CFL1; NUMA1; TPPP; DRAP1; ALB; SART1;
hupo1_b1-hep_cam	2	80	1.41844	3.25973	0.126578	1	1	1	PON1; ALB;
Subthalamic nucleus	9	882	6.38298	1.32551	0.240391	1	1	1	ATP2A3; CNTN3; TNRC18; RNF169; LRRN1; ADAM28; ARNTL; CHST10; SH3BP5L;
Dentin	2	246	1.41844	1.06017	0.567739	1	1	1	IGFBP5; ALB;
J82	1	216	0.70922	0.606705	0.813797	1	1	1	CFL1;
15_clinprot_c3	8	749	5.67376	1.38763	0.22117	1	1	1	SF3B2; PON1; CFL1; NUMA1; KDM4B; ALB; RBM4B; RBM4;
Ubiquitous	15	1052	10.6383	1.85136	0.0157116	1	1	1	NEU3; MUS81; RGS21; RSF1; CFL1; TPPP; CDYL2; CTSF; B4GAT1; ZNF281; JADE2; TP53TG5; GOLGA7; SART1; ACER3;
Cortex	4	683	2.83688	0.761811	0.776506	1	1	1	PAK1; CFL1; TPPP; ALB;
N06cs122	2	123	1.41844	2.12024	0.244917	1	1	1	CFL1; ALB;
17_wcx	12	1438	8.51064	1.08371	0.430801	1	1	1	ATP2A3; BMP2K; PON1; RSF1; CFL1; NUMA1; KDM4B; ARAP1; ALB; RBM4B; TLE3; RBM4;
hupo1_b2-edta_cam	2	316	1.41844	0.825326	0.702975	1	1	1	PON1; ALB;
H23	4	896	2.83688	0.580713	0.919231	1	1	1	SF3B2; RELT; CFL1; NUMA1;
YTS	9	1888	6.38298	0.619228	0.961385	1	1	1	RAB6A; ATP2A3; KLC2; RAB1B; NEU3; CFL1; ITPR2; ALB; GOLGA7;
hupo1_b2-hep_cam	9	848	6.38298	1.37865	0.207646	1	1	1	RAB6A; ATP2A3; RAB1B; MGAT4A; PON1; NUMA1; ITPR2; ALB; B4GAT1;
Embryonic stem cells	17	3047	12.0567	0.72437	0.948382	1	1	1	PAK1; RAB6A; MYO7A; ATP2A3; RAB1B; SLC4A8; SF3B2; CFL1; LRRN1; ITPR2; ALB; B4GAT1; TLE3; CHTOP; GOLGA7; RBM4; SART1;
Saliva	5	912	3.5461	0.712801	0.837516	1	1	1	MGAT4A; CFL1; ALB; DOK6; ADGRG2;
Nuclear	6	1319	4.25532	0.59123	0.946034	1	1	1	RSF1; CFL1; NUMA1; ANK1; TLE3; RBM4;
N06CS98-2	1	165	0.70922	0.794221	0.72258	1	1	1	CFL1;
MV4-11	3	382	2.12766	1.0224	0.56719	1	1	1	BMP2K; FIBP; CFL1;
Caudate nucleus	11	1204	7.80142	1.18655	0.323994	1	1	1	ATP2A3; CNTN3; TNRC18; RNF169; LRRN1; ADAM28; FFAR1; CCS; ARNTL; CHST10; SH3BP5L;
Retina	6	364	4.25532	2.14235	0.0628814	1	1	1	MYO7A; BBS1; NR2E3; CABP4; RAI2; NHS;
Medulla oblongata	4	473	2.83688	1.10003	0.496606	1	1	1	ATP2A3; ADAM28; FFAR1; CHST10;
Bladder cancer cells	4	369	2.83688	1.41006	0.317252	1	1	1	RAB6A; RAB1B; CFL1; ALB;
PC3(AR)6	4	262	2.83688	1.9859	0.144325	1	1	1	CFL1; COL2A1; SEMA3F; IGFBP5;
Neutrophils	3	393	2.12766	0.993787	0.586524	1	1	1	RAB1B; CFL1; ALB;
Parathyroid	8	782	5.67376	1.32908	0.256091	1	1	1	SLC22A17; FGFR3; NOVA1; PON1; ARRB1; CTSF; CHST10; ADGRG2;
HEK293	25	4439	17.7305	0.731068	0.975447	1	1	1	RAB6A; KAT6A; KLC2; BMP2K; RAB1B; MUS81; SF3B2; TCEAL1; RSF1; FCHSD2; CFL1; COL2A1; NUMA1; ITPR2; DRAP1; ALB; FAM169A; RBM4B; ZNF281; TLE3; RAD9A; CHTOP; ARMT1; RBM4; SART1;
A549	8	997	5.67376	1.04247	0.505122	1	1	1	PAK1; KAT6A; SF3B2; CFL1; TPPP; KDM4B; THAP1; WNK3;
Semen	11	966	7.80142	1.47889	0.126288	1	1	1	GP2; CNTN3; RAB1B; BBS1; CFL1; SEMA3F; IGFBP5; CTSF; ALB; B4GAT1; ADGRG2;
Fetus	26	2992	18.4397	1.128	0.282422	1	1	1	AFP; ATP2A3; AFF3; BBS1; FOXD4L4; NR2E3; NAGS; RSF1; TNRC18; RNF169; LRRN1; RAI2; IGFBP5; NHS; FFAR1; B4GAT1; DOK6; PTPRT; ZNF281; CCS; SORCS1; PHLDB2; CHST10; SH3BP5L; WNK3; SART1;
MCF7	3	317	2.12766	1.23204	0.442881	1	1	1	CFL1; NUMA1; IGFBP5;
Corneal epithelial cells	1	28	0.70922	4.67884	0.194884	1	1	1	FGFR3;
051503_BAL20_gly_hui	2	268	1.41844	0.97314	0.614498	1	1	1	PON1; ALB;
Adducin	4	486	2.83688	1.07061	0.517901	1	1	1	CFL1; ANK1; RBM4; SART1;
MCF10A	2	661	1.41844	0.394565	0.965389	1	1	1	SF3B2; CFL1;
22_mars	2	196	1.41844	1.3306	0.447218	1	1	1	PON1; ALB;
041803_BALF3	6	1103	4.25532	0.707009	0.859491	1	1	1	SF3B2; PON1; CFL1; NUMA1; ANK1; ALB;
Macrophages	1	274	0.70922	0.478283	0.881839	1	1	1	FFAR1;
Muscle	5	904	3.5461	0.719109	0.831874	1	1	1	PAK1; NEU3; BBS1; FFAR1; RBM4;
MicroProt2	5	561	3.5461	1.15877	0.435221	1	1	1	PON1; CFL1; KDM4B; IGFBP5; ALB;
Hypothalamus	1	147	0.70922	0.891466	0.680748	1	1	1	FFAR1;
Endometrium	9	1202	6.38298	0.972628	0.584552	1	1	1	SLC22A17; ESRRB; CNTN3; NOVA1; PON1; CTSF; ALB; CHST10; ADGRG2;
Thalamus	10	1141	7.0922	1.13835	0.384228	1	1	1	ATP2A3; CNTN3; TNRC18; ADARB2; RNF169; LRRN1; ADAM28; FFAR1; CHST10; SH3BP5L;
Putamen	4	527	2.83688	0.987315	0.582151	1	1	1	ATP2A3; ADAM28; FFAR1; CHST10;
PT45	1	361	0.70922	0.363022	0.940433	1	1	1	CFL1;
Colorectal cancer cells	5	561	3.5461	1.15877	0.435221	1	1	1	RAB6A; RAB1B; CFL1; ALB; GOLGA7;
Jejunum	1	194	0.70922	0.675503	0.778823	1	1	1	RAB6A;
ARPE-19	2	330	1.41844	0.790313	0.725411	1	1	1	RAB6A; ALB;
BOB2H_ISB	2	98	1.41844	2.66107	0.174623	1	1	1	PON1; ALB;
Temporal lobe	2	477	1.41844	0.546763	0.885783	1	1	1	ATP2A3; CHST10;
hupo53_reference_cam	2	104	1.41844	2.50756	0.191234	1	1	1	PON1; ALB;
RMUG	5	499	3.5461	1.30274	0.340415	1	1	1	CFL1; SEMA3F; CTSF; ALB; B4GAT1;
DU145	6	941	4.25532	0.828725	0.738321	1	1	1	AFP; RAB6A; RAB1B; CFL1; F3; GOLGA7;
Lacrimal glands	2	453	1.41844	0.575729	0.867457	1	1	1	CFL1; F3;
hupo1_b1-edta_cam	1	42	0.70922	3.1196	0.277674	1	1	1	ALB;
Cervix	1	104	0.70922	1.26002	0.553729	1	1	1	FGFR3;
Epidermis	1	95	0.70922	1.37937	0.521369	1	1	1	F3;
Cervico-vaginal fluid	3	565	2.12766	0.691259	0.814897	1	1	1	BMP2K; CFL1; ALB;
Uterine cervix	7	902	4.96454	1.00841	0.547113	1	1	1	SLC22A17; CCND1; NOVA1; PON1; ARRB1; CTSF; CHST10;
Thymus	3	456	2.12766	0.85649	0.686319	1	1	1	MGAT4A; IGFBP5; PHLDB2;
Aspc1	3	483	2.12766	0.808613	0.723248	1	1	1	CFL1; ARRB1; B4GAT1;
Vermiform appendix	4	286	2.83688	1.81925	0.179562	1	1	1	FGFR3; ATP2A3; NUMA1; ADAM28;
Cardiomyocytes	1	31	0.70922	4.2262	0.213383	1	1	1	F3;
Bone	4	112	2.83688	4.64534	0.0110527	1	1	1	PELI3; IGFBP5; FFAR1; SART1;
Trachea	6	612	4.25532	1.27423	0.333293	1	1	1	ATP2A3; MGAT4A; PELI3; ADAM28; ARAP1; CCS;
Astrocytes	1	58	0.70922	2.25917	0.361984	1	1	1	CCS;
050603_BALF11	4	1019	2.83688	0.510618	0.957979	1	1	1	ATP2A3; CFL1; NUMA1; ALB;
HCC78	3	249	2.12766	1.56848	0.301112	1	1	1	TEX14; CFL1; PHLDB2;
RBC	3	267	2.12766	1.46275	0.339051	1	1	1	INTS4; ANK1; ALB;
Hepatocytes	1	73	0.70922	1.79502	0.432122	1	1	1	FGFR3;
Nervous system	1	212	0.70922	0.618152	0.807874	1	1	1	FGFR3;
HPDE6	1	414	0.70922	0.316549	0.960819	1	1	1	CFL1;
Occipital lobe	2	359	1.41844	0.726473	0.767377	1	1	1	ATP2A3; ADAM28;
N06CS97	1	270	0.70922	0.485369	0.878068	1	1	1	ALB;
Blood vessels	1	130	0.70922	1.00803	0.635511	1	1	1	ADRA1B;
NIBSC_glyco_qstar	1	60	0.70922	2.18388	0.371811	1	1	1	ALB;
Cartilage	3	89	2.12766	4.38791	0.031463	1	1	1	FGFR3; COL2A1; FFAR1;
MiaPaCa2	2	289	1.41844	0.90243	0.655462	1	1	1	CFL1; B4GAT1;
Intestine	6	508	4.25532	1.53508	0.198666	1	1	1	FGFR3; MYO7A; GPC3; NUMA1; CDYL2; FFAR1;
Blood	1	227	0.70922	0.577307	0.829165	1	1	1	PON1;
Stem cell	1	138	0.70922	0.949601	0.657541	1	1	1	ALB;
Pituitary gland	3	494	2.12766	0.790608	0.737301	1	1	1	ATP2A3; RSF1; FFAR1;
BOBFreezeThaw	2	64	1.41844	4.07454	0.0872814	1	1	1	PON1; ALB;
Vulva	7	838	4.96454	1.08542	0.468762	1	1	1	SLC22A17; FGFR3; CNTN3; CCND1; PON1; COL2A1; CTSF;
032403_BALF4_glypep	1	43	0.70922	3.04707	0.283253	1	1	1	ALB;
B cells	5	533	3.5461	1.21964	0.392492	1	1	1	RAB6A; RAB1B; CFL1; ALB; GOLGA7;
SH-SY5Y	5	537	3.5461	1.21056	0.398618	1	1	1	CFL1; EGLN2; NUMA1; ALB; RBM4B;
Cytoskeleton	2	86	1.41844	3.03234	0.142231	1	1	1	ANK1; ARAP1;
Pancreatic fluid	4	136	2.83688	3.82564	0.0210873	1	1	1	RAB1B; PON1; CFL1; ALB;
20_cys	2	96	1.41844	2.7165	0.16914	1	1	1	PON1; ALB;
hupo1_b1-cit_cam	2	71	1.41844	3.67288	0.103978	1	1	1	PON1; ALB;
Panc1	2	346	1.41844	0.753768	0.749295	1	1	1	CFL1; B4GAT1;
Frontal lobe	1	480	0.70922	0.273024	0.976785	1	1	1	CHST10;
Breast milk	1	73	0.70922	1.79502	0.432122	1	1	1	CFL1;
Lymphocytes	5	468	3.5461	1.38903	0.293495	1	1	1	AFF3; NHS; ADAM28; F3; ZNF281;
Globus pallidus	1	23	0.70922	5.69554	0.163088	1	1	1	FFAR1;
01_glyco	7	667	4.96454	1.36369	0.2556	1	1	1	MYO7A; PON1; CFL1; ZDHHC11; NUMA1; ALB; STXBP5;
Nucleus accumbens	1	166	0.70922	0.789437	0.724737	1	1	1	FFAR1;
Striatum	1	28	0.70922	4.67884	0.194884	1	1	1	FFAR1;
21_unfract	2	95	1.41844	2.74509	0.16641	1	1	1	PON1; ALB;
Frontal cortex	2	113	1.41844	2.30786	0.21651	1	1	1	PTPRT; WNK3;
Kidney cancer	3	352	2.12766	1.10954	0.511803	1	1	1	COL2A1; ARHGEF17; ALB;
Eyes	1	122	0.70922	1.07413	0.612075	1	1	1	MYO7A;
H2228	1	168	0.70922	0.780039	0.729002	1	1	1	CFL1;
hupo1_b2-cit_cam	1	65	0.70922	2.01591	0.395725	1	1	1	ALB;
Peripheral blood leukocytes	1	125	0.70922	1.04835	0.621034	1	1	1	MGAT4A;
Osteoblasts	1	52	0.70922	2.51979	0.331579	1	1	1	IGFBP5;
H1703	1	138	0.70922	0.949601	0.657541	1	1	1	CFL1;
Cellzome_Abl_inhibitors_NatureBiotechnology_exp142	1	83	0.70922	1.57878	0.47457	1	1	1	FIBP;
Adipose tissue	3	155	2.12766	2.51963	0.117887	1	1	1	BBS1; EGLN2; FFAR1;
Occipital pole	1	129	0.70922	1.01585	0.63266	1	1	1	CHST10;
hupo55_b1-cit_cam	1	78	0.70922	1.67997	0.453755	1	1	1	ALB;
Tongue	1	54	0.70922	2.42648	0.341871	1	1	1	NUMA1;
N06cs110	1	87	0.70922	1.5062	0.490654	1	1	1	CFL1;
BOB2L	2	96	1.41844	2.7165	0.16914	1	1	1	PON1; ALB;
Peripheral blood cells	1	140	0.70922	0.936036	0.662839	1	1	1	RGS21;
Lymph	1	22	0.70922	5.95431	0.15658	1	1	1	ATP2A3;
Hematopoietic cells	1	22	0.70922	5.95431	0.15658	1	1	1	ALB;
Cornea	1	82	0.70922	1.59803	0.470471	1	1	1	FGFR3;
Retinal pigmented epithelial cells	1	51	0.70922	2.56919	0.326374	1	1	1	NHS;
18_size	2	104	1.41844	2.50756	0.191234	1	1	1	PON1; ALB;
16_clinprot_c8	2	92	1.41844	2.8346	0.158268	1	1	1	PON1; ALB;
b1-SE_nonglyco_qstar	1	90	0.70922	1.456	0.502395	1	1	1	ALB;
Submandibular gland	2	25	1.41844	10.4283	0.0157524	1	1	1	FGFR3; SLC4A8;
AdducinII	2	116	1.41844	2.24818	0.225006	1	1	1	ALB; ARMT1;
Granulosa lutein cells	1	28	0.70922	4.67884	0.194884	1	1	1	ESRRB;
BOB_Sensitivity	2	129	1.41844	2.02164	0.26204	1	1	1	PON1; ALB;
Pulmonary artery	1	15	0.70922	8.73114	0.1096	1	1	1	F3;
Islets of Langerhans	3	135	2.12766	2.89288	0.0864711	1	1	1	FGFR3; CFL1; ALB;
Atrium	1	146	0.70922	0.897571	0.678249	1	1	1	ARHGEF17;
Corpus luteum	1	12	0.70922	10.9121	0.0886792	1	1	1	IGFBP5;
Cardiac muscle	1	64	0.70922	2.0474	0.391016	1	1	1	SART1;
Neural stem cells	3	67	2.12766	5.8285	0.0149867	1	1	1	TEX14; NUMA1; CTSF;
Hair follicle	1	83	0.70922	1.57878	0.47457	1	1	1	TLE3;
Cytotrophoblasts	1	39	0.70922	3.35951	0.260677	1	1	1	AFP;
Lymphoblast	1	13	0.70922	10.0734	0.0957067	1	1	1	DPY19L2;
Bile duct	1	31	0.70922	4.2262	0.213383	1	1	1	FGFR3;
Superior frontal gyrus	1	10	0.70922	13.0923	0.0744613	1	1	1	FFAR1;
Cochlea	1	28	0.70922	4.67884	0.194884	1	1	1	MYO7A;
Schwann cells	1	17	0.70922	7.70455	0.123282	1	1	1	FGFR3;
Malignant pleural effusions	1	31	0.70922	4.2262	0.213383	1	1	1	ALB;
Sublingual gland	1	10	0.70922	13.0923	0.0744613	1	1	1	FGFR3;
Coronary arteries	1	32	0.70922	4.09417	0.219456	1	1	1	FGFR3;
BOB2L_ISB	2	87	1.41844	2.99749	0.144879	1	1	1	PON1; ALB;
Insular cortex membrane micro domains	2	75	1.41844	3.47702	0.113879	1	1	1	ALB; WNK3;
Middle frontal gyrus	1	7	0.70922	18.6953	0.0527205	1	1	1	FFAR1;
Oviduct	1	11	0.70922	11.9032	0.0815976	1	1	1	FGFR3;
Alveolus	1	14	0.70922	9.35435	0.10268	1	1	1	F3;
Yolk sac	1	5	0.70922	26.1586	0.0379457	1	1	1	AFP;
Locus coeruleus	1	17	0.70922	7.70455	0.123282	1	1	1	FFAR1;
Respiratory system	1	4	0.70922	32.6819	0.0304727	1	1	1	FGFR3;
Submucosa	1	6	0.70922	21.8061	0.0453615	1	1	1	FGFR3;
HUPO28_b1-CIT	2	37	1.41844	7.04705	0.0329376	1	1	1	PON1; ALB;
Cingulate gyrus	1	11	0.70922	11.9032	0.0815976	1	1	1	FFAR1;
Sympathetic (chain) ganglionic trunk	1	3	0.70922	43.5397	0.0229421	1	1	1	FGFR3;
Muscularis mucosa	1	3	0.70922	43.5397	0.0229421	1	1	1	FGFR3;
Alveoli	1	3	0.70922	43.5397	0.0229421	1	1	1	F3;
Adrenal	1	2	0.70922	65.2012	0.0153534	1	1	1	RSF1;
Pituitary acidophil	1	3	0.70922	43.5397	0.0229421	1	1	1	FGFR3;
Corneal endothelial cell	1	3	0.70922	43.5397	0.0229421	1	1	1	FGFR3;
Pituitary basophil	1	3	0.70922	43.5397	0.0229421	1	1	1	FGFR3;

## Sheet: Transcription factor
Transcription factor of Co-expressed genes with CHRNA6
Analysis: Transcription factor
Dataset name: CHRNA6 Co-expressed2
Number of genes in the dataset: 145
Number of genes in the dataset (which are available in Transcription factor database) :125
Number of genes in background: 15253
Is analysis quantitative: No
						Corrected p-values
Transcription factor	No. of genes in the dataset	No. of genes in the background dataset	Percentage of genes	Fold enrichment	P-value (Hypergeometric test)	Bonferroni method	BH method	Q-value (Storey-Tibshirani method)	genes mapped (from input data set)
MAFB	5	352	4	1.73657	0.162869	1	0.727714	1	SLC22A17; COL28A1; LETM2; UPP2; SORCS1;
NFIC	27	2040	21.6	1.61549	0.00734141	1	0.215122	0.364493	AFP; KAT6A; COL28A1; CCND1; BMP2K; SLC4A8; ITGB8; TMTC2; RSF1; GDPD5; FCHSD2; TNRC18; COL2A1; ARRB1; PELI3; RANBP3L; ATG16L2; RAI2; IGFBP5; ITPR2; F3; PTPRT; JADE2; SORCS1; ARNTL; CHTOP; PHLDB2;
NR1H3	9	1020	7.2	1.07778	0.459304	1	1	1	AQP11; GPC3; NOVA1; TMEM26; UPP2; THAP1; DOK6; TLE3; TP53TG5;
PITX3	3	265	2.4	1.38585	0.370261	1	0.919808	1	MYO7A; PCDH20; CABP4;
RXRA	11	1113	8.8	1.20698	0.303851	1	0.886233	1	AQP11; RASSF6; GPC3; NOVA1; TMEM26; UPP2; NHS; THAP1; DOK6; TP53TG5; ARNTL;
SOAT1	12	1261	9.6	1.16208	0.337895	1	0.919808	1	RASSF6; SLC4A8; FIBP; ITGB8; BARHL1; RAI2; ST6GALNAC5; STXBP5; SORCS1; ARNTL; RBM4; WNK3;
STAT1	12	1261	9.6	1.16208	0.337895	1	0.919808	1	RASSF6; SLC4A8; FIBP; ITGB8; BARHL1; RAI2; ST6GALNAC5; STXBP5; SORCS1; ARNTL; RBM4; WNK3;
DLX2	1	171	0.8	0.720627	0.757092	1	1	1	GATA3;
DLX3	5	413	4	1.48009	0.250871	1	0.836236	1	AFF3; CCND1; PCDH20; ADARB2; DLGAP1;
ETS1	20	2496	16	0.978164	0.581612	1	1	1	ATP2A3; COL28A1; CNTN3; KIF12; NOVA1; MGAT4A; FIBP; UPP2; ATG16L2; RAI2; ST6GALNAC5; ITPR2; GATA3; RNF128; EIF1AD; RHOD; STXBP5; KRBA2; JADE2; WNK3;
HNF1A	12	831	9.6	1.76339	0.0399154	1	0.424738	0.719658	AFP; RAB6A; ADRA1B; CNTN3; KIF12; RASSF6; CCND1; MGAT4A; FCHSD2; TNRC18; RAI2; ALB;
HOXC9	6	573	4.8	1.27974	0.329536	1	0.919808	1	GPC3; ADARB2; UPP2; JADE2; SORCS1; PHLDB2;
IRF1	6	811	4.8	0.904189	0.659126	1	1	1	CCND1; FAM168A; RSF1; TNRC18; GATA3; DLGAP1;
LHX3	15	1210	12	1.51357	0.0699131	1	0.506267	0.857798	AFP; ESRRB; RASSF6; RGS8; NOVA1; BARHL1; ADARB2; UPP2; ST6GALNAC5; ALB; FAM169A; DLGAP1; ZNF281; SORCS1; ARNTL;
MEF2A	10	1835	8	0.665589	0.943791	1	1	1	ATP2A3; RGS8; ADARB2; ANK1; ST6GALNAC5; DLGAP1; JADE2; ARNTL; CHTOP; ADGRG2;
NKX6-1	12	1408	9.6	1.04075	0.488056	1	1	1	AFP; RASSF6; RGS8; BMP2K; NOVA1; TMEM26; UPP2; RAI2; DLGAP1; TLE3; JADE2; SORCS1;
OTX2	2	324	1.6	0.756917	0.747669	1	1	1	UPP2; WNK3;
PHOX2A	3	442	2.4	0.830893	0.706511	1	1	1	NOVA1; ADARB2; SORCS1;
POU2F1	33	2209	26.4	1.8233	0.000337575	0.0708909	0.0496265	0.084085	SLC22A17; RAB6A; CYP4X1; KAT6A; ADRA1B; COL28A1; AFF3; CNTN3; CCND1; RGS8; LETM2; NOVA1; PCDH20; MGAT4A; ITGB8; TMEM26; TMTC2; PON1; FCHSD2; RELT; TNRC18; EGLN2; ADARB2; UPP2; MCC; RANBP3L; GLDN; PTPRT; ZNF281; JADE2; SORCS1; ARNTL; ADGRG2;
POU3F2	11	789	8.8	1.70261	0.0590781	1	0.495889	0.840213	AFP; AFF3; RGS8; ITGB8; UPP2; RANBP3L; ALB; FAM169A; TLE3; SORCS1; ARNTL;
SRF	8	462	6.4	2.1154	0.0363064	1	0.423575	0.717687	NOVA1; MUS81; ITGB8; RSF1; CFL1; ST6GALNAC5; TLE3; PHLDB2;
ARID3A	16	1250	12.8	1.56275	0.049231	1	0.462965	0.784428	RGS8; GPC3; PCDH20; TMEM26; ZNF703; BARHL1; TNRC18; ADARB2; RANBP3L; CDYL2; IGFBP5; ST6GALNAC5; ITPR2; ALB; GLDN; ARNTL;
EHF	4	753	3.2	0.649762	0.870946	1	1	1	SF3B2; FIBP; EIF1AD; SART1;
FOXA1	15	804	12	2.27788	0.00239661	0.503287	0.125822	0.213187	ADRA1B; RASSF6; NOVA1; PCDH20; ADARB2; UPP2; MCC; RANBP3L; GATA3; PTPRT; TLE3; JADE2; NKX2-8; CHTOP; PHLDB2;
ATF1	7	1037	5.6	0.824795	0.754104	1	1	1	PAK1; LETM2; MGAT4A; RELT; GATA3; TLE3; MOV10L1;
CREB1	8	973	6.4	1.00444	0.548437	1	1	1	PAK1; RAB6A; LETM2; MGAT4A; GATA3; TLE3; TP53TG5; MOV10L1;
JDP2	6	763	4.8	0.96107	0.599759	1	1	1	PAK1; MYO7A; LETM2; MGAT4A; RANBP3L; MOV10L1;
NFYA	22	2544	17.6	1.05563	0.427544	1	0.986641	1	AQP11; RAB6A; ESRRB; COL28A1; AFF3; CCND1; RGS8; GPC3; LETM2; SLC4A8; BARHL1; FCHSD2; NUMA1; KDM4B; CTSF; ITPR2; GATA3; XRRA1; TLE3; ARNTL; PHLDB2; RBM4;
PLAU	7	1037	5.6	0.824795	0.754104	1	1	1	PAK1; LETM2; MGAT4A; RELT; GATA3; TLE3; MOV10L1;
RORA	10	1168	8	1.04568	0.490717	1	1	1	AFP; ESRRB; MGAT4A; ADARB2; UPP2; COL2A1; MCC; SORCS1; ARNTL; PHLDB2;
YY1	14	1317	11.2	1.29796	0.189996	1	0.767293	1	CCND1; RAB1B; LETM2; NOVA1; TNRC18; RANBP3L; ST6GALNAC5; THAP1; RBM4B; TLE3; PHLDB2; SH3BP5L; RBM4; WNK3;
ELK1	13	1986	10.4	0.799294	0.843671	1	1	1	BMP2K; PCDH20; SF3B2; TNRC18; CFL1; GLCE; MCC; ATG16L2; FFAR1; THAP1; EIF1AD; KRBA2; PHLDB2;
GABPA	14	2702	11.2	0.632648	0.983489	1	1	1	AFF3; BMP2K; MUS81; SF3B2; MGAT4A; FIBP; TNRC18; CFL1; COL2A1; NUMA1; GLCE; EIF1AD; JADE2; SH3BP5L;
CTCF	20	2605	16	0.937235	0.66267	1	1	1	FGFR3; MYO7A; KAT6A; ADRA1B; BMP2K; LETM2; SLC4A8; MGAT4A; ANKRD13D; TMTC2; PON1; RSF1; TNRC18; ARRB1; ARHGEF17; IGFBP5; RBM4B; PTPRT; TLE3; SORCS1;
FEV	4	526	3.2	0.930168	0.629837	1	1	1	FCHSD2; MCC; PHLDB2; ADGRG2;
HERPUD1	5	421	4	1.45196	0.263258	1	0.850028	1	RAB6A; SLC4A8; ITGB8; NHS; PTPRT;
KLF7	39	4448	31.2	1.07009	0.338778	1	0.919808	1	SLC22A17; RAB6A; KLC2; KIF12; CCDC74B; NOVA1; BBS1; MUS81; SLC4A8; SF3B2; FIBP; TCEAL1; CABP4; NAGS; PON1; RSF1; GDPD5; TNRC18; CFL1; EGLN2; NUMA1; ARRB1; GLCE; RNF169; PELI3; ARHGEF17; RAI2; IGFBP5; GATA3; DRAP1; RBM4B; RHOD; KRBA2; TLE3; JADE2; RAD9A; CHTOP; GOLGA7; RBM4;
MAF	4	466	3.2	1.04993	0.533641	1	1	1	SLC4A8; FCHSD2; RAI2; CHTOP;
NANOG	1	204	0.8	0.604061	0.815482	1	1	1	RANBP3L;
NR5A1	12	1129	9.6	1.29794	0.214327	1	0.77601	1	PAK1; MYO7A; SLC4A8; FCHSD2; TNRC18; ADARB2; ST6GALNAC5; FAM169A; F3; EIF1AD; JADE2; PHLDB2;
RFX1	23	2158	18.4	1.30099	0.109766	1	0.640302	1	MYO7A; KAT6A; COL28A1; CCDC74B; LETM2; BBS1; SLC4A8; ITGB8; ANKRD13D; GDPD5; FCHSD2; COL2A1; NUMA1; ARHGEF17; NHS; PTPRT; STXBP5; CCS; SORCS1; FAM110B; TP53TG5; ARNTL; WNK3;
RREB1	20	2136	16	1.14302	0.295092	1	0.885276	1	KAT6A; ATP2A3; KIF12; GPC3; FAM168A; BARHL1; RSF1; FCHSD2; RELT; GLCE; RAI2; IGFBP5; NHS; RBM4B; B4GAT1; DLGAP1; TLE3; JADE2; TP53TG5; GOLGA7;
SF1	12	1129	9.6	1.29794	0.214327	1	0.77601	1	PAK1; MYO7A; SLC4A8; FCHSD2; TNRC18; ADARB2; ST6GALNAC5; FAM169A; F3; EIF1AD; JADE2; PHLDB2;
SP1	67	7140	53.6	1.14512	0.0754214	1	0.52795	0.894536	PAK1; AQP11; SLC22A17; RAB6A; CYP4X1; KAT6A; KLC2; KIF12; CCND1; INTS4; CCDC74B; RAB1B; NEU3; NOVA1; BBS1; PCDH20; MUS81; SLC4A8; FAM168A; SF3B2; FIBP; ITGB8; ZNF703; ANKRD13D; TCEAL1; BARHL1; NAGS; PON1; RSF1; GDPD5; FCHSD2; RELT; TNRC18; CFL1; EGLN2; COL2A1; NUMA1; ARRB1; GLCE; RNF169; PELI3; MCC; ARHGEF17; ATG16L2; KDM4B; IGFBP5; NHS; ST6GALNAC5; ITPR2; GATA3; DRAP1; FAM169A; THAP1; F3; RBM4B;…
SP4	43	4345	34.4	1.20778	0.086798	1	0.544115	0.921925	PAK1; CYP4A22; FGFR3; MYO7A; KLC2; KIF12; CCND1; RGS8; GPC3; CCDC74B; NEU3; MUS81; FIBP; ZNF703; ANKRD13D; TCEAL1; NAGS; RSF1; FCHSD2; RELT; TNRC18; CFL1; EGLN2; NUMA1; GLCE; PELI3; ARHGEF17; ATG16L2; IGFBP5; NHS; GATA3; DRAP1; FAM169A; THAP1; RBM4B; RHOD; TLE3; JADE2; RAD9A; ARNTL; PHLDB2; WNK3; SART1;
TCF3	24	2140	19.2	1.36895	0.0658853	1	0.495889	0.840213	MYO7A; ADRA1B; KIF12; RAB1B; ITGB8; TMTC2; NR2E3; NAGS; FCHSD2; CFL1; ANK1; CDYL2; ATG16L2; IGFBP5; ST6GALNAC5; FAM169A; DOK6; RHOD; XRRA1; ARNTL; CHTOP; PHLDB2; ADGRG2; ACER3;
OTX1	4	848	3.2	0.576971	0.92233	1	1	1	CNTN3; LETM2; UPP2; SORCS1;
PITX1	4	848	3.2	0.576971	0.92233	1	1	1	CNTN3; LETM2; UPP2; SORCS1;
E2F1	12	1188	9.6	1.23348	0.267152	1	0.850028	1	TEX14; FGFR3; RAB6A; SF3B2; BARHL1; FCHSD2; NUMA1; GLCE; PTPRT; JADE2; ARNTL; NKX2-8;
EGR1	42	3215	33.6	1.59434	0.000755709	0.158699	0.0528996	0.0896309	PAK1; ATP2A3; KIF12; RGS8; LONRF2; GPC3; RAB1B; NEU3; NOVA1; MUS81; SF3B2; ITGB8; ZNF703; TCEAL1; BARHL1; RSF1; FCHSD2; TNRC18; CFL1; COL2A1; NUMA1; GLCE; MCC; ARHGEF17; CDYL2; IGFBP5; NHS; GATA3; DRAP1; F3; RBM4B; DOK6; ZNF281; TLE3; JADE2; SORCS1; RAD9A; TP53TG5; ARNTL; CHTOP; PHLDB2; WNK3;
NKX2-1	7	711	5.6	1.20297	0.365037	1	0.919808	1	ESRRB; RASSF6; RAB1B; PCDH20; TMTC2; JADE2; NKX2-8;
NRF1	15	2037	12	0.89908	0.711361	1	1	1	AQP11; BMP2K; RAB1B; ANKRD13D; FCHSD2; CFL1; EGLN2; DPY19L2; CTSF; DOK6; STXBP5; CCS; RBM4; WNK3; SART1;
BACH1	8	648	6.4	1.50821	0.162572	1	0.727714	1	RGS8; ITGB8; PON1; ANK1; ALB; F3; ARNTL; PHLDB2;
HOXB4	11	718	8.8	1.87097	0.0336848	1	0.416106	0.705033	ADRA1B; RGS8; NOVA1; PCDH20; MGAT4A; ITGB8; ADARB2; UPP2; DLGAP1; SORCS1; ARNTL;
MEIS2	5	527	4	1.15992	0.4345	1	0.991793	1	KLC2; SLC4A8; TMEM26; TMTC2; ARNTL;
NR4A2	7	1042	5.6	0.820837	0.758534	1	1	1	PAK1; SLC4A8; FCHSD2; PELI3; FAM169A; EIF1AD; KRBA2;
PPARA	2	370	1.6	0.662817	0.810451	1	1	1	PCDH20; FIBP;
PPARG	15	2016	12	0.908445	0.69585	1	1	1	MYO7A; RGS8; NOVA1; SF3B2; PON1; UPP2; RNF169; PELI3; ITPR2; GATA3; DRAP1; THAP1; RBM4B; DOK6; TP53TG5;
HSF1	10	806	8	1.51532	0.125087	1	0.645863	1	MYO7A; GP2; AFF3; LETM2; FAM168A; TMTC2; NR2E3; OR6B3; JADE2; ARNTL;
ETV7	7	1049	5.6	0.81536	0.764642	1	1	1	BMP2K; MGAT4A; FIBP; ADAM28; GATA3; SH3BP5L; SART1;
NR5A2	6	486	4.8	1.50883	0.208915	1	0.77601	1	INTS4; ANKRD13D; NAGS; ITPR2; DLGAP1; PHLDB2;
TEAD1	1	422	0.8	0.292018	0.970448	1	1	1	RHOD;
TFAP2A	2	258	1.6	0.95054	0.627645	1	1	1	ITPR2; PHLDB2;
ARNT	6	403	4.8	1.81957	0.113835	1	0.645863	1	CFL1; EGLN2; ADARB2; GLDN; RAD9A; WNK3;
BARX1	2	382	1.6	0.641996	0.824382	1	1	1	AFF3; ADARB2;
BSX	4	268	3.2	1.82559	0.177839	1	0.732279	1	KAT6A; ADARB2; RBM4; ACER3;
DMBX1	4	368	3.2	1.32952	0.356331	1	0.919808	1	FGFR3; CABP4; FCHSD2; CHTOP;
GSC	4	379	3.2	1.29094	0.376853	1	0.920223	1	PCDH20; CABP4; MCC; WNK3;
HNF4A	24	3015	19.2	0.97166	0.599236	1	1	1	AQP11; FGFR3; MYO7A; RASSF6; CCND1; RGS8; GPC3; LETM2; NOVA1; PCDH20; ZNF703; RSF1; UPP2; RNF169; PELI3; ARHGEF17; NHS; HAL; ALB; RBM4B; DOK6; JADE2; SORCS1; PHLDB2;
HOXA3	4	573	3.2	0.853872	0.695863	1	1	1	CCND1; TMTC2; TNRC18; UPP2;
HOXB3	5	335	4	1.8247	0.140982	1	0.683798	1	KAT6A; NOVA1; RANBP3L; ALB; STXBP5;
HOXD8	14	811	11.2	2.10777	0.00660154	1	0.215122	0.364493	AFP; COL28A1; AFF3; RASSF6; MGAT4A; ADARB2; UPP2; RAI2; ALB; DLGAP1; ZNF281; TLE3; JADE2; SORCS1;
ONECUT1	9	564	7.2	1.94917	0.0422963	1	0.424738	0.719658	SLC22A17; COL28A1; GPC3; NOVA1; TMEM26; RANBP3L; RAI2; PHLDB2; WNK3;
PAX7	4	467	3.2	1.04768	0.535343	1	1	1	ADARB2; FAM169A; DLGAP1; SORCS1;
POU4F3	8	687	6.4	1.42259	0.202001	1	0.77601	1	CCND1; NOVA1; UPP2; RNF169; RAI2; ALB; JADE2; SORCS1;
PRRX2	7	597	5.6	1.43267	0.218378	1	0.777276	1	RGS8; TMEM26; ADARB2; UPP2; ALB; DLGAP1; SORCS1;
VAX2	7	434	5.6	1.97074	0.0661185	1	0.495889	0.840213	AFF3; GPC3; TMTC2; ADARB2; DLGAP1; TLE3; SORCS1;
VSX2	6	595	4.8	1.23243	0.361728	1	0.919808	1	AFF3; TMTC2; UPP2; ARRB1; FAM169A; TLE3;
CUX1	2	350	1.6	0.700691	0.785059	1	1	1	GPC3; GLCE;
CACD	6	514	4.8	1.42664	0.246058	1	0.833422	1	ESRRB; BMP2K; IGFBP5; F3; JADE2; GOLGA7;
HOXB13	4	526	3.2	0.930168	0.629837	1	1	1	ITGB8; TMEM26; TNRC18; RBM4;
ZNF238	12	799	9.6	1.83401	0.0309106	1	0.416106	0.705033	KAT6A; ATP2A3; MGAT4A; TMEM26; PON1; COL2A1; CDYL2; ALB; JADE2; FAM110B; NKX2-8; PHLDB2;
ZNF513	12	799	9.6	1.83401	0.0309106	1	0.416106	0.705033	KAT6A; ATP2A3; MGAT4A; TMEM26; PON1; COL2A1; CDYL2; ALB; JADE2; FAM110B; NKX2-8; PHLDB2;
MYC	7	1086	5.6	0.787581	0.795098	1	1	1	FCHSD2; CFL1; EGLN2; DRAP1; RNF128; RAD9A; ARMT1;
MYF5	24	1856	19.2	1.57842	0.0152214	1	0.29059	0.492364	RAB6A; MYO7A; RAB1B; NOVA1; SLC4A8; BARHL1; FCHSD2; CFL1; ARRB1; ANK1; PELI3; CDYL2; ATG16L2; RAI2; IGFBP5; ST6GALNAC5; ITPR2; RNF128; PTPRT; JADE2; CHTOP; PHLDB2; ADGRG2; ACER3;
FOXD1	5	334	4	1.83016	0.139737	1	0.683798	1	TNRC18; COL2A1; MCC; RANBP3L; CHTOP;
POU6F1	8	655	6.4	1.49209	0.169362	1	0.732279	1	RAB6A; NOVA1; RELT; ST6GALNAC5; GATA3; STXBP5; JADE2; PHLDB2;
ASCL2	21	1499	16.8	1.71014	0.0101129	1	0.235968	0.399814	RAB6A; MYO7A; ADRA1B; CNTN3; RGS8; RAB1B; NOVA1; SLC4A8; ITGB8; TMEM26; PON1; ADARB2; ANK1; MCC; RAI2; STXBP5; JADE2; ARNTL; CHTOP; GOLGA7; PHLDB2;
BARHL1	4	509	3.2	0.961233	0.603867	1	1	1	CCND1; TNRC18; ADARB2; TLE3;
ESRRA	8	917	6.4	1.06578	0.480155	1	1	1	PAK1; SLC22A17; CNTN3; KIF12; ADARB2; UPP2; ARNTL; PHLDB2;
GBX1	1	199	0.8	0.619238	0.807626	1	1	1	DLGAP1;
GBX2	2	302	1.6	0.812055	0.711841	1	1	1	KAT6A; TMEM26;
LHX4	7	392	5.6	2.18188	0.0424738	1	0.424738	0.719658	KAT6A; GPC3; TMEM26; UPP2; ALB; TLE3; RBM4;
POU3F4	7	366	5.6	2.33688	0.0310549	1	0.416106	0.705033	NOVA1; BARHL1; ADARB2; UPP2; ST6GALNAC5; SORCS1; ARNTL;
TCF12	11	1099	8.8	1.22235	0.28969	1	0.885276	1	RAB6A; ATP2A3; BMP2K; PON1; RANBP3L; GLDN; DLGAP1; STXBP5; JADE2; FAM110B; PHLDB2;
ELF2	2	780	1.6	0.314417	0.989278	1	1	1	KIF12; GOLGA7;
ESR1	4	696	3.2	0.702975	0.827939	1	1	1	RGS8; ITGB8; KDM4B; ULK2;
FOS	10	1754	8	0.696326	0.921061	1	1	1	KAT6A; ADRA1B; RGS8; BMP2K; ADARB2; ST6GALNAC5; GATA3; F3; STXBP5; ARNTL;
FOSB	10	1754	8	0.696326	0.921061	1	1	1	KAT6A; ADRA1B; RGS8; BMP2K; ADARB2; ST6GALNAC5; GATA3; F3; STXBP5; ARNTL;
JUN	10	1754	8	0.696326	0.921061	1	1	1	KAT6A; ADRA1B; RGS8; BMP2K; ADARB2; ST6GALNAC5; GATA3; F3; STXBP5; ARNTL;
JUNB	10	1754	8	0.696326	0.921061	1	1	1	KAT6A; ADRA1B; RGS8; BMP2K; ADARB2; ST6GALNAC5; GATA3; F3; STXBP5; ARNTL;
JUND	10	1754	8	0.696326	0.921061	1	1	1	KAT6A; ADRA1B; RGS8; BMP2K; ADARB2; ST6GALNAC5; GATA3; F3; STXBP5; ARNTL;
NR6A1	3	769	2.4	0.477579	0.954775	1	1	1	AFP; INTS4; FCHSD2;
RAB40B	5	806	4	0.758417	0.796555	1	1	1	CNTN3; UPP2; PELI3; DOK6; ADGRG2;
RARA	5	806	4	0.758417	0.796555	1	1	1	CNTN3; UPP2; PELI3; DOK6; ADGRG2;
SPI1	8	814	6.4	1.20064	0.350735	1	0.919808	1	RGS8; RAB1B; PCDH20; NUMA1; ATG16L2; ITPR2; RNF128; EIF1AD;
BARX2	4	296	3.2	1.65291	0.22496	1	0.787361	1	TNRC18; ADARB2; UPP2; DLGAP1;
DBX2	7	408	5.6	2.09632	0.0507057	1	0.462965	0.784428	NOVA1; MGAT4A; ADARB2; UPP2; RAI2; TLE3; SORCS1;
EN1	4	466	3.2	1.04993	0.533641	1	1	1	AFF3; CCND1; UPP2; SORCS1;
FOXC1	4	301	3.2	1.62545	0.233705	1	0.804558	1	RGS8; PON1; DLGAP1; JADE2;
HOXA5	8	916	6.4	1.06695	0.478911	1	1	1	KAT6A; AFF3; RGS8; TMEM26; FCHSD2; DLGAP1; ZNF281; NKX2-8;
HOXA7	6	527	4.8	1.39145	0.263938	1	0.850028	1	AFP; RGS8; NOVA1; PCDH20; MGAT4A; UPP2;
HOXB7	6	388	4.8	1.88992	0.0996037	1	0.597622	1	AFP; ADARB2; UPP2; RAI2; RNF128; SORCS1;
HOXB8	3	225	2.4	1.63221	0.28065	1	0.87965	1	ADARB2; UPP2; JADE2;
HOXC6	6	237	4.8	3.09399	0.0133885	1	0.281159	0.476384	RGS8; TMEM26; ADARB2; UPP2; SORCS1; ARNTL;
ISX	2	265	1.6	0.925432	0.642205	1	1	1	AFF3; DLGAP1;
LHX8	1	223	0.8	0.552596	0.842539	1	1	1	TMEM26;
MNX1	1	311	0.8	0.39624	0.924653	1	1	1	RAI2;
MSX1	4	234	3.2	2.09084	0.126097	1	0.645863	1	RASSF6; UPP2; TLE3; SORCS1;
NKX1-1	1	146	0.8	0.844014	0.700963	1	1	1	COL28A1;
PAX6	5	557	4	1.09745	0.48252	1	1	1	GPC3; NOVA1; UPP2; SORCS1; ARNTL;
PBX1	9	741	7.2	1.48358	0.154351	1	0.720305	1	COL28A1; KIF12; BMP2K; LETM2; TMTC2; PON1; COL2A1; WNK3; ADGRG2;
PKNOX1	1	95	0.8	1.29707	0.543502	1	1	1	KIF12;
POU5F1	3	373	2.4	0.984593	0.593231	1	1	1	NHS; ARNTL; PHLDB2;
PRRX1	3	389	2.4	0.944097	0.621798	1	1	1	ADARB2; UPP2; ALB;
REST	4	765	3.2	0.63957	0.878735	1	1	1	ATP2A3; RAB1B; BARHL1; RSF1;
SOX1	3	276	2.4	1.33062	0.394722	1	0.931367	1	ITGB8; RELT; NHS;
TGIF1	9	1034	7.2	1.06319	0.475795	1	1	1	KAT6A; COL28A1; TMEM26; TMTC2; RANBP3L; HAL; STXBP5; TLE3; ARNTL;
CRX	7	349	5.6	2.4507	0.0248334	1	0.416106	0.705033	MYO7A; COL28A1; PCDH20; CABP4; ADARB2; FAM169A; TLE3;
ESR2	3	464	2.4	0.791498	0.737183	1	1	1	MGAT4A; ITGB8; KDM4B;
GLI1	4	148	3.2	3.30571	0.0334835	1	0.416106	0.705033	ADRA1B; RSF1; KDM4B; NKX2-8;
HENMT1	10	1144	8	1.06762	0.463955	1	1	1	MYO7A; ATP2A3; CNTN3; RGS8; ITGB8; ANK1; MCC; PTPRT; STXBP5; PHLDB2;
INSM1	3	487	2.4	0.754118	0.766515	1	1	1	KIF12; NAGS; NUMA1;
NHLH1	10	1144	8	1.06762	0.463955	1	1	1	MYO7A; ATP2A3; CNTN3; RGS8; ITGB8; ANK1; MCC; PTPRT; STXBP5; PHLDB2;
ZEB1	1	401	0.8	0.30731	0.964705	1	1	1	FAM169A;
ZFP161	8	1137	6.4	0.859566	0.7228	1	1	1	HMGCLL1; FCHSD2; TNRC18; CFL1; PELI3; TLE3; PHLDB2; WNK3;
BACH2	5	628	4	0.973379	0.58973	1	1	1	ANK1; F3; GLDN; ARNTL; PHLDB2;
EBF1	4	205	3.2	2.3866	0.0880948	1	0.544115	0.921925	RAB6A; AFF3; SF3B2; RNF128;
HOXA13	1	309	0.8	0.398804	0.923377	1	1	1	MCC;
MSX2	6	344	4.8	2.13164	0.0637982	1	0.495889	0.840213	KAT6A; GPC3; RELT; DLGAP1; TLE3; SORCS1;
NOBOX	5	621	4	0.984351	0.579677	1	1	1	AFF3; CCND1; GPC3; TNRC18; RNF128;
TFAP4	12	1280	9.6	1.14483	0.356989	1	0.919808	1	RAB6A; MYO7A; RGS8; NOVA1; TMEM26; ANK1; PELI3; RAI2; STXBP5; TP53TG5; CHTOP; PHLDB2;
ATF3	10	800	8	1.52669	0.120773	1	0.645863	1	PAK1; MYO7A; CYP4X1; ADRA1B; LETM2; BARHL1; ANK1; RANBP3L; TLE3; TP53TG5;
TAL1	11	1113	8.8	1.20698	0.303851	1	0.886233	1	MYO7A; SF3B2; TMTC2; PON1; ADARB2; ANK1; STXBP5; SORCS1; CHTOP; GOLGA7; PHLDB2;
HOXA9	7	729	5.6	1.17326	0.389373	1	0.93126	1	COL28A1; GPC3; PCDH20; TMEM26; ADARB2; DLGAP1; JADE2;
NFE2	4	518	3.2	0.944533	0.61775	1	1	1	AFF3; FCHSD2; ST6GALNAC5; WNK3;
LMO2	14	610	11.2	2.80228	0.000472633	0.099253	0.0496265	0.084085	ATP2A3; NOVA1; MUS81; SLC4A8; ITGB8; BARHL1; CFL1; ANK1; IGFBP5; ST6GALNAC5; FAM169A; PTPRT; TP53TG5; GOLGA7;
RUNX2	1	315	0.8	0.391208	0.927143	1	1	1	BMP2K;
GATA1	9	728	7.2	1.51007	0.143272	1	0.683798	1	ESRRB; ITGB8; CABP4; GLCE; RANBP3L; IGFBP5; ST6GALNAC5; TLE3; PHLDB2;
FOXD3	5	361	4	1.69328	0.174984	1	0.732279	1	AFF3; RGS8; LETM2; NOVA1; PHLDB2;
ISL2	3	515	2.4	0.713118	0.798608	1	1	1	RAI2; ST6GALNAC5; SORCS1;
ZNF143	4	618	3.2	0.791698	0.750903	1	1	1	KLC2; RAB1B; FAM168A; SF3B2;
CDX2	1	253	0.8	0.487073	0.877466	1	1	1	AFF3;
FOXO1	3	192	2.4	1.91273	0.208638	1	0.77601	1	PON1; JADE2; TP53TG5;
GFI1	4	552	3.2	0.886356	0.667431	1	1	1	CCND1; TMTC2; TNRC18; MOV10L1;
PAX4	2	175	1.6	1.40134	0.42135	1	0.98315	1	RAB6A; TMEM26;
PDX1	6	372	4.8	1.9712	0.0855427	1	0.544115	0.921925	ADARB2; KDM4B; FFAR1; RBM4B; GLDN; RHOD;
EOMES	2	291	1.6	0.84275	0.6924	1	1	1	AFF3; ARNTL;
POU3F3	2	59	1.6	4.15605	0.0843041	1	0.544115	0.921925	TMTC2; CHTOP;
T	2	46	1.6	5.33034	0.0545743	1	0.477525	0.809099	ITGB8; PHLDB2;
TBX5	2	204	1.6	1.20214	0.500225	1	1	1	ST6GALNAC5; PHLDB2;
ATF6	2	195	1.6	1.25762	0.476465	1	1	1	SLC22A17; ADRA1B;
STRA13	5	574	4	1.06495	0.509143	1	1	1	KAT6A; TCEAL1; EGLN2; RAD9A; WNK3;
ZIC1	6	548	4.8	1.33813	0.293504	1	0.885276	1	MGAT4A; BARHL1; FCHSD2; RAI2; JADE2; NKX2-8;
DBX1	3	239	2.4	1.5366	0.311968	1	0.897441	1	ADRA1B; NOVA1; ADARB2;
FOXJ2	2	299	1.6	0.820203	0.706642	1	1	1	NOVA1; ADARB2;
ELF1	7	585	5.6	1.46206	0.204315	1	0.77601	1	ATP2A3; TNRC18; ARRB1; MCC; ATG16L2; ITPR2; DLGAP1;
E4F1	2	158	1.6	1.55211	0.372303	1	0.919808	1	RAB6A; TLE3;
ITGAL	1	178	0.8	0.69229	0.770841	1	1	1	MYO7A;
ESX1	4	266	3.2	1.83932	0.174613	1	0.732279	1	NOVA1; ADARB2; SORCS1; ARNTL;
TLX2	1	60	0.8	2.05357	0.390242	1	0.93126	1	TNRC18;
DLX5	2	220	1.6	1.11472	0.540738	1	1	1	CCND1; ACER3;
ATF4	5	315	4	1.94055	0.117055	1	0.645863	1	PAK1; MGAT4A; ATG16L2; NHS; TLE3;
ELF3	1	437	0.8	0.281995	0.973973	1	1	1	ATG16L2;
SPDEF	1	189	0.8	0.652	0.790904	1	1	1	RAB1B;
PAX5	5	149	4	4.10235	0.00763924	1	0.215122	0.364493	RAB1B; ITGB8; HMGCLL1; RSF1; JADE2;
RBPJ	2	235	1.6	1.04357	0.57663	1	1	1	FCHSD2; TLE3;
CEBPD	1	113	0.8	1.09047	0.606749	1	1	1	SORCS1;
MAFK	1	128	0.8	0.962694	0.652755	1	1	1	SORCS1;
ALX1	1	56	0.8	2.20022	0.369759	1	0.919808	1	ADARB2;
POU1F1	1	1	0.8	122.014	0.00819511	1	0.215122	0.364493	TMTC2;

## Sheet: Clinical phenotype
Clinical phenotype of Co-expressed genes with CHRNA6
Analysis: Clinical phenotype
Dataset name: CHRNA6 Co-expressed2
Number of genes in the dataset: 145
Number of genes in the dataset (which are available in Clinical phenotype database) :15
Number of genes in background: 1820
Is analysis quantitative: No
						Corrected p-values
Clinical phenotype	No. of genes in the dataset	No. of genes in the background dataset	Percentage of genes	Fold enrichment	P-value (Hypergeometric test)	Bonferroni method	BH method	Q-value (Storey-Tibshirani method)	genes mapped (from input data set)
Abdomen	6	621	40	1.17346	0.406877	1	1	1	CCND1; GPC3; BBS1; NAGS; COL2A1; ANK1;
Abnormal cartilage collagen on EM	1	1	6.66667	121.253	0.00824176	1	0.687456	1	COL2A1;
Abnormal gait	1	9	6.66667	13.5922	0.07193	1	1	1	COL2A1;
Absent parotid gland	1	3	6.66667	40.6863	0.0245354	1	1	1	FGFR3;
Absent pubic ossification in infancy	1	1	6.66667	121.253	0.00824176	1	0.687456	1	COL2A1;
Absent-small capital femoral epiphyses (infancy-early childhood)	1	2	6.66667	60.9282	0.0164201	1	1	1	COL2A1;
Absent Stensen duct	1	3	6.66667	40.6863	0.0245354	1	1	1	FGFR3;
Absent styloid processes	1	1	6.66667	121.253	0.00824176	1	0.687456	1	COL2A1;
Absent talus and calcaneal ossification in infancy	1	1	6.66667	121.253	0.00824176	1	0.687456	1	COL2A1;
Absent vertebral body mineralization	1	1	6.66667	121.253	0.00824176	1	0.687456	1	COL2A1;
Absent vestibular function (caloric test)	1	1	6.66667	121.253	0.00824176	1	0.687456	1	MYO7A;
Acetabular spurs (infancy)	1	1	6.66667	121.253	0.00824176	1	0.687456	1	COL2A1;
Adenocarcinoma of ampulla of Vater	1	2	6.66667	60.9282	0.0164201	1	1	1	CCND1;
Adrenal hemangiomas	1	2	6.66667	60.9282	0.0164201	1	1	1	CCND1;
Advanced bone age	1	9	6.66667	13.5922	0.07193	1	1	1	GPC3;
Agenesis of corpus callosum	1	16	6.66667	7.64933	0.124505	1	1	1	GPC3;
Aggressive behavior	1	20	6.66667	6.12022	0.153286	1	1	1	NAGS;
Airways	2	66	13.3333	3.69215	0.100423	1	1	1	FGFR3; COL2A1;
Alacrima (dry eye syndrome)	1	3	6.66667	40.6863	0.0245354	1	1	1	FGFR3;
Allelic disorder to autosomal dominant nonsyndromic sensorineural deafness (DFNA11,	1	1	6.66667	121.253	0.00824176	1	0.687456	1	MYO7A;
Allelic disorder to autosomal recessive hearing loss (DFNB2,	1	1	6.66667	121.253	0.00824176	1	0.687456	1	MYO7A;
Allelic to Stickler syndrome, type 3 (	1	2	6.66667	60.9282	0.0164201	1	1	1	COL2A1;
Amniotic Fluid	2	68	13.3333	3.58357	0.10565	1	1	1	FGFR3; COL2A1;
Anteriorly splayed ribs	1	1	6.66667	121.253	0.00824176	1	0.687456	1	COL2A1;
Anterior vertebral wedging (childhood)	1	2	6.66667	60.9282	0.0164201	1	1	1	COL2A1;
Anterior wedging	1	1	6.66667	121.253	0.00824176	1	0.687456	1	COL2A1;
Anteverted nares	1	36	6.66667	3.40088	0.259809	1	1	1	COL2A1;
Aplastic/hypoplastic lacrimal glands	1	3	6.66667	40.6863	0.0245354	1	1	1	FGFR3;
Aplastic/hypoplastic lacrimal puncta	1	3	6.66667	40.6863	0.0245354	1	1	1	FGFR3;
Arachnodactyly	1	16	6.66667	7.64933	0.124505	1	1	1	COL2A1;
Arthropathy	1	5	6.66667	24.4443	0.040579	1	1	1	COL2A1;
Associated with several congenital malformation syndromes (WAGR	1	3	6.66667	40.6863	0.0245354	1	1	1	GPC3;
Associated with several loci on chromosomes 11p15 (WT2,	1	3	6.66667	40.6863	0.0245354	1	1	1	GPC3;
Asteroid hyalosis	1	1	6.66667	121.253	0.00824176	1	0.687456	1	COL2A1;
Ataxia	1	130	6.66667	0.941971	0.672439	1	1	1	BBS1;
Audiogram is gently sloping or flat	1	1	6.66667	121.253	0.00824176	1	0.687456	1	MYO7A;
Audiogram may be ascending	1	1	6.66667	121.253	0.00824176	1	0.687456	1	MYO7A;
Autism	1	5	6.66667	24.4443	0.040579	1	1	1	NHS;
Autosomal dominant (11p)	1	5	6.66667	24.4443	0.040579	1	1	1	FGFR3;
Autosomal dominant	9	747	60	1.46249	0.109238	1	1	1	FGFR3; MYO7A; CCND1; GPC3; COL2A1; ANK1; GATA3; ALB; THAP1;
Autosomal dominantly acting oncogene plus loss of suppressor gene(s)	3	25	20	14.593	0.000935186	1	0.687456	1	FGFR3; CCND1; MCC;
Autosomal dominant vs. multifactorial	1	14	6.66667	8.74131	0.109774	1	1	1	COL2A1;
Autosomal dominant with complete penetrance	1	1	6.66667	121.253	0.00824176	1	0.687456	1	FGFR3;
Autosomal recessive	6	924	40	0.788662	0.863788	1	1	1	MYO7A; BBS1; NR2E3; NAGS; COL2A1; HAL;
Autosomal recessive inheritance can occur	1	1	6.66667	121.253	0.00824176	1	0.687456	1	ANK1;
Average age at onset 19 years (range 5 to 38)	1	1	6.66667	121.253	0.00824176	1	0.687456	1	THAP1;
Azoospermia/oligospermia (present at diagnosis)	1	3	6.66667	40.6863	0.0245354	1	1	1	FGFR3;
Barrel chest	1	3	6.66667	40.6863	0.0245354	1	1	1	COL2A1;
Barrel-shaped chest	1	5	6.66667	24.4443	0.040579	1	1	1	COL2A1;
Based on 4 patients in one family	1	1	6.66667	121.253	0.00824176	1	0.687456	1	COL2A1;
Behavioral disorders (rare)	1	1	6.66667	121.253	0.00824176	1	0.687456	1	HAL;
Behavioral disturbances	1	2	6.66667	60.9282	0.0164201	1	1	1	NHS;
Behavioral Psychiatric Manifestations	3	200	20	1.82477	0.222819	1	1	1	NAGS; NHS; HAL;
Biconcave disc (fish-mouth vertebrae)	1	1	6.66667	121.253	0.00824176	1	0.687456	1	COL2A1;
Bifid thumb	1	5	6.66667	24.4443	0.040579	1	1	1	FGFR3;
Bilateral congenital cataracts (males)	1	1	6.66667	121.253	0.00824176	1	0.687456	1	NHS;
Bilateral papillary cystadenoma of the epididymis	1	2	6.66667	60.9282	0.0164201	1	1	1	CCND1;
Bilateral papillary cystadenomas of the broad ligament	1	2	6.66667	60.9282	0.0164201	1	1	1	CCND1;
Biliary Tract	1	30	6.66667	4.08083	0.221421	1	1	1	ANK1;
Birth head circumference greater than 97th percentile	1	1	6.66667	121.253	0.00824176	1	0.687456	1	GPC3;
Birth length greater than 97th percentile	1	2	6.66667	60.9282	0.0164201	1	1	1	GPC3;
Birth rate of 7.6 per 1,000,000	1	1	6.66667	121.253	0.00824176	1	0.687456	1	FGFR3;
Birth weight greater than 97th percentile	1	1	6.66667	121.253	0.00824176	1	0.687456	1	GPC3;
BLADDER CANCER	1	5	6.66667	24.4443	0.040579	1	1	1	FGFR3;
Blindness	1	41	6.66667	2.98624	0.290442	1	1	1	COL2A1;
Bowing of legs	1	1	6.66667	121.253	0.00824176	1	0.687456	1	FGFR3;
Bowleg	1	1	6.66667	121.253	0.00824176	1	0.687456	1	FGFR3;
Brachycephaly	1	37	6.66667	3.30899	0.266033	1	1	1	FGFR3;
Brachydactyly	3	64	20	5.7018	0.0139479	1	1	1	FGFR3; BBS1; COL2A1;
Brachydactyly E-like changes	1	1	6.66667	121.253	0.00824176	1	0.687456	1	COL2A1;
Brain stem compression	1	3	6.66667	40.6863	0.0245354	1	1	1	FGFR3;
Breasts	1	55	6.66667	2.22624	0.370037	1	1	1	GPC3;
Broad fingers	1	1	6.66667	121.253	0.00824176	1	0.687456	1	NHS;
Broad flat nasal bridge	1	2	6.66667	60.9282	0.0164201	1	1	1	GPC3;
Broad forehead	1	19	6.66667	6.44217	0.146174	1	1	1	FGFR3;
Broad halluces	1	7	6.66667	17.4701	0.056376	1	1	1	FGFR3;
Broad hands	1	5	6.66667	24.4443	0.040579	1	1	1	COL2A1;
Broad secondary alveolar ridge	1	2	6.66667	60.9282	0.0164201	1	1	1	GPC3;
Broad, thimble-like middle phalanges	1	1	6.66667	121.253	0.00824176	1	0.687456	1	FGFR3;
Broad thumbs	1	7	6.66667	17.4701	0.056376	1	1	1	GPC3;
Broad toes	1	2	6.66667	60.9282	0.0164201	1	1	1	GPC3;
Bulbous nasal tip	1	9	6.66667	13.5922	0.07193	1	1	1	COL2A1;
Bulging of temporal fossae	1	1	6.66667	121.253	0.00824176	1	0.687456	1	FGFR3;
C1-C2 subluxation	1	2	6.66667	60.9282	0.0164201	1	1	1	COL2A1;
Calcaneocuboidal fusions	1	1	6.66667	121.253	0.00824176	1	0.687456	1	FGFR3;
Can be effectively treated with N-carbamylglutamate	1	1	6.66667	121.253	0.00824176	1	0.687456	1	NAGS;
Capitate-hamate fusions	1	1	6.66667	121.253	0.00824176	1	0.687456	1	FGFR3;
Cardiac conduction defects	1	5	6.66667	24.4443	0.040579	1	1	1	GPC3;
Cardiomyopathy	1	21	6.66667	5.82892	0.160342	1	1	1	GPC3;
Cardiovascular	3	446	20	0.818305	0.751393	1	1	1	GPC3; BBS1; COL2A1;
Cataracts	2	49	13.3333	4.97284	0.0596557	1	1	1	BBS1; COL2A1;
Cataracts, crenated	1	1	6.66667	121.253	0.00824176	1	0.687456	1	COL2A1;
Central Nervous System	10	887	66.6667	1.36835	0.127891	1	1	1	FGFR3; MYO7A; CCND1; GPC3; BBS1; NAGS; COL2A1; NHS; HAL; THAP1;
Cerebellar hemangioblastoma	1	2	6.66667	60.9282	0.0164201	1	1	1	CCND1;
Cerebellar vermis hypoplasia	1	9	6.66667	13.5922	0.07193	1	1	1	GPC3;
Cervical myelopathy	1	6	6.66667	20.377	0.0485081	1	1	1	COL2A1;
Cervical ribs	1	2	6.66667	60.9282	0.0164201	1	1	1	GPC3;
Chest	3	243	20	1.50188	0.323501	1	1	1	FGFR3; GPC3; COL2A1;
Cleft palate	2	97	13.3333	2.51231	0.188508	1	1	1	GPC3; COL2A1;
Clinical manifestation of some forms of Bardet-Biedl syndrome requires recessive mutation in 1 of the 6 loci plus an additional mutation in a second locus	1	19	6.66667	6.44217	0.146174	1	1	1	BBS1;
Clinodactyly, 3,5 finger	1	3	6.66667	40.6863	0.0245354	1	1	1	FGFR3;
Clinodactyly	1	39	6.66667	3.13934	0.278334	1	1	1	FGFR3;
Clover leaf head	1	1	6.66667	121.253	0.00824176	1	0.687456	1	FGFR3;
Cloverleaf skull rarely	1	1	6.66667	121.253	0.00824176	1	0.687456	1	FGFR3;
Clubfoot	1	13	6.66667	9.4132	0.102323	1	1	1	GPC3;
Club-shaped proximal femurs (infancy)	1	1	6.66667	121.253	0.00824176	1	0.687456	1	COL2A1;
Coarse facies	2	28	13.3333	8.70114	0.0211828	1	1	1	GPC3; COL2A1;
Coccygeal defects	1	1	6.66667	121.253	0.00824176	1	0.687456	1	GPC3;
Coccygeal skin tags	1	1	6.66667	121.253	0.00824176	1	0.687456	1	GPC3;
Coma	1	48	6.66667	2.55084	0.331344	1	1	1	NAGS;
Conductive hearing loss	2	22	13.3333	11.0731	0.0133198	1	1	1	FGFR3; COL2A1;
Coned epiphyses	1	1	6.66667	121.253	0.00824176	1	0.687456	1	FGFR3;
Cone-shaped epiphyses	1	8	6.66667	15.2891	0.0641831	1	1	1	COL2A1;
Confusion	1	10	6.66667	12.2343	0.0796169	1	1	1	NAGS;
Congenital heart defects	1	22	6.66667	5.56409	0.167343	1	1	1	BBS1;
Congenital nuclear cataract in males	1	1	6.66667	121.253	0.00824176	1	0.687456	1	NHS;
Congenital spinal stenosis due to short pedicles, especially lumbar	1	1	6.66667	121.253	0.00824176	1	0.687456	1	FGFR3;
Corneal perforation	1	3	6.66667	40.6863	0.0245354	1	1	1	FGFR3;
Corneal sensitivity impairment (hypesthesia)	1	3	6.66667	40.6863	0.0245354	1	1	1	FGFR3;
Coronal craniosynostosis (unicoronal or bicoronal, unilateral or bilateral)	1	1	6.66667	121.253	0.00824176	1	0.687456	1	FGFR3;
Coronal hypospadias	1	3	6.66667	40.6863	0.0245354	1	1	1	FGFR3;
Coronal vertebral clefts	1	1	6.66667	121.253	0.00824176	1	0.687456	1	COL2A1;
Coxa valga deformity	1	1	6.66667	121.253	0.00824176	1	0.687456	1	COL2A1;
Coxa vara	1	16	6.66667	7.64933	0.124505	1	1	1	COL2A1;
Cranial dystonia	1	1	6.66667	121.253	0.00824176	1	0.687456	1	THAP1;
Cryptorchidism	1	101	6.66667	1.21241	0.57676	1	1	1	GPC3;
Cystic hygroma	1	5	6.66667	24.4443	0.040579	1	1	1	COL2A1;
Cystic kidneys	1	3	6.66667	40.6863	0.0245354	1	1	1	GPC3;
Dacryocystitis	1	4	6.66667	30.5401	0.0325882	1	1	1	FGFR3;
Dappled metaphyses (proximal femora, proximal humeri, distal radii, distal ulnae, and proximal and distal tibiae and fibulae)	1	1	6.66667	121.253	0.00824176	1	0.687456	1	COL2A1;
Dappling greater in ulna than radius and fibula greater than tibia	1	1	6.66667	121.253	0.00824176	1	0.687456	1	COL2A1;
Deafness, conductive	1	1	6.66667	121.253	0.00824176	1	0.687456	1	COL2A1;
Deafness, sensorineural	1	9	6.66667	13.5922	0.07193	1	1	1	GATA3;
Death in majority of infants soon after birth	1	1	6.66667	121.253	0.00824176	1	0.687456	1	FGFR3;
Decreased cranial base ossification	1	1	6.66667	121.253	0.00824176	1	0.687456	1	COL2A1;
Decreased fetal activity	1	6	6.66667	20.377	0.0485081	1	1	1	FGFR3;
Decreased height compared to unaffected siblings	1	1	6.66667	121.253	0.00824176	1	0.687456	1	COL2A1;
Decreased histidase activity	1	1	6.66667	121.253	0.00824176	1	0.687456	1	HAL;
Decreased or absent histidase activity	1	1	6.66667	121.253	0.00824176	1	0.687456	1	HAL;
Decreased or absent serum citrulline	1	1	6.66667	121.253	0.00824176	1	0.687456	1	NAGS;
Decreased urocanic acid in blood, urine, and skin cells	1	1	6.66667	121.253	0.00824176	1	0.687456	1	HAL;
Decreased urocanic acid in stratum corneum	1	1	6.66667	121.253	0.00824176	1	0.687456	1	HAL;
Delayed epiphyseal ossification (early)	1	1	6.66667	121.253	0.00824176	1	0.687456	1	COL2A1;
Delayed eruption of primary teeth	1	3	6.66667	40.6863	0.0245354	1	1	1	FGFR3;
Delayed motor development	2	55	13.3333	4.43045	0.0732245	1	1	1	FGFR3; MYO7A;
Delayed motor milestones	1	10	6.66667	12.2343	0.0796169	1	1	1	COL2A1;
Delayed pubic bone ossification	1	1	6.66667	121.253	0.00824176	1	0.687456	1	COL2A1;
Delivery	1	43	6.66667	2.84738	0.302361	1	1	1	COL2A1;
Dental caries, severe	1	4	6.66667	30.5401	0.0325882	1	1	1	FGFR3;
Dental crowding	1	29	6.66667	4.2215	0.214846	1	1	1	BBS1;
Dental malocclusion	1	7	6.66667	17.4701	0.056376	1	1	1	GPC3;
Depressed nasal bridge	1	38	6.66667	3.22193	0.272208	1	1	1	COL2A1;
Developmental delay	2	141	13.3333	1.72838	0.326013	1	1	1	FGFR3; BBS1;
Development varies from normal to retarded	1	1	6.66667	121.253	0.00824176	1	0.687456	1	GPC3;
Diaphragm	1	20	6.66667	6.12022	0.153286	1	1	1	GPC3;
Diaphragmatic hernia	1	10	6.66667	12.2343	0.0796169	1	1	1	GPC3;
Diastasis recti	1	9	6.66667	13.5922	0.07193	1	1	1	GPC3;
Diastema (males and females)	1	1	6.66667	121.253	0.00824176	1	0.687456	1	NHS;
Digenic recessive	1	24	6.66667	5.10061	0.181182	1	1	1	BBS1;
Digitalized thumb	1	3	6.66667	40.6863	0.0245354	1	1	1	FGFR3;
Diminished joint mobility at elbows, knees, and hips	1	1	6.66667	121.253	0.00824176	1	0.687456	1	COL2A1;
Disc-like vertebral bodies	1	1	6.66667	121.253	0.00824176	1	0.687456	1	COL2A1;
Dislocation of hip	1	2	6.66667	60.9282	0.0164201	1	1	1	COL2A1;
Distal phalangeal hypoplasia	1	5	6.66667	24.4443	0.040579	1	1	1	GPC3;
Distended abdomen	1	4	6.66667	30.5401	0.0325882	1	1	1	COL2A1;
Downslanting palpebral fissures	2	57	13.3333	4.27502	0.0779583	1	1	1	FGFR3; GPC3;
Dry mouth	1	5	6.66667	24.4443	0.040579	1	1	1	FGFR3;
Dumbbell-shaped femurs (newborn)	1	2	6.66667	60.9282	0.0164201	1	1	1	COL2A1;
Duplication of renal pelvis	1	1	6.66667	121.253	0.00824176	1	0.687456	1	GPC3;
Dwarfism, lethal micromelic	1	1	6.66667	121.253	0.00824176	1	0.687456	1	FGFR3;
Dwarfism, marked micromelic	1	2	6.66667	60.9282	0.0164201	1	1	1	COL2A1;
Dwarfism, neonatal short-limbed	1	1	6.66667	121.253	0.00824176	1	0.687456	1	COL2A1;
Dwarfism, short-trunk, identifiable at birth	1	1	6.66667	121.253	0.00824176	1	0.687456	1	COL2A1;
Dwarfism, short-trunk, short-limbed	1	1	6.66667	121.253	0.00824176	1	0.687456	1	COL2A1;
Dysarthria	1	118	6.66667	1.03776	0.635602	1	1	1	THAP1;
Dysphonia	1	6	6.66667	20.377	0.0485081	1	1	1	THAP1;
Dysplastic ilium	1	1	6.66667	121.253	0.00824176	1	0.687456	1	FGFR3;
Dystonia, trunk and limbs (upper and lower)	1	1	6.66667	121.253	0.00824176	1	0.687456	1	THAP1;
Dystonia, upper and lower limbs	1	1	6.66667	121.253	0.00824176	1	0.687456	1	THAP1;
Early onset patients are indistinguishable from those with carbamoyl phosphate synthetase I (CPS1) deficiency (	1	1	6.66667	121.253	0.00824176	1	0.687456	1	NAGS;
Ears	7	442	46.6667	1.923	0.0484119	1	1	1	FGFR3; MYO7A; CCND1; GPC3; COL2A1; NHS; GATA3;
Elevated AFP (endodermal sinus tumor)	1	3	6.66667	40.6863	0.0245354	1	1	1	FGFR3;
Elevated hCG (choriocarcinoma)	1	3	6.66667	40.6863	0.0245354	1	1	1	FGFR3;
Elevated hCG or AFP or both (embryonal carcinoma)	1	3	6.66667	40.6863	0.0245354	1	1	1	FGFR3;
Elevated MCHC	1	1	6.66667	121.253	0.00824176	1	0.687456	1	ANK1;
Elevated plasma zinc	1	1	6.66667	121.253	0.00824176	1	0.687456	1	ALB;
Embryonal tumors	1	2	6.66667	60.9282	0.0164201	1	1	1	GPC3;
Enamel hypoplasia	1	27	6.66667	4.53409	0.201538	1	1	1	FGFR3;
Endocrine Features	2	155	13.3333	1.57228	0.369774	1	1	1	CCND1; GATA3;
Endolymphatic sac tumors (ELSTs)	1	2	6.66667	60.9282	0.0164201	1	1	1	CCND1;
Enlarged calvaria with normal ossification	1	1	6.66667	121.253	0.00824176	1	0.687456	1	COL2A1;
Enlarged joints	1	1	6.66667	121.253	0.00824176	1	0.687456	1	COL2A1;
Enlarged Joints	1	2	6.66667	60.9282	0.0164201	1	1	1	COL2A1;
Enlarged MCP joints	1	1	6.66667	121.253	0.00824176	1	0.687456	1	COL2A1;
Enlarged odontoid (childhood)	1	2	6.66667	60.9282	0.0164201	1	1	1	COL2A1;
Enlarged PIP and DIP joints	1	1	6.66667	121.253	0.00824176	1	0.687456	1	COL2A1;
Epicanthal folds	1	61	6.66667	2.00731	0.401529	1	1	1	GPC3;
Epididymal cyst	1	2	6.66667	60.9282	0.0164201	1	1	1	CCND1;
Epiphyseal dysplasia	1	4	6.66667	30.5401	0.0325882	1	1	1	COL2A1;
Exaggerated lumbar lordosis during childhood and adulthood	1	1	6.66667	121.253	0.00824176	1	0.687456	1	FGFR3;
External Features	3	180	20	2.02751	0.179188	1	1	1	FGFR3; GPC3; COL2A1;
External Genitalia (Male)	3	151	20	2.41687	0.12189	1	1	1	FGFR3; GPC3; COL2A1;
Extinction of electroretinogram (before age 10)	1	1	6.66667	121.253	0.00824176	1	0.687456	1	MYO7A;
Extinguished electroretinogram	1	1	6.66667	121.253	0.00824176	1	0.687456	1	NR2E3;
Eyes	8	826	53.3333	1.17582	0.357291	1	1	1	FGFR3; MYO7A; CCND1; GPC3; BBS1; NR2E3; COL2A1; NHS;
Face	5	433	33.3333	1.40292	0.273716	1	1	1	FGFR3; GPC3; COL2A1; NHS; THAP1;
Facial dystonia	1	3	6.66667	40.6863	0.0245354	1	1	1	THAP1;
Failure to thrive	1	202	6.66667	0.606236	0.829995	1	1	1	NAGS;
Feet	4	345	26.6667	1.40931	0.312635	1	1	1	FGFR3; GPC3; BBS1; COL2A1;
Females more severely affected than males	1	1	6.66667	121.253	0.00824176	1	0.687456	1	FGFR3;
Fetal hydrops	1	3	6.66667	40.6863	0.0245354	1	1	1	COL2A1;
FGFR3, G380R (	1	1	6.66667	121.253	0.00824176	1	0.687456	1	FGFR3;
Final adult height 106-145cm	1	1	6.66667	121.253	0.00824176	1	0.687456	1	COL2A1;
Final adult height, 84-128cm	1	1	6.66667	121.253	0.00824176	1	0.687456	1	COL2A1;
Final height, 125 to 160 cm	1	1	6.66667	121.253	0.00824176	1	0.687456	1	FGFR3;
Fingernail hypoplasia	1	1	6.66667	121.253	0.00824176	1	0.687456	1	GPC3;
Flared and irregular metaphyses	1	1	6.66667	121.253	0.00824176	1	0.687456	1	FGFR3;
Flared, cupped metaphyses	1	1	6.66667	121.253	0.00824176	1	0.687456	1	COL2A1;
Flared iliac wing	1	1	6.66667	121.253	0.00824176	1	0.687456	1	GPC3;
Flat acetabular roof	1	3	6.66667	40.6863	0.0245354	1	1	1	COL2A1;
Flat face	1	20	6.66667	6.12022	0.153286	1	1	1	COL2A1;
Flat, irregular femoral epiphyses	1	1	6.66667	121.253	0.00824176	1	0.687456	1	COL2A1;
Flat midface	1	8	6.66667	15.2891	0.0641831	1	1	1	COL2A1;
Flat rooted acetabulae	1	1	6.66667	121.253	0.00824176	1	0.687456	1	FGFR3;
Flattened capital femoral epiphyses	1	2	6.66667	60.9282	0.0164201	1	1	1	COL2A1;
Flattened epiphyses	1	2	6.66667	60.9282	0.0164201	1	1	1	COL2A1;
Flattened epiphyses around knee joint	1	1	6.66667	121.253	0.00824176	1	0.687456	1	COL2A1;
Flattened, squared-off epiphyses of tubular bones	1	1	6.66667	121.253	0.00824176	1	0.687456	1	COL2A1;
Flexion contractures of hips	1	1	6.66667	121.253	0.00824176	1	0.687456	1	COL2A1;
Foramen magnum stenosis	1	1	6.66667	121.253	0.00824176	1	0.687456	1	FGFR3;
French telephone receiver femurs'	1	1	6.66667	121.253	0.00824176	1	0.687456	1	FGFR3;
Frequent otitis media	1	1	6.66667	121.253	0.00824176	1	0.687456	1	COL2A1;
Frontal bossing	1	58	6.66667	2.11111	0.385972	1	1	1	FGFR3;
Fusion of C2-C3 posterior elements	1	1	6.66667	121.253	0.00824176	1	0.687456	1	GPC3;
Gallstones	1	2	6.66667	60.9282	0.0164201	1	1	1	ANK1;
Gastrointestinal	3	425	20	0.858738	0.717489	1	1	1	GPC3; BBS1; NAGS;
Generalized epiphyseal delay (infancy)	1	1	6.66667	121.253	0.00824176	1	0.687456	1	COL2A1;
Generalized joint laxity	1	2	6.66667	60.9282	0.0164201	1	1	1	FGFR3;
Generally considered to be a benign disorder	1	1	6.66667	121.253	0.00824176	1	0.687456	1	HAL;
Genetic heterogeneity	2	142	13.3333	1.71621	0.329158	1	1	1	MYO7A; GPC3;
Genetic heterogeneity, some patients not linked to FGFR3	1	1	6.66667	121.253	0.00824176	1	0.687456	1	FGFR3;
Genitourinary	6	478	40	1.52451	0.176691	1	1	1	FGFR3; CCND1; GPC3; BBS1; COL2A1; GATA3;
Genu valga	1	1	6.66667	121.253	0.00824176	1	0.687456	1	COL2A1;
Genu valgus	1	1	6.66667	121.253	0.00824176	1	0.687456	1	COL2A1;
Genu varum	1	6	6.66667	20.377	0.0485081	1	1	1	FGFR3;
Glaucoma	1	35	6.66667	3.49802	0.253537	1	1	1	COL2A1;
Glaucoma (50% of males)	1	1	6.66667	121.253	0.00824176	1	0.687456	1	NHS;
Gonadal mosaicism reported	1	1	6.66667	121.253	0.00824176	1	0.687456	1	COL2A1;
Gradual progression of hearing loss	1	1	6.66667	121.253	0.00824176	1	0.687456	1	MYO7A;
Growth	5	609	33.3333	0.997485	0.600654	1	1	1	FGFR3; GPC3; BBS1; NAGS; COL2A1;
GU	1	73	6.66667	1.67738	0.460154	1	1	1	FGFR3;
Hair	1	240	6.66667	0.510252	0.881161	1	1	1	FGFR3;
Hands	5	349	33.3333	1.74058	0.142767	1	1	1	FGFR3; GPC3; BBS1; COL2A1; NHS;
Head	4	345	26.6667	1.40931	0.312635	1	1	1	FGFR3; GPC3; COL2A1; THAP1;
Head and Neck	9	954	60	1.14516	0.372475	1	1	1	FGFR3; MYO7A; CCND1; GPC3; BBS1; COL2A1; NHS; GATA3; THAP1;
Hearing loss	1	41	6.66667	2.98624	0.290442	1	1	1	GPC3;
Hearing loss affects all frequencies	1	1	6.66667	121.253	0.00824176	1	0.687456	1	MYO7A;
Hearing loss, mixed conductive-sensorineural	1	3	6.66667	40.6863	0.0245354	1	1	1	FGFR3;
Hearing loss, sensorineural	2	38	13.3333	6.41197	0.0375687	1	1	1	FGFR3; COL2A1;
Hearing loss, sensorineural, associated with ELSTs	1	2	6.66667	60.9282	0.0164201	1	1	1	CCND1;
Hearing loss, sensorineural, moderate, postlingual	1	1	6.66667	121.253	0.00824176	1	0.687456	1	MYO7A;
Hearing loss, sensorineural, prelingual	1	2	6.66667	60.9282	0.0164201	1	1	1	MYO7A;
Heart	3	351	20	1.03978	0.575458	1	1	1	GPC3; BBS1; COL2A1;
Heberden's nodes	1	1	6.66667	121.253	0.00824176	1	0.687456	1	COL2A1;
Height	3	290	20	1.25848	0.436645	1	1	1	FGFR3; GPC3; COL2A1;
Hemangioblastoma, sporadic cerebellar (e.g.,	1	2	6.66667	60.9282	0.0164201	1	1	1	CCND1;
Hematology	2	229	13.3333	1.06423	0.580691	1	1	1	CCND1; ANK1;
Hemolytic anemia	1	24	6.66667	5.10061	0.181182	1	1	1	ANK1;
Hepatic fibrosis	1	27	6.66667	4.53409	0.201538	1	1	1	BBS1;
Hepatomegaly	1	130	6.66667	0.941971	0.672439	1	1	1	GPC3;
Hereditary nonpolyposis colorectal carcinoma	3	25	20	14.593	0.000935186	1	0.687456	1	FGFR3; CCND1; MCC;
High-arched palate	1	86	6.66667	1.42385	0.51759	1	1	1	FGFR3;
High arched palate	1	32	6.66667	3.82586	0.234419	1	1	1	BBS1;
Highest incidence in men of European descent	1	3	6.66667	40.6863	0.0245354	1	1	1	FGFR3;
Highly variable phenotype, even within families	1	5	6.66667	24.4443	0.040579	1	1	1	CCND1;
High M-component	1	3	6.66667	40.6863	0.0245354	1	1	1	CCND1;
High prevalence in Japan	1	1	6.66667	121.253	0.00824176	1	0.687456	1	HAL;
Hip dislocation	1	28	6.66667	4.37221	0.208218	1	1	1	COL2A1;
Hirschsprung disease (	1	19	6.66667	6.44217	0.146174	1	1	1	BBS1;
HISTIDINEMIA	1	1	6.66667	121.253	0.00824176	1	0.687456	1	HAL;
Horizontal acetabulae	1	1	6.66667	121.253	0.00824176	1	0.687456	1	COL2A1;
Hydrocephalus	2	49	13.3333	4.97284	0.0596557	1	1	1	FGFR3; GPC3;
Hydrocephalus, occasional	1	1	6.66667	121.253	0.00824176	1	0.687456	1	FGFR3;
Hyperammonemia	1	17	6.66667	7.19963	0.131784	1	1	1	NAGS;
Hyperbilirubinemia	1	6	6.66667	20.377	0.0485081	1	1	1	ANK1;
Hypernephroma	1	2	6.66667	60.9282	0.0164201	1	1	1	CCND1;
Hyperplastic islets of Langerhans	1	1	6.66667	121.253	0.00824176	1	0.687456	1	GPC3;
Hypertelorism	2	121	13.3333	2.01404	0.262939	1	1	1	FGFR3; GPC3;
Hypertension	2	57	13.3333	4.27502	0.0779583	1	1	1	CCND1; BBS1;
Hypochondrogenesis represents clinical variability within the achondrogenesis-hypochondrogenesis spectrum	1	1	6.66667	121.253	0.00824176	1	0.687456	1	COL2A1;
Hypodontia	2	51	13.3333	4.77786	0.064069	1	1	1	FGFR3; BBS1;
Hypogonadism (major)	1	19	6.66667	6.44217	0.146174	1	1	1	BBS1;
Hypoparathyroidism	1	5	6.66667	24.4443	0.040579	1	1	1	GATA3;
Hypoplastic ilia	1	4	6.66667	30.5401	0.0325882	1	1	1	COL2A1;
Hypoplastic ischia	1	4	6.66667	30.5401	0.0325882	1	1	1	COL2A1;
Hypoplastic pelvic bones	1	1	6.66667	121.253	0.00824176	1	0.687456	1	COL2A1;
Hypoplastic pubic bones	1	1	6.66667	121.253	0.00824176	1	0.687456	1	COL2A1;
Hypoplastic pubis	1	2	6.66667	60.9282	0.0164201	1	1	1	COL2A1;
Hypoplastic, wide sacrosciatic notches	1	1	6.66667	121.253	0.00824176	1	0.687456	1	COL2A1;
Hypospadias	1	55	6.66667	2.22624	0.370037	1	1	1	GPC3;
Hypotonia	2	233	13.3333	1.04596	0.590748	1	1	1	GPC3; COL2A1;
Hypotonia in infancy and early childhood	1	1	6.66667	121.253	0.00824176	1	0.687456	1	FGFR3;
Incidence of 1 in 39,000	1	2	6.66667	60.9282	0.0164201	1	1	1	CCND1;
Increased alpha-fetoprotein	1	2	6.66667	60.9282	0.0164201	1	1	1	GPC3;
Increased histidine in blood, urine, and CSF	1	1	6.66667	121.253	0.00824176	1	0.687456	1	HAL;
Increased lumbar lordosis	1	6	6.66667	20.377	0.0485081	1	1	1	COL2A1;
Increased osmotic fragility	1	1	6.66667	121.253	0.00824176	1	0.687456	1	ANK1;
Increased reticulocyte count	1	4	6.66667	30.5401	0.0325882	1	1	1	ANK1;
Increased serum glutamine	1	1	6.66667	121.253	0.00824176	1	0.687456	1	NAGS;
Inguinal hernia	2	44	13.3333	5.53781	0.0491375	1	1	1	GPC3; COL2A1;
Inguinal hernias	1	5	6.66667	24.4443	0.040579	1	1	1	COL2A1;
Internal Genitalia (Female)	1	96	6.66667	1.27555	0.557834	1	1	1	GATA3;
Internal Genitalia (Male)	4	148	26.6667	3.28508	0.0282198	1	1	1	FGFR3; CCND1; GPC3; BBS1;
Intestinal malrotation	1	5	6.66667	24.4443	0.040579	1	1	1	GPC3;
Irregular endplates	1	2	6.66667	60.9282	0.0164201	1	1	1	COL2A1;
Isochromosome 12p (i(12p))	1	3	6.66667	40.6863	0.0245354	1	1	1	FGFR3;
Isolated cases	1	49	6.66667	2.49879	0.337004	1	1	1	FGFR3;
Jaundice	1	28	6.66667	4.37221	0.208218	1	1	1	ANK1;
Jaw dystonia	1	1	6.66667	121.253	0.00824176	1	0.687456	1	THAP1;
Joint contractures	1	49	6.66667	2.49879	0.337004	1	1	1	COL2A1;
Joint pains	1	2	6.66667	60.9282	0.0164201	1	1	1	COL2A1;
Joint stiffness	1	6	6.66667	20.377	0.0485081	1	1	1	COL2A1;
Jugular bulb dehiscence (in some patients)	1	1	6.66667	121.253	0.00824176	1	0.687456	1	FGFR3;
Keratan sulfaturia in some patients	1	1	6.66667	121.253	0.00824176	1	0.687456	1	COL2A1;
Kidneys	5	276	33.3333	2.20093	0.063409	1	1	1	FGFR3; CCND1; GPC3; BBS1; GATA3;
KNIEST DYSPLASIA	1	1	6.66667	121.253	0.00824176	1	0.687456	1	COL2A1;
Known as the 'French variety' of Usher syndrome since the majority of families are from Poitou-Charentes, France	1	1	6.66667	121.253	0.00824176	1	0.687456	1	MYO7A;
Kyphosis	1	56	6.66667	2.1865	0.375391	1	1	1	COL2A1;
Lab	2	266	13.3333	0.916202	0.667658	1	1	1	NR2E3; ALB;
Laboratory Abnormalities	6	712	40	1.02348	0.569676	1	1	1	FGFR3; CCND1; NAGS; COL2A1; ANK1; HAL;
Lack of trident hand helps distinguish it from achondroplasia	1	1	6.66667	121.253	0.00824176	1	0.687456	1	FGFR3;
Large anteverted pinnae (90% males, 40% females)	1	1	6.66667	121.253	0.00824176	1	0.687456	1	NHS;
Large kidneys	1	3	6.66667	40.6863	0.0245354	1	1	1	GPC3;
Large tarsal bones	1	2	6.66667	60.9282	0.0164201	1	1	1	COL2A1;
Laryngeal dystonia	1	2	6.66667	60.9282	0.0164201	1	1	1	THAP1;
Larynx	1	46	6.66667	2.66172	0.319888	1	1	1	THAP1;
Learning disabilities (major)	1	19	6.66667	6.44217	0.146174	1	1	1	BBS1;
Left ventricular hypertrophy	1	26	6.66667	4.70841	0.194806	1	1	1	BBS1;
Legg-Calve-Perthes disease	1	1	6.66667	121.253	0.00824176	1	0.687456	1	COL2A1;
Lethargy	1	64	6.66667	1.91323	0.416718	1	1	1	NAGS;
Limbal stem cell deficiency	1	3	6.66667	40.6863	0.0245354	1	1	1	FGFR3;
Limbs	3	339	20	1.07658	0.549415	1	1	1	FGFR3; COL2A1; THAP1;
Limited elbow and hip extension	1	2	6.66667	60.9282	0.0164201	1	1	1	FGFR3;
Limited elbow extension	1	8	6.66667	15.2891	0.0641831	1	1	1	COL2A1;
Limited extension at elbows	1	1	6.66667	121.253	0.00824176	1	0.687456	1	FGFR3;
Limited joint mobility	1	3	6.66667	40.6863	0.0245354	1	1	1	COL2A1;
Liquefied vitreous body	1	1	6.66667	121.253	0.00824176	1	0.687456	1	NR2E3;
Liver	4	256	26.6667	1.89924	0.148713	1	1	1	CCND1; GPC3; BBS1; ANK1;
Liver hemangiomas	1	2	6.66667	60.9282	0.0164201	1	1	1	CCND1;
Long, narrow face	1	6	6.66667	20.377	0.0485081	1	1	1	NHS;
Lordosis	1	15	6.66667	8.15894	0.117168	1	1	1	COL2A1;
Loss of tumor suppressor gene	1	3	6.66667	40.6863	0.0245354	1	1	1	GPC3;
Low nasal bridge	2	20	13.3333	12.1799	0.0110605	1	0.919104	1	FGFR3; COL2A1;
Low-set frontal hairline	1	1	6.66667	121.253	0.00824176	1	0.687456	1	FGFR3;
Lumbar kyphoscoliosis	1	1	6.66667	121.253	0.00824176	1	0.687456	1	COL2A1;
Lumbar kyphosis in infancy	1	1	6.66667	121.253	0.00824176	1	0.687456	1	FGFR3;
Lumbar lordosis	1	11	6.66667	11.1231	0.0872444	1	1	1	COL2A1;
Lung	4	171	26.6667	2.84326	0.0450451	1	1	1	FGFR3; CCND1; GPC3; COL2A1;
Lung segmentation defects	1	1	6.66667	121.253	0.00824176	1	0.687456	1	GPC3;
Luton and Torrance type differentiated based on histologic findings in cartilage	1	1	6.66667	121.253	0.00824176	1	0.687456	1	COL2A1;
Luton type - hypercellular resting cartilage, normal and large cells, normal column formation, focal degenerating chondrocyte incorporation and focal disorganization	1	1	6.66667	121.253	0.00824176	1	0.687456	1	COL2A1;
Macrocephaly	3	60	20	6.08185	0.0116869	1	0.967514	1	FGFR3; GPC3; COL2A1;
Macroglossia	1	18	6.66667	6.79987	0.139008	1	1	1	GPC3;
Macrostomia	1	9	6.66667	13.5922	0.07193	1	1	1	GPC3;
Majority of Wilms tumors are sporadic	1	3	6.66667	40.6863	0.0245354	1	1	1	GPC3;
Malar hypoplasia	1	15	6.66667	8.15894	0.117168	1	1	1	COL2A1;
Male germ cell tumors (GCT), 2 subtypes -	1	3	6.66667	40.6863	0.0245354	1	1	1	FGFR3;
Mandibular hypoplasia	1	9	6.66667	13.5922	0.07193	1	1	1	COL2A1;
Marfanoid habitus	1	6	6.66667	20.377	0.0485081	1	1	1	COL2A1;
Marked shortness and bowing of long bones	1	1	6.66667	121.253	0.00824176	1	0.687456	1	FGFR3;
Maternal	1	10	6.66667	12.2343	0.0796169	1	1	1	GPC3;
Mean female height, 124 cm	1	1	6.66667	121.253	0.00824176	1	0.687456	1	FGFR3;
Mean male adult height, 131 cm	1	1	6.66667	121.253	0.00824176	1	0.687456	1	FGFR3;
Meckel diverticulum	1	3	6.66667	40.6863	0.0245354	1	1	1	GPC3;
Megaepiphyses (late)	1	1	6.66667	121.253	0.00824176	1	0.687456	1	COL2A1;
Megalencephaly	1	6	6.66667	20.377	0.0485081	1	1	1	FGFR3;
Membranous (type I) vitreous phenotype	1	1	6.66667	121.253	0.00824176	1	0.687456	1	COL2A1;
Mental impairment may develop with repeated acute episodes	1	1	6.66667	121.253	0.00824176	1	0.687456	1	NAGS;
Mental retardation	1	200	6.66667	0.612298	0.826802	1	1	1	FGFR3;
Mental retardation (rare less than 1% of cases)	1	1	6.66667	121.253	0.00824176	1	0.687456	1	HAL;
Metaphyseal cupping	1	3	6.66667	40.6863	0.0245354	1	1	1	COL2A1;
Metaphyseal flaring	2	7	13.3333	34.7673	0.00130065	1	0.687456	1	FGFR3; COL2A1;
Metaphyseal irregularity and sclerosis (childhood)	1	1	6.66667	121.253	0.00824176	1	0.687456	1	COL2A1;
Microcornea	1	18	6.66667	6.79987	0.139008	1	1	1	NHS;
Microphthalmia	1	37	6.66667	3.30899	0.266033	1	1	1	NHS;
Midface hypoplasia	2	38	13.3333	6.41197	0.0375687	1	1	1	FGFR3; COL2A1;
Midline groove of lower lip	1	1	6.66667	121.253	0.00824176	1	0.687456	1	GPC3;
Mild frontal bossing	1	1	6.66667	121.253	0.00824176	1	0.687456	1	FGFR3;
Mild-moderate mental retardation (80% affected males)	1	1	6.66667	121.253	0.00824176	1	0.687456	1	NHS;
Mild platyspondyly	1	6	6.66667	20.377	0.0485081	1	1	1	COL2A1;
Mild spondyloepiphyseal dysplasia	1	2	6.66667	60.9282	0.0164201	1	1	1	COL2A1;
Misc	2	219	13.3333	1.11282	0.554874	1	1	1	COL2A1; NHS;
Miscellaneous	10	1228	66.6667	0.988383	0.644494	1	1	1	FGFR3; MYO7A; CCND1; GPC3; BBS1; NAGS; COL2A1; ANK1; HAL; THAP1;
Mitral valve prolapse	1	20	6.66667	6.12022	0.153286	1	1	1	COL2A1;
Mixed hearing loss	1	6	6.66667	20.377	0.0485081	1	1	1	COL2A1;
Monoclonal gammopathy	1	3	6.66667	40.6863	0.0245354	1	1	1	CCND1;
Most cases result from de novo mutations	1	2	6.66667	60.9282	0.0164201	1	1	1	COL2A1;
Most common cancer in men aged 15-40 years	1	3	6.66667	40.6863	0.0245354	1	1	1	FGFR3;
Mouth	5	417	33.3333	1.45675	0.246168	1	1	1	FGFR3; GPC3; BBS1; COL2A1; THAP1;
Movement	1	29	6.66667	4.2215	0.214846	1	1	1	FGFR3;
Multiple myeloma	1	3	6.66667	40.6863	0.0245354	1	1	1	CCND1;
Multiple nevi	1	4	6.66667	30.5401	0.0325882	1	1	1	FGFR3;
Multiple pancreatic cysts	1	2	6.66667	60.9282	0.0164201	1	1	1	CCND1;
Multiple renal cysts	1	2	6.66667	60.9282	0.0164201	1	1	1	CCND1;
MYELOMA, MULTIPLE	1	3	6.66667	40.6863	0.0245354	1	1	1	CCND1;
Myoclonus (less common)	1	2	6.66667	60.9282	0.0164201	1	1	1	THAP1;
Myopia	1	47	6.66667	2.6051	0.325639	1	1	1	COL2A1;
Myopia, progressive, early onset	1	1	6.66667	121.253	0.00824176	1	0.687456	1	COL2A1;
N-ACETYLGLUTAMATE SYNTHASE DEFICIENCY	1	1	6.66667	121.253	0.00824176	1	0.687456	1	NAGS;
Nails	1	123	6.66667	0.995575	0.651397	1	1	1	GPC3;
Narrow chest	1	14	6.66667	8.74131	0.109774	1	1	1	COL2A1;
Narrowing of joint spaces	1	1	6.66667	121.253	0.00824176	1	0.687456	1	COL2A1;
Narrow sacroiliac groove	1	1	6.66667	121.253	0.00824176	1	0.687456	1	FGFR3;
Narrow sacroiliac notches in infancy	1	1	6.66667	121.253	0.00824176	1	0.687456	1	GPC3;
Narrow sacrosciatic notches	1	3	6.66667	40.6863	0.0245354	1	1	1	COL2A1;
Narrow thorax	1	11	6.66667	11.1231	0.0872444	1	1	1	FGFR3;
Nasolacrimal duct obstruction	1	5	6.66667	24.4443	0.040579	1	1	1	FGFR3;
Neck	2	130	13.3333	1.87462	0.291328	1	1	1	COL2A1; THAP1;
Necrosis of capital femoral epiphysis	1	1	6.66667	121.253	0.00824176	1	0.687456	1	COL2A1;
Negative direct antiglobulin (Coombs) test	1	1	6.66667	121.253	0.00824176	1	0.687456	1	ANK1;
Neoplasia	3	151	20	2.41687	0.12189	1	1	1	FGFR3; CCND1; GPC3;
Nephroblastoma	1	4	6.66667	30.5401	0.0325882	1	1	1	GPC3;
Nephrogenic diabetes insipidus	1	19	6.66667	6.44217	0.146174	1	1	1	BBS1;
Nephrosclerosis	1	3	6.66667	40.6863	0.0245354	1	1	1	FGFR3;
Nephrosis	1	1	6.66667	121.253	0.00824176	1	0.687456	1	GATA3;
Neurobehavioral changes associated with hyperammonemia	1	1	6.66667	121.253	0.00824176	1	0.687456	1	NAGS;
Neurologic	10	930	66.6667	1.30509	0.170892	1	1	1	FGFR3; MYO7A; CCND1; GPC3; BBS1; NAGS; COL2A1; NHS; HAL; THAP1;
NEVUS, EPIDERMAL	1	4	6.66667	30.5401	0.0325882	1	1	1	FGFR3;
Non-ossified sacrum, ischial, and pubic bones	1	1	6.66667	121.253	0.00824176	1	0.687456	1	COL2A1;
Non-ossified talus and calcaneus	1	1	6.66667	121.253	0.00824176	1	0.687456	1	COL2A1;
Nonseminoma (embryonal carcinoma, teratoma, choriocarcinoma, endodermal sinus tumor)	1	3	6.66667	40.6863	0.0245354	1	1	1	FGFR3;
No ocular symptoms	1	2	6.66667	60.9282	0.0164201	1	1	1	COL2A1;
Normal clavicles	1	1	6.66667	121.253	0.00824176	1	0.687456	1	COL2A1;
Normal height	2	5	13.3333	48.6465	0.000625303	1	0.687456	1	FGFR3; COL2A1;
Normal intelligence	1	45	6.66667	2.72086	0.314092	1	1	1	COL2A1;
Normal/mild midface hypoplasia	1	1	6.66667	121.253	0.00824176	1	0.687456	1	FGFR3;
Normal urinary orotic acid	1	1	6.66667	121.253	0.00824176	1	0.687456	1	NAGS;
Normal vision (females)	1	1	6.66667	121.253	0.00824176	1	0.687456	1	NHS;
Nose	4	314	26.6667	1.54844	0.251162	1	1	1	FGFR3; GPC3; COL2A1; NHS;
Nuchal translucency	1	1	6.66667	121.253	0.00824176	1	0.687456	1	GPC3;
Nystagmus	1	122	6.66667	1.00373	0.64829	1	1	1	NHS;
Obesity	1	43	6.66667	2.84738	0.302361	1	1	1	BBS1;
Occasional cataracts	1	1	6.66667	121.253	0.00824176	1	0.687456	1	COL2A1;
Occasional conductive hearing loss	1	1	6.66667	121.253	0.00824176	1	0.687456	1	COL2A1;
Occasionally germ cell tumor arise from extra gonadal site (e.g., mediastinum, retroperitoneum, pineal gland)	1	3	6.66667	40.6863	0.0245354	1	1	1	FGFR3;
Occasional mental retardation	1	3	6.66667	40.6863	0.0245354	1	1	1	FGFR3;
Occipitoatlantal instability	1	1	6.66667	121.253	0.00824176	1	0.687456	1	COL2A1;
Odontoid hypoplasia	1	13	6.66667	9.4132	0.102323	1	1	1	COL2A1;
Often presents with cranial or cervical involvement	1	1	6.66667	121.253	0.00824176	1	0.687456	1	THAP1;
Oncology	3	80	20	4.56158	0.0253927	1	1	1	FGFR3; CCND1; MCC;
Onset 6-9 years	1	1	6.66667	121.253	0.00824176	1	0.687456	1	COL2A1;
Onset between 2-5 years	1	3	6.66667	40.6863	0.0245354	1	1	1	GPC3;
Onset of osteoarthritis in teens to early adulthood	1	1	6.66667	121.253	0.00824176	1	0.687456	1	COL2A1;
Onset usually at birth, but may occur later	1	1	6.66667	121.253	0.00824176	1	0.687456	1	MYO7A;
Oral candidiasis	1	3	6.66667	40.6863	0.0245354	1	1	1	FGFR3;
Osteoarthritis (hips, knees, shoulders, wrists, hands)	1	1	6.66667	121.253	0.00824176	1	0.687456	1	COL2A1;
OSTEOARTHRITIS WITH MILD CHONDRODYSPLASIA	1	1	6.66667	121.253	0.00824176	1	0.687456	1	COL2A1;
Other	5	384	33.3333	1.58193	0.192908	1	1	1	FGFR3; GPC3; BBS1; NAGS; COL2A1;
Ovoid vertebral bodies	1	9	6.66667	13.5922	0.07193	1	1	1	COL2A1;
Painful joints	1	1	6.66667	121.253	0.00824176	1	0.687456	1	COL2A1;
Painful limp	1	1	6.66667	121.253	0.00824176	1	0.687456	1	COL2A1;
Painless testicular mass	1	3	6.66667	40.6863	0.0245354	1	1	1	FGFR3;
Pancreas	2	51	13.3333	4.77786	0.064069	1	1	1	CCND1; GPC3;
Pancreatic cancer	1	4	6.66667	30.5401	0.0325882	1	1	1	CCND1;
Pancreatic hemangioblastoma	1	2	6.66667	60.9282	0.0164201	1	1	1	CCND1;
Paraganglioma	1	2	6.66667	60.9282	0.0164201	1	1	1	CCND1;
Paraproteinemia	1	3	6.66667	40.6863	0.0245354	1	1	1	CCND1;
Parental somatic mosaicism in 2 cases produced mild phenotype in the patients	1	1	6.66667	121.253	0.00824176	1	0.687456	1	COL2A1;
Partially reduced visually acuity	1	3	6.66667	40.6863	0.0245354	1	1	1	FGFR3;
Patent ductus arteriosus	1	41	6.66667	2.98624	0.290442	1	1	1	GPC3;
Paternal age effect	1	6	6.66667	20.377	0.0485081	1	1	1	FGFR3;
Patients with homozygous mutations have a more severe disorder	1	1	6.66667	121.253	0.00824176	1	0.687456	1	ANK1;
Patients with null mutations have neonatal onset within 72 hours of birth	1	1	6.66667	121.253	0.00824176	1	0.687456	1	NAGS;
Patients with residual enzyme activity have childhood or adult onset	1	1	6.66667	121.253	0.00824176	1	0.687456	1	NAGS;
Pectus carinatum	1	27	6.66667	4.53409	0.201538	1	1	1	COL2A1;
Pectus excavatum	2	44	13.3333	5.53781	0.0491375	1	1	1	GPC3; COL2A1;
Peg-shaped incisors	1	4	6.66667	30.5401	0.0325882	1	1	1	FGFR3;
Pelvis	3	153	20	2.38528	0.125569	1	1	1	FGFR3; GPC3; COL2A1;
Peripheral Nervous System	1	178	6.66667	0.687971	0.787776	1	1	1	CCND1;
Pes planus	1	37	6.66667	3.30899	0.266033	1	1	1	COL2A1;
Pheochromocytoma	1	5	6.66667	24.4443	0.040579	1	1	1	CCND1;
Pierre-Robin sequence	1	4	6.66667	30.5401	0.0325882	1	1	1	COL2A1;
Plagiocephaly	1	3	6.66667	40.6863	0.0245354	1	1	1	FGFR3;
Platyspondyly	2	26	13.3333	9.3702	0.0183867	1	1	1	FGFR3; COL2A1;
Platyspondyly (childhood)	1	3	6.66667	40.6863	0.0245354	1	1	1	COL2A1;
Platyspondyly, extreme	1	1	6.66667	121.253	0.00824176	1	0.687456	1	COL2A1;
Platyspondyly, mild	1	1	6.66667	121.253	0.00824176	1	0.687456	1	COL2A1;
Platyspondyly with anterior wedging	1	1	6.66667	121.253	0.00824176	1	0.687456	1	COL2A1;
Polycythemia	1	6	6.66667	20.377	0.0485081	1	1	1	CCND1;
Polydactyly (major)	1	19	6.66667	6.44217	0.146174	1	1	1	BBS1;
Polyhydramnios	2	45	13.3333	5.41477	0.05118	1	1	1	FGFR3; COL2A1;
Polysplenia	1	2	6.66667	60.9282	0.0164201	1	1	1	GPC3;
Poor coordination	1	22	6.66667	5.56409	0.167343	1	1	1	BBS1;
Postaxial polydactyly	1	23	6.66667	5.32228	0.174289	1	1	1	GPC3;
Posterior Y-sutural cataracts (females)	1	1	6.66667	121.253	0.00824176	1	0.687456	1	NHS;
Preauricular pits	1	14	6.66667	8.74131	0.109774	1	1	1	GPC3;
Preauricular tags	1	3	6.66667	40.6863	0.0245354	1	1	1	GPC3;
Preaxial polydactyly	1	11	6.66667	11.1231	0.0872444	1	1	1	FGFR3;
Premature osteoarthritis	1	4	6.66667	30.5401	0.0325882	1	1	1	COL2A1;
Prenatal diagnosis by ultrasound	1	3	6.66667	40.6863	0.0245354	1	1	1	FGFR3;
Prenatal Manifestations	3	115	20	3.17339	0.0640609	1	1	1	FGFR3; GPC3; COL2A1;
Presence of 4 major features or 3 major and 2 minor features establishes the diagnosis	1	19	6.66667	6.44217	0.146174	1	1	1	BBS1;
Primary immunoglobulin-related amyloidosis (AL)	1	3	6.66667	40.6863	0.0245354	1	1	1	CCND1;
Profound mental retardation and hypotonia in survivors	1	1	6.66667	121.253	0.00824176	1	0.687456	1	FGFR3;
Profound sensorineural hearing loss	1	1	6.66667	121.253	0.00824176	1	0.687456	1	MYO7A;
Progressive interpediculate narrowing in lumbar spine	1	1	6.66667	121.253	0.00824176	1	0.687456	1	FGFR3;
Progressive narrowing of interpediculate distance in the lumbar vertebrate	1	1	6.66667	121.253	0.00824176	1	0.687456	1	FGFR3;
Progressive renal failure	1	3	6.66667	40.6863	0.0245354	1	1	1	GATA3;
Prominent eyes	1	19	6.66667	6.44217	0.146174	1	1	1	COL2A1;
Prominent interphalangeal joints	1	3	6.66667	40.6863	0.0245354	1	1	1	COL2A1;
Prominent nasal bridge	1	7	6.66667	17.4701	0.056376	1	1	1	NHS;
Prominent nose	1	11	6.66667	11.1231	0.0872444	1	1	1	NHS;
Protuberant abdomen	1	8	6.66667	15.2891	0.0641831	1	1	1	COL2A1;
Ptosis	1	107	6.66667	1.14443	0.598472	1	1	1	FGFR3;
'Pugilistic facies'	1	1	6.66667	121.253	0.00824176	1	0.687456	1	COL2A1;
Pulmonary hemangiomas	1	2	6.66667	60.9282	0.0164201	1	1	1	CCND1;
Pulmonic stenosis	1	7	6.66667	17.4701	0.056376	1	1	1	GPC3;
Radiology	1	28	6.66667	4.37221	0.208218	1	1	1	COL2A1;
Rare adult cases reported	1	3	6.66667	40.6863	0.0245354	1	1	1	GPC3;
Recurrent corneal ulcerations	1	3	6.66667	40.6863	0.0245354	1	1	1	FGFR3;
Recurrent otitis media in infancy and childhood	1	1	6.66667	121.253	0.00824176	1	0.687456	1	FGFR3;
Recurrent pulmonary infections	1	3	6.66667	40.6863	0.0245354	1	1	1	COL2A1;
Reduced penetrance (about 60%)	1	1	6.66667	121.253	0.00824176	1	0.687456	1	THAP1;
Relationship of rare neuropsychiatric signs to histidinemia is unclear	1	1	6.66667	121.253	0.00824176	1	0.687456	1	HAL;
Renal agenesis	1	14	6.66667	8.74131	0.109774	1	1	1	FGFR3;
Renal agenesis, unilateral (in some patients)	1	1	6.66667	121.253	0.00824176	1	0.687456	1	GATA3;
Renal anomalies (major)	1	19	6.66667	6.44217	0.146174	1	1	1	BBS1;
Renal cell carcinoma (e.g.,	1	2	6.66667	60.9282	0.0164201	1	1	1	CCND1;
Renal dysplasia	1	10	6.66667	12.2343	0.0796169	1	1	1	GATA3;
Renal hemangioblastoma	1	2	6.66667	60.9282	0.0164201	1	1	1	CCND1;
Respiratory	6	360	40	2.0242	0.0574908	1	1	1	FGFR3; CCND1; GPC3; NAGS; COL2A1; THAP1;
Respiratory distress	2	13	13.3333	18.7332	0.00469465	1	0.687456	1	NAGS; COL2A1;
Respiratory insufficiency	1	35	6.66667	3.49802	0.253537	1	1	1	FGFR3;
Respiratory insufficiency/failure	1	1	6.66667	121.253	0.00824176	1	0.687456	1	FGFR3;
Restrictive lung disease	1	9	6.66667	13.5922	0.07193	1	1	1	COL2A1;
Reticulocytosis	1	8	6.66667	15.2891	0.0641831	1	1	1	ANK1;
Retinal angiomata	1	2	6.66667	60.9282	0.0164201	1	1	1	CCND1;
Retinal detachment	1	10	6.66667	12.2343	0.0796169	1	1	1	COL2A1;
Retinal thinning	1	1	6.66667	121.253	0.00824176	1	0.687456	1	COL2A1;
Retinitis pigmentosa	2	39	13.3333	6.2476	0.0394121	1	1	1	MYO7A; BBS1;
Rhizomelic shortening	1	8	6.66667	15.2891	0.0641831	1	1	1	FGFR3;
Ribs, Sternum, Clavicles and Scapulae	3	162	20	2.25277	0.142656	1	1	1	FGFR3; GPC3; COL2A1;
Risk factors for development of TGCT - family history, cryptorchidism (	1	3	6.66667	40.6863	0.0245354	1	1	1	FGFR3;
Rod-cone dystrophy, onset by end of 2nd decade (major)	1	19	6.66667	6.44217	0.146174	1	1	1	BBS1;
Round face	1	12	6.66667	10.197	0.0948128	1	1	1	COL2A1;
Sacral defects	1	1	6.66667	121.253	0.00824176	1	0.687456	1	GPC3;
Schmorl's nodes	1	1	6.66667	121.253	0.00824176	1	0.687456	1	COL2A1;
Scoliosis	2	118	13.3333	2.06524	0.253502	1	1	1	GPC3; COL2A1;
Screwdriver blade-shaped incisors (males and females)	1	1	6.66667	121.253	0.00824176	1	0.687456	1	NHS;
Seizures	1	275	6.66667	0.445314	0.915205	1	1	1	NAGS;
Seminoma	1	3	6.66667	40.6863	0.0245354	1	1	1	FGFR3;
Sensorineural hearing loss	1	23	6.66667	5.32228	0.174289	1	1	1	COL2A1;
Septate uterus (rare)	1	1	6.66667	121.253	0.00824176	1	0.687456	1	GATA3;
Septate vagina (rare)	1	1	6.66667	121.253	0.00824176	1	0.687456	1	GATA3;
Severe cloverleaf skull (Kleeblattschaedel)	1	1	6.66667	121.253	0.00824176	1	0.687456	1	FGFR3;
Severe growth deficiency in survivors	1	1	6.66667	121.253	0.00824176	1	0.687456	1	FGFR3;
Severe limb shortening	1	1	6.66667	121.253	0.00824176	1	0.687456	1	COL2A1;
Severe platyspondyly	1	2	6.66667	60.9282	0.0164201	1	1	1	FGFR3;
Short and small iliac bones	1	1	6.66667	121.253	0.00824176	1	0.687456	1	FGFR3;
Short broad feet	1	2	6.66667	60.9282	0.0164201	1	1	1	GPC3;
Short broad hands	1	2	6.66667	60.9282	0.0164201	1	1	1	GPC3;
Short, broad thumbs	1	2	6.66667	60.9282	0.0164201	1	1	1	COL2A1;
Short, dumbbell appearance of long bones	1	1	6.66667	121.253	0.00824176	1	0.687456	1	COL2A1;
Shortened limbs	1	1	6.66667	121.253	0.00824176	1	0.687456	1	FGFR3;
Shortened vertebral bodies, mild	1	1	6.66667	121.253	0.00824176	1	0.687456	1	COL2A1;
Short feet	1	6	6.66667	20.377	0.0485081	1	1	1	COL2A1;
Short femoral neck	1	5	6.66667	24.4443	0.040579	1	1	1	FGFR3;
Short fingers	2	9	13.3333	27.0498	0.00220851	1	0.687456	1	COL2A1; NHS;
Short hands	1	7	6.66667	17.4701	0.056376	1	1	1	COL2A1;
Short, horizontal ribs	1	1	6.66667	121.253	0.00824176	1	0.687456	1	COL2A1;
Short ilia	1	1	6.66667	121.253	0.00824176	1	0.687456	1	COL2A1;
Short-limb dwarfism identifiable at birth	1	4	6.66667	30.5401	0.0325882	1	1	1	FGFR3;
Short-limb dwarfism identifiable during childhood	1	2	6.66667	60.9282	0.0164201	1	1	1	FGFR3;
Short long bones	1	5	6.66667	24.4443	0.040579	1	1	1	COL2A1;
Short metacarpals (2nd, 3rd, 4th, 5th)	1	1	6.66667	121.253	0.00824176	1	0.687456	1	COL2A1;
Short metacarpals	1	17	6.66667	7.19963	0.131784	1	1	1	COL2A1;
Short metatarsals (4th)	1	1	6.66667	121.253	0.00824176	1	0.687456	1	COL2A1;
Short middle phalanges	1	2	6.66667	60.9282	0.0164201	1	1	1	FGFR3;
Short neck	1	63	6.66667	1.94359	0.411695	1	1	1	COL2A1;
Short nose	1	26	6.66667	4.70841	0.194806	1	1	1	GPC3;
Short phalanges	1	11	6.66667	11.1231	0.0872444	1	1	1	COL2A1;
Short proximal and middle phalanges	1	1	6.66667	121.253	0.00824176	1	0.687456	1	COL2A1;
Short radius	1	5	6.66667	24.4443	0.040579	1	1	1	FGFR3;
Short ribs	1	9	6.66667	13.5922	0.07193	1	1	1	FGFR3;
Short, squared ilia	1	1	6.66667	121.253	0.00824176	1	0.687456	1	FGFR3;
Short stature	1	172	6.66667	0.711968	0.775789	1	1	1	COL2A1;
Short stature, disproportionate (short trunk)	1	3	6.66667	40.6863	0.0245354	1	1	1	COL2A1;
Short, thin ribs	1	2	6.66667	60.9282	0.0164201	1	1	1	COL2A1;
Short trunk	1	6	6.66667	20.377	0.0485081	1	1	1	COL2A1;
Short tubular bones	1	4	6.66667	30.5401	0.0325882	1	1	1	COL2A1;
Short tubular bones with mild metaphyseal flare	1	1	6.66667	121.253	0.00824176	1	0.687456	1	FGFR3;
Short, tubular long bones	1	1	6.66667	121.253	0.00824176	1	0.687456	1	COL2A1;
Short ulna	2	5	13.3333	48.6465	0.000625303	1	0.687456	1	FGFR3; COL2A1;
Significant phenotypic variability	1	2	6.66667	60.9282	0.0164201	1	1	1	FGFR3;
Simple, cup-shaped ears	1	3	6.66667	40.6863	0.0245354	1	1	1	FGFR3;
Six lumbar vertebrae	1	1	6.66667	121.253	0.00824176	1	0.687456	1	GPC3;
Skel	1	46	6.66667	2.66172	0.319888	1	1	1	COL2A1;
Skeletal	6	634	40	1.1494	0.430224	1	1	1	FGFR3; GPC3; BBS1; COL2A1; NHS; THAP1;
Skin	3	539	20	0.677115	0.867546	1	1	1	FGFR3; GPC3; HAL;
Skin, Nails, Hair	3	554	20	0.658782	0.881487	1	1	1	FGFR3; GPC3; HAL;
Skull	2	148	13.3333	1.64664	0.347972	1	1	1	FGFR3; COL2A1;
Small abnormally formed scapula	1	1	6.66667	121.253	0.00824176	1	0.687456	1	FGFR3;
Small abnormally formed scapulae	1	1	6.66667	121.253	0.00824176	1	0.687456	1	FGFR3;
Small face	1	5	6.66667	24.4443	0.040579	1	1	1	FGFR3;
Small foramen magnum	1	1	6.66667	121.253	0.00824176	1	0.687456	1	FGFR3;
Small iliac wings with concave inferior and medial margin	1	1	6.66667	121.253	0.00824176	1	0.687456	1	COL2A1;
Small jaw	1	2	6.66667	60.9282	0.0164201	1	1	1	COL2A1;
Small mouth	1	27	6.66667	4.53409	0.201538	1	1	1	COL2A1;
Small sacroiliac notches	1	1	6.66667	121.253	0.00824176	1	0.687456	1	FGFR3;
Small tooth roots	1	19	6.66667	6.44217	0.146174	1	1	1	BBS1;
Snub nose	1	2	6.66667	60.9282	0.0164201	1	1	1	COL2A1;
Somatic mutation	2	30	13.3333	8.12125	0.0241464	1	1	1	CCND1; GPC3;
Specific growth curves are available	1	4	6.66667	30.5401	0.0325882	1	1	1	COL2A1;
Speech delay	1	41	6.66667	2.98624	0.290442	1	1	1	BBS1;
Speech disorder	1	21	6.66667	5.82892	0.160342	1	1	1	BBS1;
Speech disorders (rare)	1	1	6.66667	121.253	0.00824176	1	0.687456	1	HAL;
Spherocytosis	1	1	6.66667	121.253	0.00824176	1	0.687456	1	ANK1;
Spinal cord hemangioblastoma	1	2	6.66667	60.9282	0.0164201	1	1	1	CCND1;
Spine	3	286	20	1.27608	0.427103	1	1	1	FGFR3; GPC3; COL2A1;
Splayed epiphyses and metaphyses	1	1	6.66667	121.253	0.00824176	1	0.687456	1	COL2A1;
Spleen	2	109	13.3333	2.23575	0.225364	1	1	1	GPC3; ANK1;
Splenomegaly	2	84	13.3333	2.90107	0.149977	1	1	1	GPC3; ANK1;
Spondyloepiphyseal dysplasia	1	4	6.66667	30.5401	0.0325882	1	1	1	COL2A1;
SPONDYLOPERIPHERAL DYSPLASIA	1	1	6.66667	121.253	0.00824176	1	0.687456	1	COL2A1;
Square iliac wings	1	2	6.66667	60.9282	0.0164201	1	1	1	COL2A1;
Stillborn or death shortly after birth	1	2	6.66667	60.9282	0.0164201	1	1	1	COL2A1;
Strabismus	1	128	6.66667	0.956689	0.666552	1	1	1	BBS1;
Straight femurs	1	1	6.66667	121.253	0.00824176	1	0.687456	1	FGFR3;
Submucous cleft lip	1	1	6.66667	121.253	0.00824176	1	0.687456	1	GPC3;
Supernumerary maxillary incisors (mesiodens) (65% males)	1	1	6.66667	121.253	0.00824176	1	0.687456	1	NHS;
Supernumerary nipples	1	5	6.66667	24.4443	0.040579	1	1	1	GPC3;
Suture cataracts in heterozygous females	1	1	6.66667	121.253	0.00824176	1	0.687456	1	NHS;
Syndactyly, 2-3, 3-4 toe	1	3	6.66667	40.6863	0.0245354	1	1	1	FGFR3;
Syndactyly, 2-3 finger	1	3	6.66667	40.6863	0.0245354	1	1	1	FGFR3;
Syndactyly 2nd-3rd fingers	1	1	6.66667	121.253	0.00824176	1	0.687456	1	GPC3;
Syndactyly 2nd-3rd toes	1	1	6.66667	121.253	0.00824176	1	0.687456	1	GPC3;
Talipes equinovarus	1	49	6.66667	2.49879	0.337004	1	1	1	COL2A1;
Tall stature	1	6	6.66667	20.377	0.0485081	1	1	1	GPC3;
Tapered premolar and molar cusps	1	1	6.66667	121.253	0.00824176	1	0.687456	1	NHS;
Teeth	4	228	26.6667	2.13247	0.107612	1	1	1	FGFR3; GPC3; BBS1; NHS;
Telecanthus	1	17	6.66667	7.19963	0.131784	1	1	1	FGFR3;
Temporal lobe heterotopias	1	1	6.66667	121.253	0.00824176	1	0.687456	1	FGFR3;
Thenar muscle hypoplasia	1	3	6.66667	40.6863	0.0245354	1	1	1	FGFR3;
Tinnitus	1	6	6.66667	20.377	0.0485081	1	1	1	CCND1;
Tongue dystonia	1	1	6.66667	121.253	0.00824176	1	0.687456	1	THAP1;
Torrance type - Hypercellular resting cartilage, large cells, normal growth plate	1	1	6.66667	121.253	0.00824176	1	0.687456	1	COL2A1;
Torsion dystonia	1	3	6.66667	40.6863	0.0245354	1	1	1	THAP1;
Torticollis	1	15	6.66667	8.15894	0.117168	1	1	1	THAP1;
Tracheomalacia	1	6	6.66667	20.377	0.0485081	1	1	1	COL2A1;
Transitional cell bladder carcinoma	1	5	6.66667	24.4443	0.040579	1	1	1	FGFR3;
Transposition of great vessels	1	4	6.66667	30.5401	0.0325882	1	1	1	GPC3;
Trident hand	1	1	6.66667	121.253	0.00824176	1	0.687456	1	FGFR3;
Triphalangeal thumb	1	8	6.66667	15.2891	0.0641831	1	1	1	FGFR3;
Two carpal ossification centers present at birth	1	1	6.66667	121.253	0.00824176	1	0.687456	1	GPC3;
Two-step mutation hypothesis (germline mutation followed by somatic mutation or two sequential somatic mutations)	1	3	6.66667	40.6863	0.0245354	1	1	1	GPC3;
Two subtypes - seminoma and nonseminoma	1	3	6.66667	40.6863	0.0245354	1	1	1	FGFR3;
Umbilical hernias	2	3	13.3333	80.9697	0.000189392	1	0.687456	1	GPC3; COL2A1;
Upper airway obstruction	1	2	6.66667	60.9282	0.0164201	1	1	1	FGFR3;
Upturned nose	1	7	6.66667	17.4701	0.056376	1	1	1	GPC3;
User syndrome type II (congenital moderate-severe deafness, normal vestibular dysfunction, and onset of retinitis pigmentosa in late second to early third decade) - 3 loci	1	1	6.66667	121.253	0.00824176	1	0.687456	1	MYO7A;
Usher syndrome type I (congenital profound deafness, absent vestibular function, and prepubertal onset of retinitis pigmentosa) - 7 loci	1	1	6.66667	121.253	0.00824176	1	0.687456	1	MYO7A;
Usher syndrome type III (postlingual progressive deafness, variable vestibular dysfunction, and progressive retinitis pigmentosa with variable age of onset) - 1 locus	1	1	6.66667	121.253	0.00824176	1	0.687456	1	MYO7A;
Uterine agenesis (rare)	1	1	6.66667	121.253	0.00824176	1	0.687456	1	GATA3;
Uterus didelphys (rare)	1	1	6.66667	121.253	0.00824176	1	0.687456	1	GATA3;
Vaginal agenesis (rare)	1	1	6.66667	121.253	0.00824176	1	0.687456	1	GATA3;
Variable age at onset, ranging from childhood to adult	1	1	6.66667	121.253	0.00824176	1	0.687456	1	MYO7A;
Variable distribution, may be focal, segmental, multifocal, or generalized	1	1	6.66667	121.253	0.00824176	1	0.687456	1	THAP1;
Variable lumbar lordosis	1	1	6.66667	121.253	0.00824176	1	0.687456	1	FGFR3;
Variable phenotype depending on residual enzyme activity	1	1	6.66667	121.253	0.00824176	1	0.687456	1	NAGS;
Vascular	1	215	6.66667	0.569581	0.849451	1	1	1	GPC3;
Ventricular septal defect	1	52	6.66667	2.35466	0.353718	1	1	1	GPC3;
Vertebral coronal clefts (newborn)	1	2	6.66667	60.9282	0.0164201	1	1	1	COL2A1;
Vertebral segmentation defects	1	2	6.66667	60.9282	0.0164201	1	1	1	GPC3;
Vertigo	2	5	13.3333	48.6465	0.000625303	1	0.687456	1	MYO7A; CCND1;
Vertigo, mild	1	1	6.66667	121.253	0.00824176	1	0.687456	1	MYO7A;
Very short, broad tubular bones	1	1	6.66667	121.253	0.00824176	1	0.687456	1	COL2A1;
Very short distal phalanges (2nd, 3rd, 4th, 5th)	1	1	6.66667	121.253	0.00824176	1	0.687456	1	COL2A1;
Vestibular dysfunction	1	5	6.66667	24.4443	0.040579	1	1	1	MYO7A;
Vestibular dysfunction, mild	1	1	6.66667	121.253	0.00824176	1	0.687456	1	MYO7A;
VHL type 1 - renal carcinoma and hemangioblastoma	1	2	6.66667	60.9282	0.0164201	1	1	1	CCND1;
VHL type 2A - hemangioblastoma and pheochromocytoma	1	2	6.66667	60.9282	0.0164201	1	1	1	CCND1;
VHL type 2B - renal carcinoma and pheochromocytoma	1	2	6.66667	60.9282	0.0164201	1	1	1	CCND1;
VHL type 2C - pheochromocytoma only	1	2	6.66667	60.9282	0.0164201	1	1	1	CCND1;
Vision loss, profound (males)	1	1	6.66667	121.253	0.00824176	1	0.687456	1	NHS;
Visual loss	1	3	6.66667	40.6863	0.0245354	1	1	1	MYO7A;
Vitreoretinal degeneration	1	4	6.66667	30.5401	0.0325882	1	1	1	COL2A1;
Vomiting, recurrent	1	1	6.66667	121.253	0.00824176	1	0.687456	1	NAGS;
Waddling gait	1	23	6.66667	5.32228	0.174289	1	1	1	COL2A1;
Weight	1	122	6.66667	1.00373	0.64829	1	1	1	GPC3;
Wide-cupped costochondral junctions	1	1	6.66667	121.253	0.00824176	1	0.687456	1	FGFR3;
Wide flat epiphyses	1	2	6.66667	60.9282	0.0164201	1	1	1	COL2A1;
Wilms tumor	1	8	6.66667	15.2891	0.0641831	1	1	1	GPC3;
Wilms tumor are bilateral	1	3	6.66667	40.6863	0.0245354	1	1	1	GPC3;
Writer's cramp	1	5	6.66667	24.4443	0.040579	1	1	1	THAP1;
X-linked	1	25	6.66667	4.89667	0.18802	1	1	1	NHS;
X-linked dominant	1	60	6.66667	2.04075	0.396384	1	1	1	NHS;
X-linked recessive	1	99	6.66667	1.2369	0.569282	1	1	1	GPC3;
ZINC, ELEVATED PLASMA	1	1	6.66667	121.253	0.00824176	1	0.687456	1	ALB;

## Sheet: COSMIC
COSMIC of Co-expressed genes with CHRNA6
Analysis: COSMIC
Dataset name: CHRNA6 Co-expressed2
Number of genes in the dataset: 145
Number of genes in the dataset (which are available in COSMIC database) :144
Number of genes in background: 18585
Is analysis quantitative: No
						Corrected p-values
COSMIC	No. of genes in the dataset	No. of genes in the background dataset	Percentage of genes	Fold enrichment	P-value (Hypergeometric test)	Bonferroni method	BH method	Q-value (Storey-Tibshirani method)	genes mapped (from input data set)
skin	100	11549	69.4444	1.11755	0.0405877	1	0.213086	0.456308	TEX14; PAK1; AFP; SLC22A17; CYP4A22; GDPD4; FGFR3; ESRRB; CYP4X1; KAT6A; GP2; ATP2A3; ADRA1B; OR2G6; COL28A1; CCDC170; KLC2; AFF3; CNTN3; KIF12; RASSF6; RGS8; LONRF2; GPC3; INTS4; BMP2K; DENND1B; OR2T34; NOVA1; BBS1; PCDH20; SLC4A8; SF3B2; MGAT4A; RGS21; ITGB8; ANKRD13D; HMGCLL1; BARHL1; CABP4; PON1; TRIM6-TRIM34; RSF1; FCHSD2; RELT; ZDHHC11; ADARB2; UPP2; COL2A1; NUMA1; ARRB1; GLCE; DPY19L2; OR2…
prostate	89	9587	61.8056	1.19819	0.00840795	0.353134	0.127112	0.272201	TEX14; PAK1; CYP4A22; FGFR3; MYO7A; CYP4X1; KAT6A; GP2; ADRA1B; OR2G6; CCDC170; KLC2; AFF3; CNTN3; KIF12; CCND1; LONRF2; GPC3; INTS4; BMP2K; RAB1B; LETM2; NOVA1; BBS1; PCDH20; MUS81; SLC4A8; SF3B2; FIBP; ITGB8; TMEM26; HMGCLL1; TMTC2; BARHL1; CABP4; NAGS; PON1; TRIM6-TRIM34; RSF1; GDPD5; FCHSD2; RELT; TNRC18; ZDHHC11; ADARB2; COL2A1; NUMA1; ARRB1; GLCE; DPY19L2; TPPP; ANK1; PELI3; MCC; LRRN1; ARH…
biliary tract	19	1799	13.1944	1.3637	0.101866	1	0.320383	0.686078	FGFR3; KAT6A; CNTN3; TNRC18; OR2T5; ANK1; CTSF; NHS; ADAM28; ITPR2; GATA3; ALB; XRRA1; PTPRT; DLGAP1; STXBP5; ZNF281; SORCS1; WNK3;
CancerGeneCensus geneList	7	503	4.86111	1.7985	0.096583	1	0.320383	0.686078	FGFR3; KAT6A; AFF3; CCND1; GPC3; NUMA1; GATA3;
lung	121	15353	84.0278	1.01718	0.374851	1	0.747903	1	TEX14; PAK1; FOXI2; SLC22A17; CYP4A22; GDPD4; FGFR3; RAB6A; MYO7A; ESRRB; CYP4X1; KAT6A; GP2; ATP2A3; ADRA1B; OR2G6; COL28A1; CCDC170; KLC2; AFF3; CNTN3; KIF12; RASSF6; CCND1; RGS8; LONRF2; GPC3; INTS4; BMP2K; CCDC74B; RAB1B; NEU3; DENND1B; OR2T34; NOVA1; BBS1; PCDH20; MUS81; SLC4A8; FAM168A; SF3B2; RGS21; FIBP; ITGB8; TMEM26; ZNF703; ANKRD13D; TMTC2; BARHL1; NR2E3; CABP4; NAGS; TRIM6-TRIM34; RSF…
autonomic ganglia	3	736	2.08333	0.52778	0.92812	1	1	1	HMGCLL1; PON1; WNK3;
meninges	6	447	4.16667	1.73511	0.134353	1	0.352678	0.755235	SF3B2; ANK1; LRRN1; ITPR2; PTPRT; ULK2;
kidney	103	13456	71.5278	0.987946	0.633604	1	0.950405	1	TEX14; PAK1; FOXI2; AQP11; AFP; CYP4A22; GDPD4; FGFR3; RAB6A; MYO7A; CYP4X1; KAT6A; GP2; ATP2A3; COL28A1; CCDC170; KLC2; AFF3; CNTN3; KIF12; RASSF6; LONRF2; GPC3; BMP2K; CCDC74B; NEU3; DENND1B; OR2T34; NOVA1; PCDH20; MUS81; SLC4A8; FAM168A; FIBP; ITGB8; TMEM26; ZNF703; ANKRD13D; HMGCLL1; TMTC2; NR2E3; NAGS; TRIM6-TRIM34; RSF1; GDPD5; FCHSD2; RELT; TNRC18; EGLN2; ADARB2; UPP2; COL2A1; ARRB1; GLCE;…
endometrium	101	12807	70.1389	1.01786	0.413504	1	0.747903	1	TEX14; PAK1; FOXI2; AFP; SLC22A17; CYP4A22; GDPD4; FGFR3; ESRRB; CYP4X1; KAT6A; GP2; ATP2A3; ADRA1B; OR2G6; COL28A1; CCDC170; KLC2; CNTN3; KIF12; RASSF6; CCND1; RGS8; LONRF2; GPC3; INTS4; BMP2K; CCDC74B; OR2T34; NOVA1; PCDH20; MUS81; SLC4A8; FAM168A; SF3B2; MGAT4A; RGS21; FIBP; ITGB8; ANKRD13D; TMTC2; NR2E3; NAGS; PON1; GDPD5; RELT; TNRC18; EGLN2; ADARB2; UPP2; COL2A1; NUMA1; DPY19L2; RNF169; ANK…
stomach	11	1289	7.63889	1.1023	0.415231	1	0.747903	1	TEX14; PAK1; CYP4X1; KIF12; RGS8; NOVA1; SLC4A8; NR2E3; TNRC18; STXBP5; ULK2;
large intestine	140	17427	97.2222	1.03683	0.0499726	1	0.233205	0.499393	TEX14; PAK1; FOXI2; AQP11; AFP; SLC22A17; CYP4A22; GDPD4; FGFR3; RAB6A; MYO7A; ESRRB; CYP4X1; KAT6A; GP2; ATP2A3; ADRA1B; OR2G6; COL28A1; CCDC170; KLC2; AFF3; CNTN3; KIF12; RASSF6; CCND1; RGS8; LONRF2; GPC3; INTS4; BMP2K; CCDC74B; RAB1B; LETM2; NEU3; DENND1B; OR2T34; NOVA1; BBS1; PCDH20; MUS81; SLC4A8; FAM168A; SF3B2; MGAT4A; RGS21; FIBP; ITGB8; TMEM26; ZNF703; ANKRD13D; TCEAL1; HMGCLL1; TMTC2; B…
parathyroid	2	202	1.38889	1.28408	0.465453	1	0.747903	1	DRAP1; SH3BP5L;
central nervous system	97	12014	67.3611	1.04207	0.277051	1	0.684479	1	TEX14; AFP; SLC22A17; CYP4A22; GDPD4; FGFR3; MYO7A; ESRRB; CYP4X1; KAT6A; GP2; ATP2A3; ADRA1B; OR2G6; COL28A1; CCDC170; KLC2; AFF3; CNTN3; KIF12; RASSF6; LONRF2; GPC3; INTS4; BMP2K; DENND1B; OR2T34; NOVA1; BBS1; PCDH20; MUS81; SF3B2; RGS21; FIBP; ITGB8; TMEM26; HMGCLL1; TMTC2; NR2E3; CABP4; NAGS; PON1; TRIM6-TRIM34; RSF1; GDPD5; RELT; TNRC18; ZDHHC11; ADARB2; UPP2; COL2A1; NUMA1; ARRB1; DPY19L2; …
eye	4	461	2.77778	1.12255	0.480795	1	0.747903	1	FOXI2; INTS4; BMP2K; RANBP3L;
ovary	94	12007	65.2778	1.01044	0.470749	1	0.747903	1	TEX14; PAK1; AFP; SLC22A17; CYP4A22; FGFR3; MYO7A; ESRRB; CYP4X1; KAT6A; GP2; ATP2A3; OR2G6; COL28A1; AFF3; CNTN3; CCND1; RGS8; LONRF2; INTS4; BMP2K; RAB1B; NEU3; DENND1B; OR2T34; NOVA1; BBS1; PCDH20; MUS81; SLC4A8; SF3B2; RGS21; FIBP; ITGB8; ZNF703; ANKRD13D; TCEAL1; HMGCLL1; TMTC2; CABP4; PON1; TRIM6-TRIM34; RSF1; GDPD5; FCHSD2; RELT; TNRC18; ZDHHC11; EGLN2; UPP2; COL2A1; NUMA1; ARRB1; GLCE; DP…
bone	11	1330	7.63889	1.06832	0.456569	1	0.747903	1	DENND1B; PCDH20; RSF1; COL2A1; RANBP3L; ARHGEF17; KDM4B; GLDN; PTPRT; CCS; PHLDB2;
testis	1	10	0.694444	13.0214	0.0748529	1	0.314382	0.673227	FGFR3;
240 NB cases mutantgeneList	37	3941	25.6944	1.21194	0.112625	1	0.320383	0.686078	TEX14; AFP; GDPD4; ATP2A3; COL28A1; CCDC170; GPC3; LETM2; BBS1; SLC4A8; FAM168A; TMEM26; HMGCLL1; PON1; GDPD5; FCHSD2; TNRC18; ZDHHC11; RNF169; ARHGEF17; CDYL2; NHS; HAL; ADAM28; OR6B3; ARAP1; FAM169A; RNF128; B4GAT1; XRRA1; PTPRT; JADE2; GOLGA7; MOV10L1; SH3BP5L; WNK3; ADGRG2;
haematopoietic and lymphoid tissue	83	8977	57.6389	1.19335	0.0150717	0.63301	0.127112	0.272201	SLC22A17; GDPD4; FGFR3; ESRRB; CYP4X1; KAT6A; GP2; ATP2A3; ADRA1B; OR2G6; COL28A1; CCDC170; KLC2; AFF3; CNTN3; KIF12; CCND1; RGS8; LONRF2; NEU3; DENND1B; NOVA1; PCDH20; MUS81; SLC4A8; FOXD4L4; RGS21; FIBP; TMEM26; ANKRD13D; TCEAL1; HMGCLL1; TMTC2; BARHL1; NAGS; GDPD5; TNRC18; CFL1; ZDHHC11; EGLN2; ADARB2; UPP2; COL2A1; NUMA1; ARRB1; DPY19L2; ANK1; PELI3; MCC; LRRN1; RANBP3L; ARHGEF17; RAI2; SEMA3…
breast	125	14924	86.8056	1.08101	0.0269543	1	0.173916	0.372428	TEX14; PAK1; AFP; SLC22A17; CYP4A22; GDPD4; FGFR3; RAB6A; MYO7A; ESRRB; CYP4X1; KAT6A; GP2; ATP2A3; ADRA1B; OR2G6; COL28A1; CCDC170; KLC2; AFF3; CNTN3; KIF12; RASSF6; LONRF2; GPC3; INTS4; BMP2K; CCDC74B; RAB1B; NEU3; DENND1B; OR2T34; NOVA1; BBS1; PCDH20; MUS81; SLC4A8; SF3B2; MGAT4A; FIBP; ITGB8; TMEM26; ZNF703; ANKRD13D; HMGCLL1; TMTC2; BARHL1; NR2E3; NAGS; PON1; TRIM6-TRIM34; RSF1; GDPD5; FCHSD…
upper aerodigestive tract	63	6364	43.75	1.27776	0.0109314	0.45912	0.127112	0.272201	TEX14; PAK1; SLC22A17; FGFR3; KAT6A; GP2; OR2G6; COL28A1; CCDC170; AFF3; CNTN3; LONRF2; BMP2K; RAB1B; NOVA1; BBS1; PCDH20; MUS81; FOXD4L4; ANKRD13D; TMTC2; NAGS; PON1; RSF1; FCHSD2; RELT; UPP2; COL2A1; NUMA1; ARRB1; GLCE; DPY19L2; ANK1; LRRN1; RANBP3L; ARHGEF17; CDYL2; ATG16L2; KDM4B; CTSF; NHS; HAL; ADAM28; ITPR2; ARAP1; RNF128; RBM4B; DOK6; PTPRT; DLGAP1; AP5B1; TLE3; SORCS1; RAD9A; TP53TG5; UL…
cervix	22	2590	15.2778	1.0967	0.355342	1	0.747903	1	SLC22A17; FGFR3; OR2G6; COL28A1; AFF3; CNTN3; INTS4; BBS1; SF3B2; ZNF703; BARHL1; TNRC18; ATG16L2; KDM4B; ARAP1; DOK6; JADE2; CCS; SORCS1; ARMT1; WNK3; ADGRG2;
thyroid	70	8760	48.6111	1.0314	0.392117	1	0.747903	1	TEX14; PAK1; AFP; CYP4A22; FGFR3; MYO7A; ESRRB; KAT6A; GP2; ATP2A3; ADRA1B; CCDC170; KLC2; AFF3; KIF12; CCND1; LONRF2; INTS4; BMP2K; CCDC74B; OR2T34; NOVA1; BBS1; PCDH20; MUS81; SLC4A8; TMEM26; ZNF703; ANKRD13D; TRIM6-TRIM34; GDPD5; FCHSD2; RELT; TNRC18; ZDHHC11; ADARB2; UPP2; COL2A1; ARRB1; DPY19L2; OR2T5; TPPP; ANK1; MCC; ARHGEF17; RAI2; SEMA3F; KDM4B; CTSF; ST6GALNAC5; ITPR2; GATA3; OR6B3; ARA…
liver	121	14176	84.0278	1.10163	0.0151324	0.635559	0.127112	0.272201	TEX14; PAK1; FOXI2; AFP; SLC22A17; CYP4A22; GDPD4; FGFR3; MYO7A; ESRRB; KAT6A; GP2; ATP2A3; ADRA1B; OR2G6; COL28A1; CCDC170; KLC2; AFF3; CNTN3; CCND1; LONRF2; GPC3; INTS4; BMP2K; CCDC74B; RAB1B; NEU3; DENND1B; OR2T34; NOVA1; PCDH20; SLC4A8; SF3B2; MGAT4A; RGS21; FIBP; ITGB8; TMEM26; ZNF703; HMGCLL1; TMTC2; BARHL1; NR2E3; CABP4; NAGS; PON1; TRIM6-TRIM34; RSF1; GDPD5; FCHSD2; RELT; TNRC18; CFL1; ZD…
pancreas	110	12286	76.3889	1.15556	0.00477491	0.200546	0.127112	0.272201	TEX14; PAK1; SLC22A17; CYP4A22; GDPD4; FGFR3; RAB6A; MYO7A; ESRRB; CYP4X1; KAT6A; GP2; ATP2A3; ADRA1B; OR2G6; COL28A1; CCDC170; KLC2; AFF3; CNTN3; KIF12; RASSF6; LONRF2; INTS4; BMP2K; CCDC74B; NEU3; DENND1B; OR2T34; NOVA1; BBS1; PCDH20; SLC4A8; FAM168A; SF3B2; FIBP; TMEM26; ZNF703; HMGCLL1; TMTC2; BARHL1; CABP4; PON1; TRIM6-TRIM34; RSF1; GDPD5; FCHSD2; TNRC18; ZDHHC11; ADARB2; UPP2; COL2A1; NUMA1…
neuroblastoma	3	744	2.08333	0.522105	0.931344	1	1	1	HMGCLL1; PON1; WNK3;
oesophagus	51	5660	35.4167	1.16308	0.114422	1	0.320383	0.686078	TEX14; CYP4A22; GDPD4; MYO7A; ESRRB; ATP2A3; ADRA1B; COL28A1; AFF3; CNTN3; RASSF6; INTS4; NEU3; NOVA1; BBS1; PCDH20; SLC4A8; FAM168A; SF3B2; MGAT4A; TMEM26; ZNF703; ANKRD13D; TMTC2; CABP4; GDPD5; TNRC18; ZDHHC11; COL2A1; NUMA1; RNF169; RANBP3L; ARHGEF17; RAI2; SEMA3F; KDM4B; NHS; HAL; ADAM28; ITPR2; RNF128; PTPRT; DLGAP1; ZNF281; SORCS1; FAM110B; ULK2; ARMT1; MOV10L1; WNK3; ADGRG2;
urinary tract	109	13085	75.6944	1.07513	0.0944507	1	0.320383	0.686078	TEX14; PAK1; AQP11; AFP; SLC22A17; CYP4A22; GDPD4; FGFR3; RAB6A; MYO7A; ESRRB; KAT6A; GP2; ATP2A3; ADRA1B; OR2G6; COL28A1; CCDC170; KLC2; AFF3; CNTN3; KIF12; RASSF6; CCND1; RGS8; LONRF2; INTS4; BMP2K; CCDC74B; DENND1B; OR2T34; NOVA1; BBS1; PCDH20; MUS81; SLC4A8; SF3B2; MGAT4A; FOXD4L4; FIBP; ITGB8; TMEM26; ANKRD13D; TCEAL1; HMGCLL1; TMTC2; CABP4; PON1; TRIM6-TRIM34; RSF1; GDPD5; FCHSD2; RELT; TNR…
small intestine	2	196	1.38889	1.32339	0.44997	1	0.747903	1	MCC; NHS;
salivary gland	9	555	6.25	2.09505	0.0289859	1	0.173916	0.372428	INTS4; BBS1; MGAT4A; ITGB8; TNRC18; SORCS1; CCDC74A; MOV10L1; ADGRG2;
